# Supplementary material
Source: PubMed Central journal article supplement (PMC6677583)
Supplement: NIHMS1035714-supplement-Supplemental_Information.pdf [file NIHMS1035714-supplement-Supplemental_Information.pdf]

Supporting Information:

# Metabolomic Analysis of Liver Tissues for Characterization of Hepatocellular Carcinoma

Alessia Ferrarini,<sup>†,||</sup> Cristina Di Poto,<sup>†,||</sup> Shisi He,<sup>†</sup> Chao Tu,<sup>†</sup> Rency S. Varghese,<sup>†</sup> Abdalla Kara Balla,<sup>§</sup> Meth Jayatilake,<sup>†</sup> Zhenzhi Li,<sup>†</sup> Kian Ghaffari,<sup>†</sup> Ziling Fan,<sup>†</sup> Zaki A. Sherif,<sup>‡</sup> Deepak Kumar,<sup>¶</sup> Alexander Kroemer,<sup>§</sup> Mahlet G. Tadesse,<sup>‡</sup> and Habtom W. Ressonm <sup>\*,†</sup>

<sup>†</sup>Department of Oncology and <sup>‡</sup>Department of Mathematics and Statistics, Georgetown University, Washington, D.C. 20057, United States

<sup>§</sup>MedStar Georgetown Transplant Institute, Washington, D.C. 20007, United States

<sup>‡</sup>Department of Biochemistry & Molecular Biology, Howard University, Washington D.C. 20059, United States

<sup>¶</sup>Julius L. Chambers Biomedical/Biotechnology Research Institute, North Carolina Central University, Durham, North Carolina 11 27707, United States

<sup>||</sup>These authors contributed equally.

\*Corresponding Author: E-mail: hwr@georgetown.edu. Phone: 202-687-2283. Fax: 202-687-0227

## List of Supporting Information

**S1 Fig.** Experimental design for GC-MS analysis.

**S2 Fig.** Experimental design for LC-MS analysis.

**S3 Fig.** Summary of software tools used for GC-MS and LC-MS data pre-processing.

**S4 Fig.** Dot plots of selected metabolites detected by GC-MS.

**S5 Fig.** Dot plots of selected metabolites detected by LC-POS-MS.

**S6 Fig.** Dot plots of selected metabolites detected by LC-NEG-MS.

**S1 Table** Statistically significant analytes (FDR <10%) with assigned putative identification for the HCC-C v ADJ-C comparison.

**S2 Table** Statistically significant analytes (FDR <10%) with assigned putative identification for the HCC-N v ADJ-N comparison.

**S3 Table** EI or ESI fragments used to confirm the metabolites identification of analytes detected by GC-MS and LC-MS.

S1 Fig.

| BATCH 1  |                  |
|----------|------------------|
| Sequence | Sample name      |
| 1        | wash             |
| 2        | C18_A_01         |
| 3        | C18_A_02         |
| 4        | wash             |
| 5        | blank            |
| 6        | wash             |
| 7        | RI (Alcane+FAME) |
| 8        | QC_all_01        |
| 9        | QC_all_02        |
| 10       | QC_all_03        |
| 11       | QC_all_04        |
| 12       | QC_all_05        |
| 13       | QC_ADJ/C_01      |
| 14       | QC_HCC/C_01      |
| 15       | QC_ADJ/N_01      |
| 16       | QC_HCC/N_01      |
| 17       | ADJ-Cirrhosis    |
| 18       | HCC-Cirrhosis    |
| 19       | ADJ-Normal       |
| 20       | HCC-Normal       |
| 21       | ADJ-Cirrhosis    |
| 22       | HCC-Cirrhosis    |
| 23       | ADJ-Normal       |
| 24       | QC_ADJ/C_02      |
| 25       | QC_HCC/C_02      |
| 26       | QC_ADJ/N_02      |
| 27       | QC_HCC/N_02      |
| 28       | HCC-Normal       |
| 29       | ADJ-Cirrhosis    |
| 30       | HCC-Cirrhosis    |
| 31       | ADJ-Cirrhosis    |
| 32       | HCC-Cirrhosis    |
| 33       | ADJ-Normal       |
| 34       | HCC-Normal       |
| 35       | ADJ-Cirrhosis    |
| 36       | HCC-Cirrhosis    |
| 37       | QC_ADJ/C_03      |
| 38       | QC_HCC/C_03      |
| 39       | QC_ADJ/N_03      |
| 40       | QC_HCC/N_03      |
| 41       | wash             |
| 42       | RI (Alcane+FAME) |

| BATCH 2  |                  |
|----------|------------------|
| Sequence | Sample name      |
| 1        | wash             |
| 2        | C18_B_01         |
| 3        | C18_B_02         |
| 4        | wash             |
| 5        | blank            |
| 6        | wash             |
| 7        | RI (Alcane+FAME) |
| 8        | QC_all_01        |
| 9        | QC_all_02        |
| 10       | QC_all_03        |
| 11       | QC_all_04        |
| 12       | QC_all_05        |
| 13       | QC_ADJ/C_04      |
| 14       | QC_HCC/C_04      |
| 15       | QC_ADJ/N_04      |
| 16       | QC_HCC/N_04      |
| 17       | ADJ-Cirrhosis    |
| 18       | HCC-Cirrhosis    |
| 19       | ADJ-Normal       |
| 20       | HCC-Normal       |
| 21       | ADJ-Cirrhosis    |
| 22       | HCC-Cirrhosis    |
| 23       | ADJ-Normal       |
| 24       | QC_HCC/C_05      |
| 25       | QC_ADJ/C_05      |
| 26       | QC_HCC/N_05      |
| 27       | QC_ADJ/N_05      |
| 28       | HCC-Normal       |
| 29       | ADJ-Cirrhosis    |
| 30       | HCC-Cirrhosis    |
| 31       | ADJ-Cirrhosis    |
| 32       | HCC-Cirrhosis    |
| 33       | ADJ-Normal       |
| 34       | HCC-Normal       |
| 35       | ADJ-Cirrhosis    |
| 36       | HCC-Cirrhosis    |
| 37       | QC_ADJ/C_06      |
| 38       | QC_HCC/C_06      |
| 39       | QC_ADJ/N_06      |
| 40       | QC_HCC/N_06      |
| 41       | wash             |
| 42       | RI (Alcane+FAME) |

| BATCH 3  |                  |
|----------|------------------|
| Sequence | Sample name      |
| 1        | wash             |
| 2        | C18_C_01         |
| 3        | C18_C_02         |
| 4        | wash             |
| 5        | blank            |
| 6        | wash             |
| 7        | RI (Alcane+FAME) |
| 8        | QC_all_01        |
| 9        | QC_all_02        |
| 10       | QC_all_03        |
| 11       | QC_all_04        |
| 12       | QC_all_05        |
| 13       | QC_ADJ/N_07      |
| 14       | QC_HCC/N_07      |
| 15       | ADJ-Normal       |
| 16       | HCC-Normal       |
| 17       | ADJ-Normal       |
| 18       | HCC-Normal       |
| 19       | ADJ-Normal       |
| 20       | HCC-Normal       |
| 21       | ADJ-Normal       |
| 22       | QC_ADJ/N_08      |
| 23       | QC_HCC/N_08      |
| 24       | HCC-Normal       |
| 25       | ADJ-Normal       |
| 26       | HCC-Normal       |
| 27       | ADJ-Normal       |
| 28       | HCC-Normal       |
| 29       | ADJ-Normal       |
| 30       | HCC-Normal       |
| 31       | ADJ-Normal       |
| 32       | HCC-Normal       |
| 33       | QC_ADJ/N_09      |
| 34       | QC_HCC/N_09      |
| 35       | wash             |
| 36       | RI (Alcane+FAME) |

| BATCH 4  |                  |
|----------|------------------|
| Sequence | Sample name      |
| 1        | wash             |
| 2        | C18_D_01         |
| 3        | C18_D_02         |
| 4        | wash             |
| 5        | blank            |
| 6        | wash             |
| 7        | RI (Alcane+FAME) |
| 8        | QC_all_01        |
| 9        | QC_all_02        |
| 10       | QC_all_03        |
| 11       | QC_all_04        |
| 12       | QC_all_05        |
| 13       | QC_ADJ/N_10      |
| 14       | QC_HCC/N_10      |
| 15       | ADJ-Normal       |
| 16       | HCC-Normal       |
| 17       | ADJ-Normal       |
| 18       | HCC-Normal       |
| 19       | ADJ-Normal       |
| 20       | HCC-Normal       |
| 21       | ADJ-Normal       |
| 22       | HCC-Normal       |
| 23       | QC_ADJ/N_11      |
| 24       | QC_HCC/N_11      |
| 25       | ADJ-Normal       |
| 26       | HCC-Normal       |
| 27       | ADJ-Normal       |
| 28       | HCC-Normal       |
| 29       | ADJ-Normal       |
| 30       | HCC-Normal       |
| 31       | ADJ-Normal       |
| 32       | HCC-Normal       |
| 33       | QC_ADJ/N_12      |
| 34       | QC_HCC/N_12      |
| 35       | wash             |
| 36       | RI (Alcane+FAME) |

| BATCH 5  |                  |
|----------|------------------|
| Sequence | Sample name      |
| 1        | wash             |
| 2        | C18_E_01         |
| 3        | C18_E_02         |
| 4        | wash             |
| 5        | blank            |
| 6        | wash             |
| 7        | RI (Alcane+FAME) |
| 8        | QC_all_01        |
| 9        | QC_all_02        |
| 10       | QC_all_03        |
| 11       | QC_all_04        |
| 12       | QC_all_05        |
| 13       | QC_ADJ/N_13      |
| 14       | QC_HCC/N_13      |
| 15       | ADJ-Normal       |
| 16       | HCC-Normal       |
| 17       | ADJ-Normal       |
| 18       | HCC-Normal       |
| 19       | ADJ-Normal       |
| 20       | HCC-Normal       |
| 21       | ADJ-Normal       |
| 22       | QC_ADJ/N_14      |
| 23       | QC_HCC/N_14      |
| 24       | HCC-Normal       |
| 25       | ADJ-Normal       |
| 26       | HCC-Normal       |
| 27       | ADJ-Normal       |
| 28       | HCC-Normal       |
| 29       | ADJ-Normal       |
| 30       | HCC-Normal       |
| 31       | ADJ-Normal       |
| 32       | HCC-Normal       |
| 33       | QC_ADJ/N_15      |
| 34       | QC_HCC/N_15      |
| 35       | wash             |
| 36       | RI (Alcane+FAME) |

S2 Fig.

| Positive |               | Negative |               |
|----------|---------------|----------|---------------|
| Sequence | Sample Name   | Sequence | Sample Name   |
| 1        | ACN           | 1        | ACN           |
| 2        | Metmix        | 2        | Metmix        |
| 3        | water         | 3        | water         |
| 4        | Blank_A       | 4        | Blank_A       |
| 5        | Blank_B       | 5        | Blank_B       |
| 6        | Blank_C       | 6        | Blank_C       |
| 7        | Blank_D       | 7        | Blank_D       |
| 8        | Blank_E       | 8        | Blank_E       |
| 9        | QC_all_01     | 9        | QC_all_01     |
| 10       | QC_all_02     | 10       | QC_all_02     |
| 11       | QC_all_03     | 11       | QC_all_03     |
| 12       | QC_all_04     | 12       | QC_all_04     |
| 13       | QC_all_05     | 13       | QC_all_05     |
| 14       | QC_all_06     | 14       | QC_all_06     |
| 15       | QC_all_07     | 15       | QC_all_07     |
| 16       | QC_ADJ/C_01   | 16       | QC_ADJ/C_01   |
| 17       | QC_HCC/C_01   | 17       | QC_HCC/C_01   |
| 18       | QC_ADJ/N_01   | 18       | QC_ADJ/N_01   |
| 19       | QC_HCC/N_01   | 19       | QC_HCC/N_01   |
| 20       | ADJ-Cirrhosis | 20       | ADJ-Cirrhosis |
| 21       | HCC-Cirrhosis | 21       | HCC-Cirrhosis |
| 22       | ADJ-Normal    | 22       | ADJ-Normal    |
| 23       | HCC-Normal    | 23       | HCC-Normal    |
| 24       | ADJ-Cirrhosis | 24       | ADJ-Cirrhosis |
| 25       | HCC-Cirrhosis | 25       | HCC-Cirrhosis |
| 26       | ADJ-Normal    | 26       | ADJ-Normal    |
| 27       | HCC-Normal    | 27       | HCC-Normal    |
| 28       | ADJ-Cirrhosis | 28       | ADJ-Cirrhosis |
| 29       | HCC-Cirrhosis | 29       | HCC-Cirrhosis |
| 30       | ADJ-Cirrhosis | 30       | ADJ-Cirrhosis |
| 31       | HCC-Cirrhosis | 31       | HCC-Cirrhosis |
| 32       | ADJ-Normal    | 32       | ADJ-Normal    |
| 33       | HCC-Normal    | 33       | HCC-Normal    |
| 34       | ADJ-Cirrhosis | 34       | ADJ-Cirrhosis |
| 35       | HCC-Cirrhosis | 35       | HCC-Cirrhosis |
| 36       | QC_ADJ/C_02   | 36       | QC_ADJ/C_02   |
| 37       | QC_HCC/C_02   | 37       | QC_HCC/C_02   |
| 38       | QC_ADJ/N_02   | 38       | QC_ADJ/N_02   |
| 39       | QC_HCC/N_02   | 39       | QC_HCC/N_02   |
| 40       | ADJ-Cirrhosis | 40       | ADJ-Cirrhosis |
| 41       | HCC-Cirrhosis | 41       | HCC-Cirrhosis |
| 42       | ADJ-Normal    | 42       | ADJ-Normal    |
| 43       | HCC-Normal    | 43       | HCC-Normal    |
| 44       | ADJ-Cirrhosis | 44       | ADJ-Cirrhosis |
| 45       | HCC-Cirrhosis | 45       | HCC-Cirrhosis |
| 46       | ADJ-Normal    | 46       | ADJ-Normal    |
| 47       | HCC-Normal    | 47       | HCC-Normal    |
| 48       | ADJ-Cirrhosis | 48       | ADJ-Cirrhosis |
| 49       | HCC-Cirrhosis | 49       | HCC-Cirrhosis |
| 50       | ADJ-Cirrhosis | 50       | ADJ-Cirrhosis |
| 51       | HCC-Cirrhosis | 51       | HCC-Cirrhosis |
| 52       | ADJ-Normal    | 52       | ADJ-Normal    |
| 53       | HCC-Normal    | 53       | HCC-Normal    |
| 54       | ADJ-Cirrhosis | 54       | ADJ-Cirrhosis |
| 55       | HCC-Cirrhosis | 55       | HCC-Cirrhosis |
| 56       | QC_ADJ/C_03   | 56       | QC_ADJ/C_03   |
| 57       | QC_HCC/C_03   | 57       | QC_HCC/C_03   |
| 58       | QC_ADJ/N_03   | 58       | QC_ADJ/N_03   |
| 59       | QC_HCC/N_03   | 59       | QC_HCC/N_03   |
| 60       | ADJ-Normal    | 60       | ADJ-Normal    |
| 61       | HCC-Normal    | 61       | HCC-Normal    |

# S2 Fig. (continue)

| Positive (continue) |             | Negative (continue) |             |
|---------------------|-------------|---------------------|-------------|
| Sequence            | Sample Name | Sequence            | Sample Name |
| 62                  | ADJ-Normal  | 62                  | ADJ-Normal  |
| 63                  | HCC-Normal  | 63                  | HCC-Normal  |
| 64                  | ADJ-Normal  | 64                  | ADJ-Normal  |
| 65                  | HCC-Normal  | 65                  | HCC-Normal  |
| 66                  | ADJ-Normal  | 66                  | ADJ-Normal  |
| 67                  | HCC-Normal  | 67                  | HCC-Normal  |
| 68                  | ADJ-Normal  | 68                  | ADJ-Normal  |
| 69                  | HCC-Normal  | 69                  | HCC-Normal  |
| 70                  | ADJ-Normal  | 70                  | ADJ-Normal  |
| 71                  | HCC-Normal  | 71                  | HCC-Normal  |
| 72                  | ADJ-Normal  | 72                  | ADJ-Normal  |
| 73                  | HCC-Normal  | 73                  | HCC-Normal  |
| 74                  | ADJ-Normal  | 74                  | ADJ-Normal  |
| 75                  | HCC-Normal  | 75                  | HCC-Normal  |
| 76                  | QC_ADJ/C_04 | 76                  | QC_ADJ/C_04 |
| 77                  | QC_HCC/C_04 | 77                  | QC_HCC/C_04 |
| 78                  | QC_ADJ/N_04 | 78                  | QC_ADJ/N_04 |
| 79                  | QC_HCC/N_04 | 79                  | QC_HCC/N_04 |
| 80                  | ADJ-Normal  | 80                  | ADJ-Normal  |
| 81                  | HCC-Normal  | 81                  | HCC-Normal  |
| 82                  | ADJ-Normal  | 82                  | ADJ-Normal  |
| 83                  | HCC-Normal  | 83                  | HCC-Normal  |
| 84                  | ADJ-Normal  | 84                  | ADJ-Normal  |
| 85                  | HCC-Normal  | 85                  | HCC-Normal  |
| 86                  | ADJ-Normal  | 86                  | ADJ-Normal  |
| 87                  | HCC-Normal  | 87                  | HCC-Normal  |
| 88                  | ADJ-Normal  | 88                  | ADJ-Normal  |
| 89                  | HCC-Normal  | 89                  | HCC-Normal  |
| 90                  | ADJ-Normal  | 90                  | ADJ-Normal  |
| 91                  | HCC-Normal  | 91                  | HCC-Normal  |
| 92                  | ADJ-Normal  | 92                  | ADJ-Normal  |
| 93                  | HCC-Normal  | 93                  | HCC-Normal  |
| 94                  | ADJ-Normal  | 94                  | ADJ-Normal  |
| 95                  | HCC-Normal  | 95                  | HCC-Normal  |
| 96                  | QC_ADJ/C_05 | 96                  | QC_ADJ/C_05 |
| 97                  | QC_HCC/C_05 | 97                  | QC_HCC/C_05 |
| 98                  | QC_ADJ/N_05 | 98                  | QC_ADJ/N_05 |
| 99                  | QC_HCC/N_05 | 99                  | QC_HCC/N_05 |
| 100                 | ADJ-Normal  | 100                 | ADJ-Normal  |
| 101                 | HCC-Normal  | 101                 | HCC-Normal  |
| 102                 | ADJ-Normal  | 102                 | ADJ-Normal  |
| 103                 | HCC-Normal  | 103                 | HCC-Normal  |
| 104                 | ADJ-Normal  | 104                 | ADJ-Normal  |
| 105                 | HCC-Normal  | 105                 | HCC-Normal  |
| 106                 | ADJ-Normal  | 106                 | ADJ-Normal  |
| 107                 | HCC-Normal  | 107                 | HCC-Normal  |
| 108                 | ADJ-Normal  | 108                 | ADJ-Normal  |
| 109                 | HCC-Normal  | 109                 | HCC-Normal  |
| 110                 | ADJ-Normal  | 110                 | ADJ-Normal  |
| 111                 | HCC-Normal  | 111                 | HCC-Normal  |
| 112                 | ADJ-Normal  | 112                 | ADJ-Normal  |
| 113                 | HCC-Normal  | 113                 | HCC-Normal  |
| 114                 | ADJ-Normal  | 114                 | ADJ-Normal  |
| 115                 | HCC-Normal  | 115                 | HCC-Normal  |
| 116                 | QC_ADJ/C_06 | 116                 | QC_ADJ/C_06 |
| 117                 | QC_HCC/C_06 | 117                 | QC_HCC/C_06 |
| 118                 | QC_ADJ/N_06 | 118                 | QC_ADJ/N_06 |
| 119                 | QC_HCC/N_06 | 119                 | QC_HCC/N_06 |
| 120                 | ACN         | 120                 | ACN         |
| 121                 | Metmix      | 121                 | Metmix      |
| 122                 | water       | 122                 | water       |

S3 Fig.

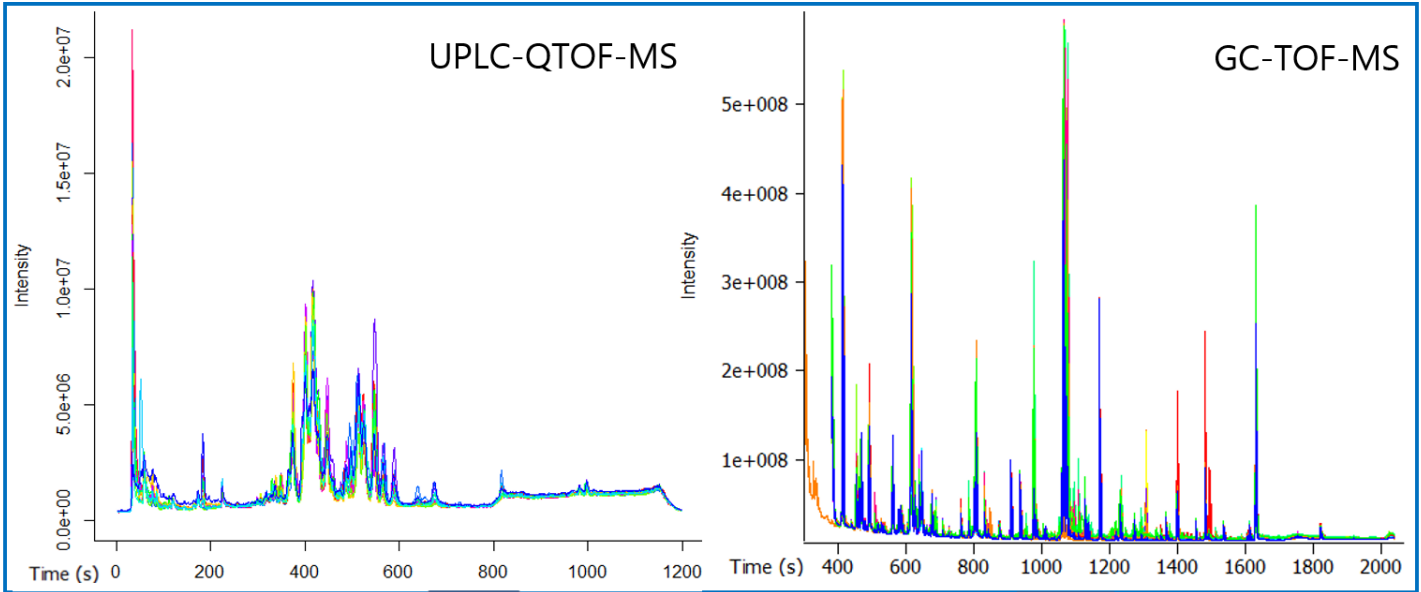

**GC-TOF-MS**

- LECO ChromaTOF:
  - Peak finding
  - True signal deconvolution
  - Library for metabolite identification: Fiehn 2013 & NIST 2011
  - Alignment with Statistical Compare

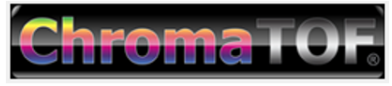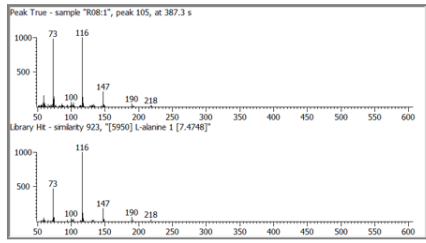

**UPLC-QTOF-MS**

- IPO
  - Optimizing XCMS parameter for peak detection, RT correction and alignment
- XCMS (version 1.44)
  - Filtration and peak finding
  - RT correction & alignment
  - Filling missing peaks
- Annotation with CAMERA
  - Grouping all adducts, cluster ions and charge states entities derived from same analyte

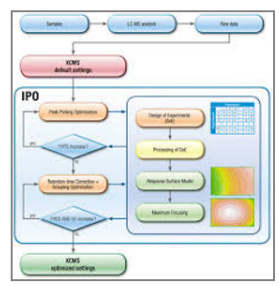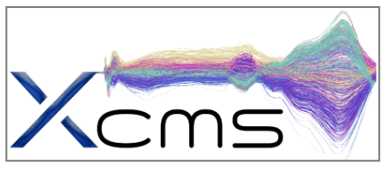

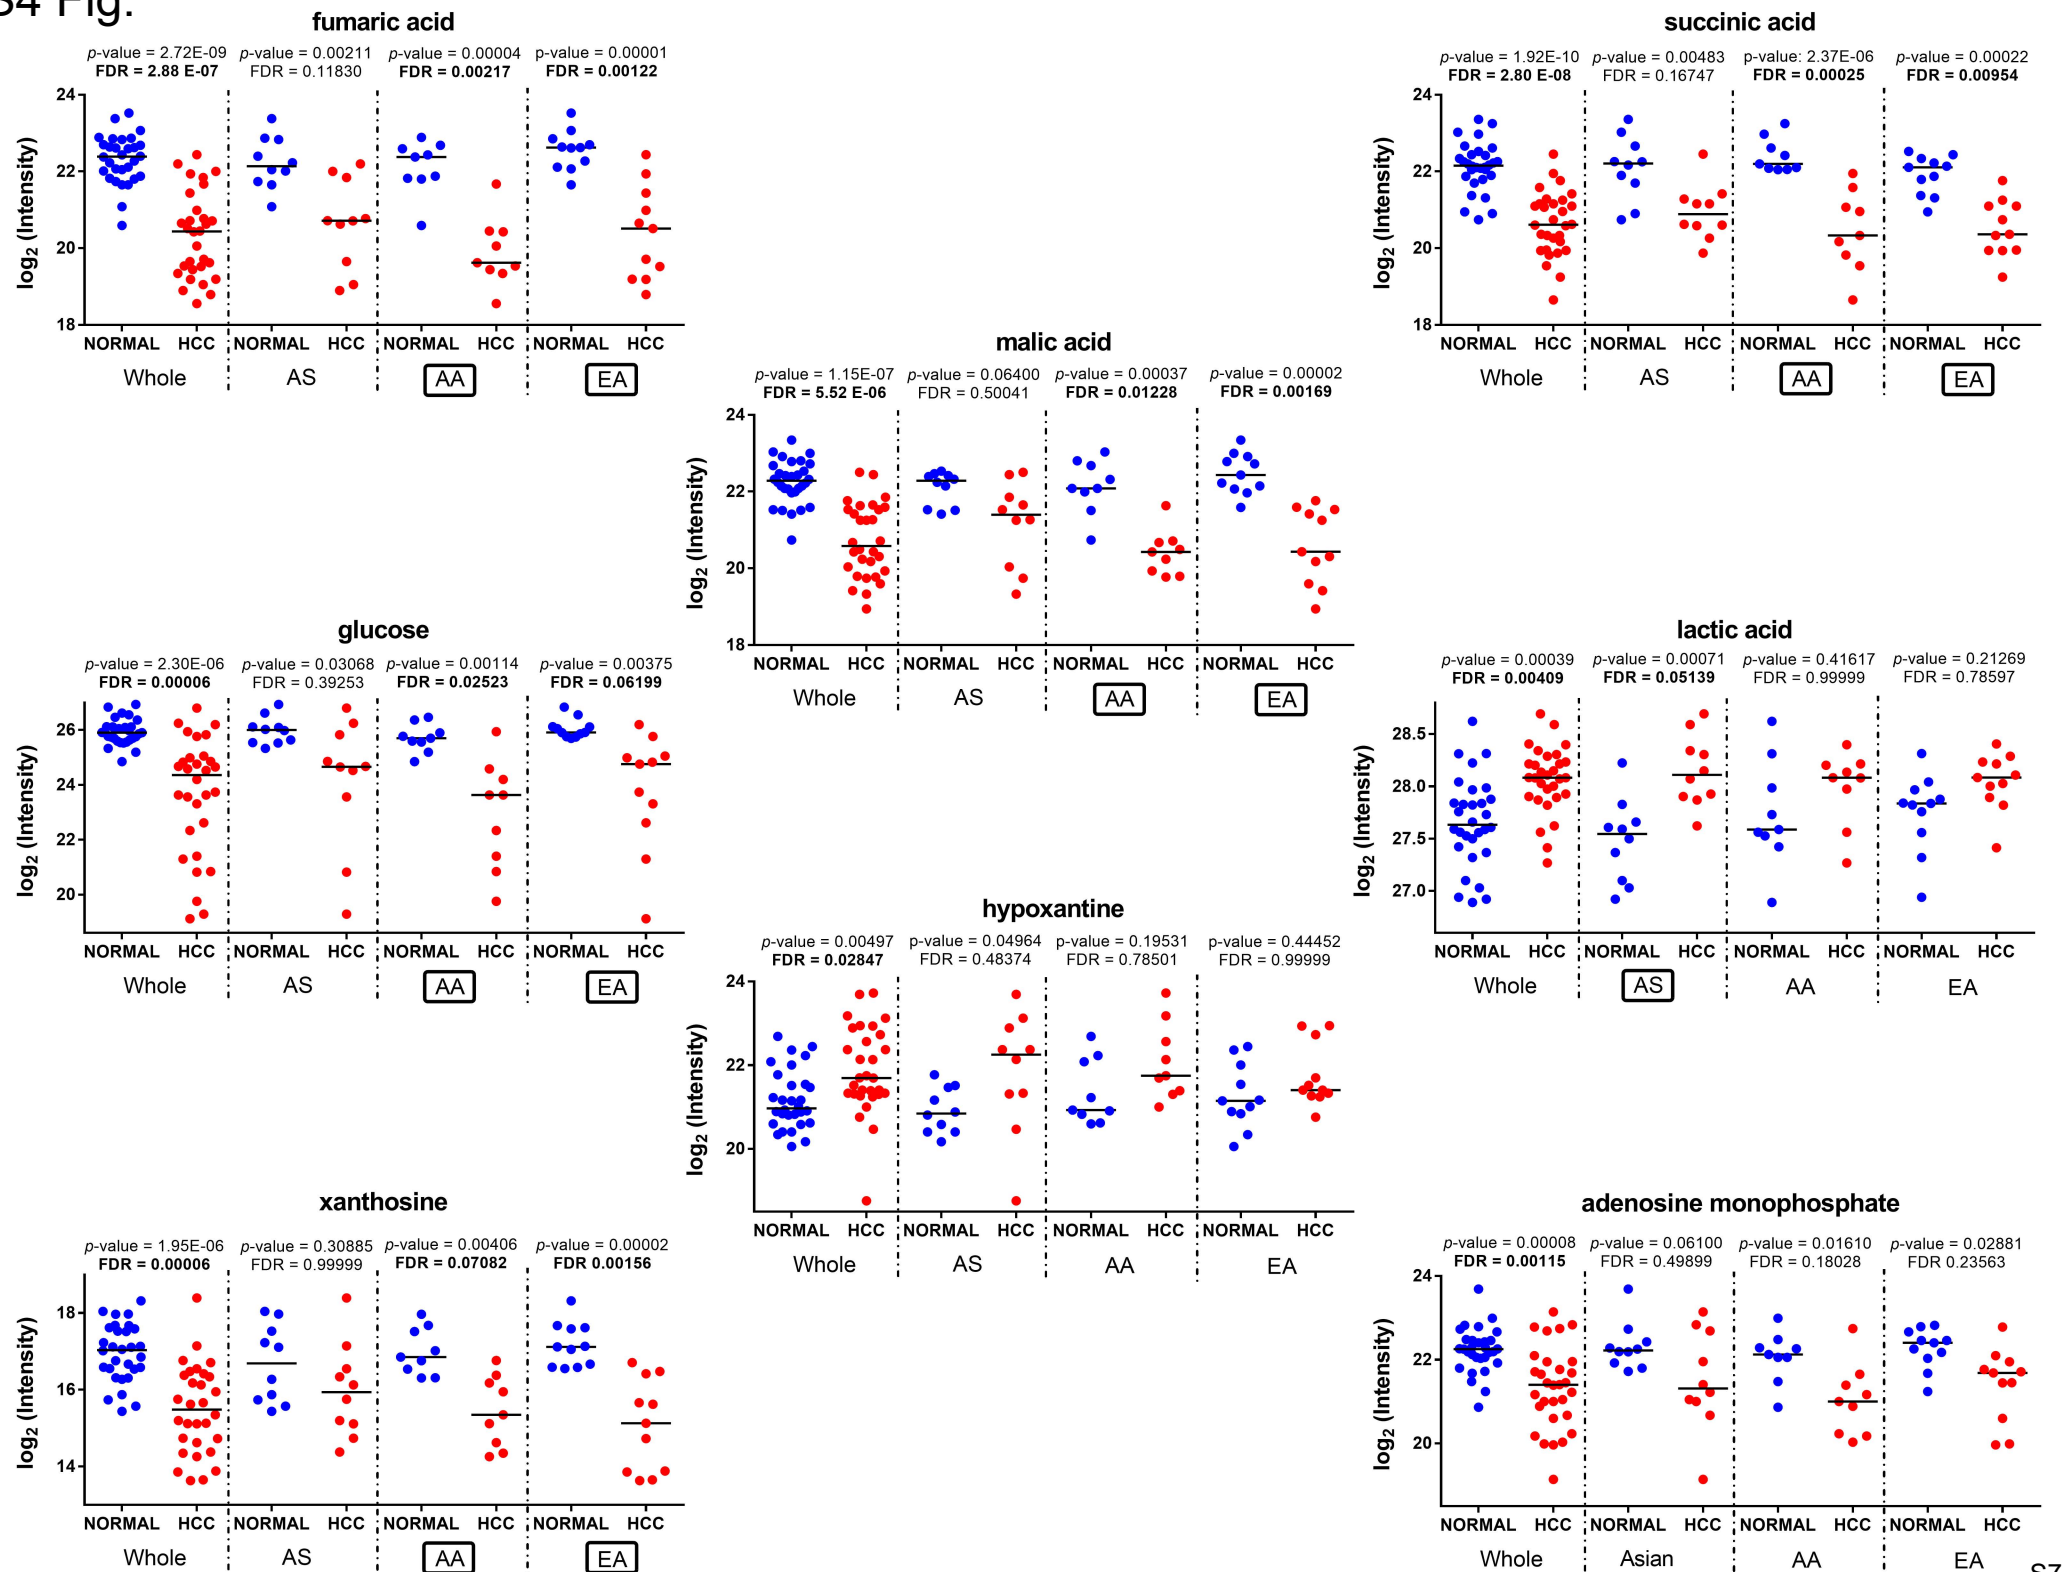

S5 Fig.

## propionylcarnitine

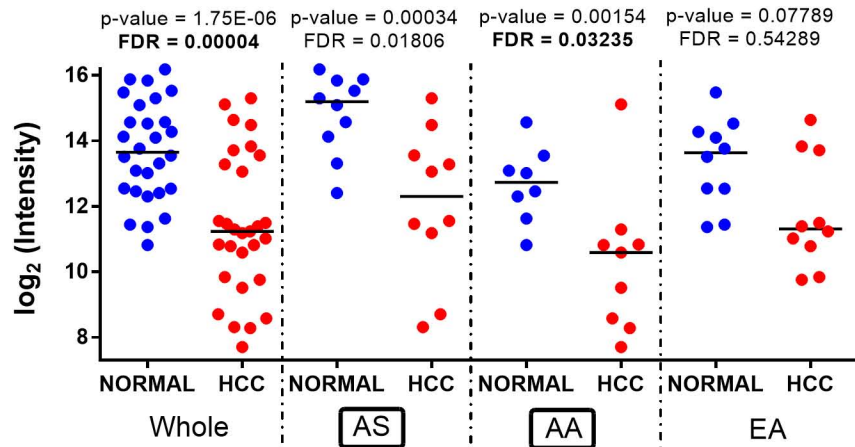

## PC(34:2)

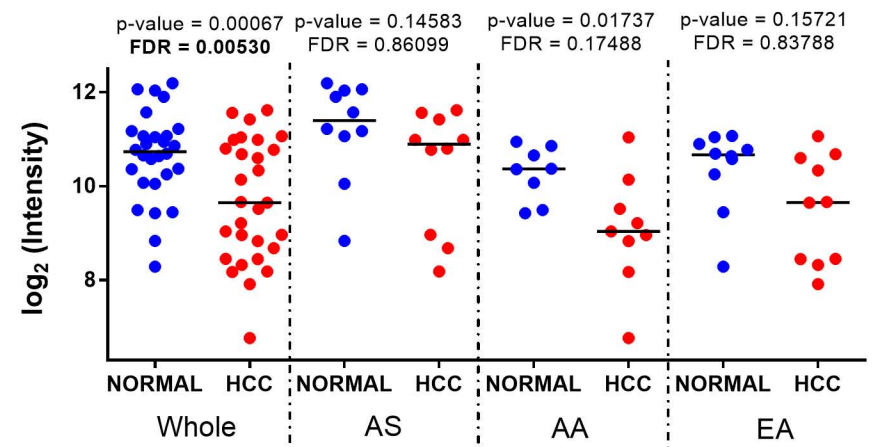

## PC(36:1)

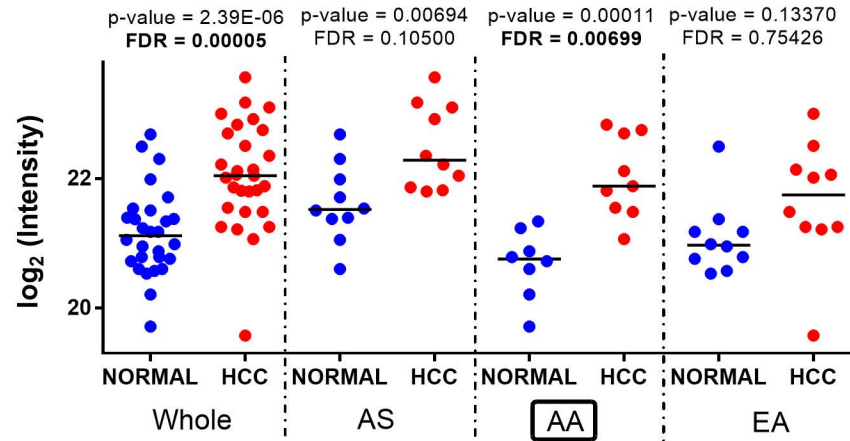

## PC(38:2)

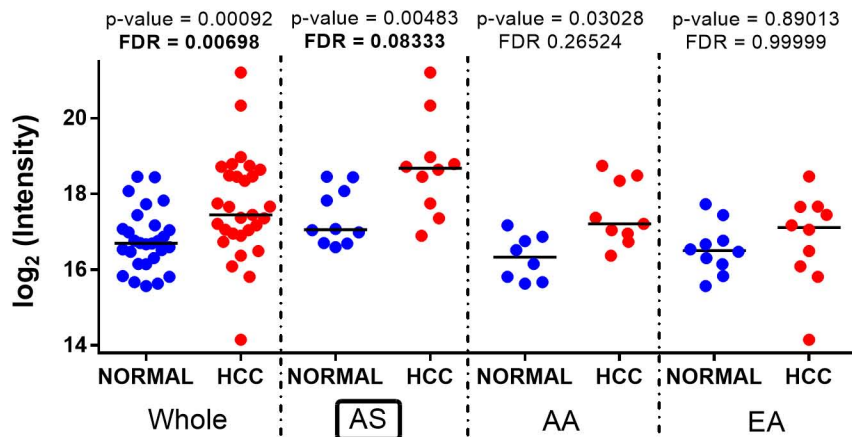

## glycerophosphocholine

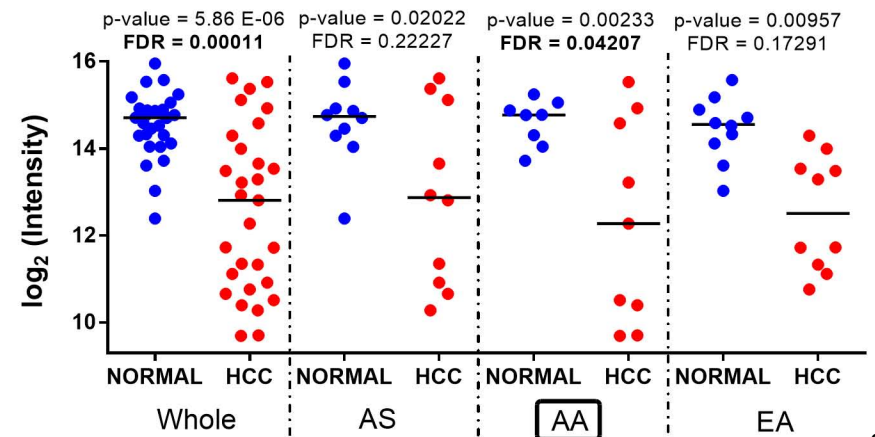



**hypoxanthine**

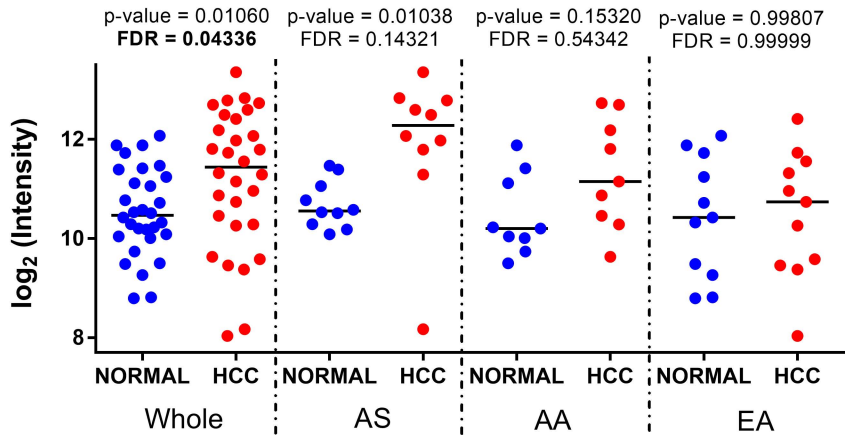

**xanthosine**

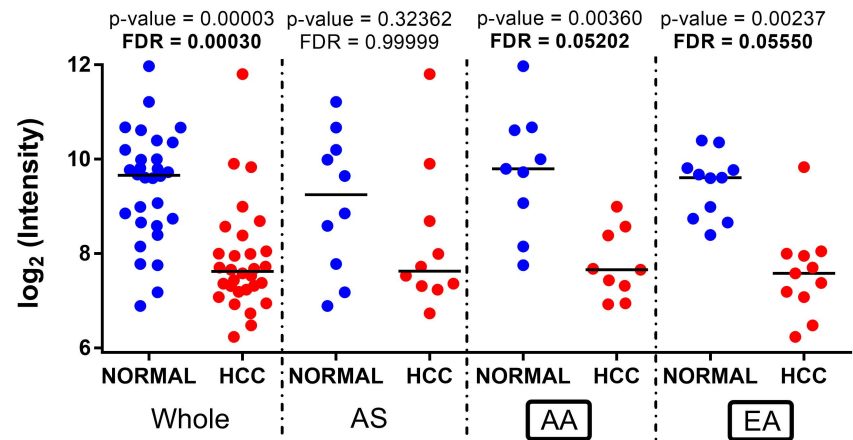

**adenosine monophosphate**

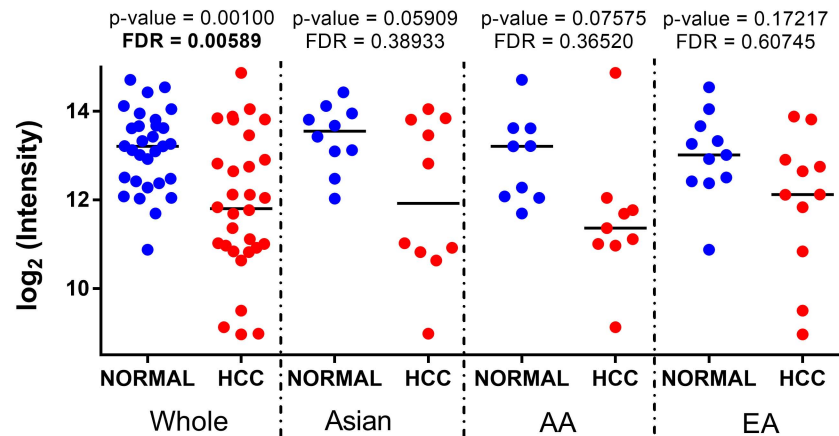

**glycerol 3-phosphate**

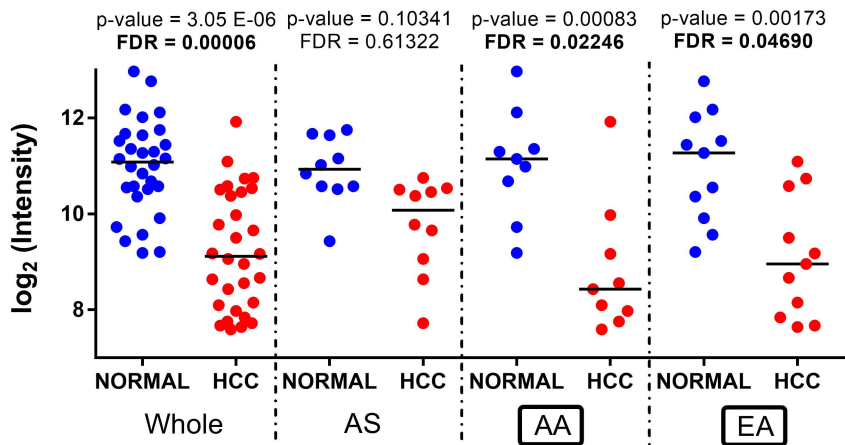

**glycerylphosphorylethanolamine**

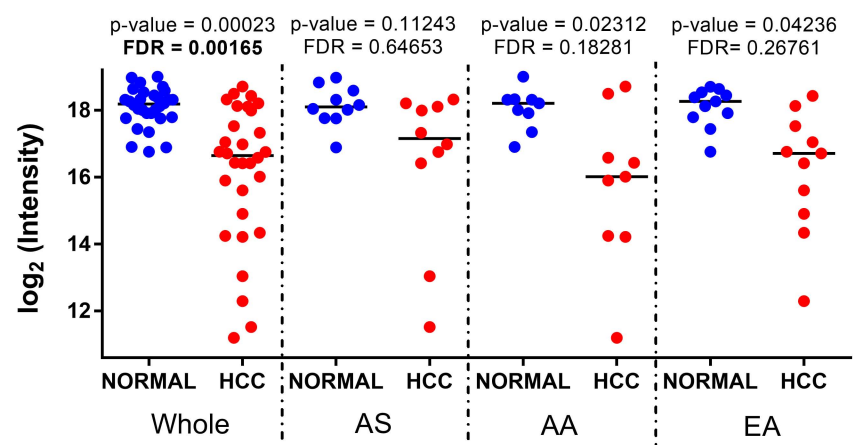

|                    |
|--------------------|
| p-value            |
| adj. p-value (FDR) |
| Fold change > +1.5 |
| Fold change < -1.5 |

| PLATFORM  | extract mass | rt (')                                                                                                                                                                                   | IDENTIFICATION                                                                                                                                                                                                                                                                                                          | HCC v adj. C |         |         |         |         |         |         |         |         |
|-----------|--------------|------------------------------------------------------------------------------------------------------------------------------------------------------------------------------------------|-------------------------------------------------------------------------------------------------------------------------------------------------------------------------------------------------------------------------------------------------------------------------------------------------------------------------|--------------|---------|---------|---------|---------|---------|---------|---------|---------|
|           |              |                                                                                                                                                                                          |                                                                                                                                                                                                                                                                                                                         | WP           |         |         | AA      |         |         | EA      |         |         |
|           |              |                                                                                                                                                                                          |                                                                                                                                                                                                                                                                                                                         | p-value      | FDR     | FC*     | p-value | FDR     | FC*     | p-value | FDR     | FC*     |
| GC-MS     | 315          | 16.2                                                                                                                                                                                     | [668] dihydroxyacetone phosphate 1 [15.804]                                                                                                                                                                                                                                                                             | 0.00002      | 0.01736 | -4.87   | 0.00007 | 0.04937 | -9.14   | 0.04384 | 1.00000 | -3.04   |
|           | 315          | 16.3                                                                                                                                                                                     | [668] dihydroxyacetone phosphate 2 [15.929]                                                                                                                                                                                                                                                                             | 0.00060      | 0.08737 | -5.03   | 0.00303 | 0.20690 | -8.73   | 0.08079 | 1.00000 | -3.24   |
|           | 357          | 20.0                                                                                                                                                                                     | [5459862] D-erythrose-4-phosphate 1 [17.508]                                                                                                                                                                                                                                                                            | 0.00195      | 0.11825 | -2.55   | 0.00030 | 0.07851 | -3.86   | 0.76720 | 1.00000 | -1.70   |
| LC-POS-MS | 141.0706     | 11.8                                                                                                                                                                                     | 5-Phenyl-1,3-pentadiyne; Norcapillene; 1,4-Methanoazulene; Boron, trifluoro(tetrahydrofuran)                                                                                                                                                                                                                            | 0.00009      | 0.08938 | -37.52  | 0.02411 | 1.00000 | -22.87  | 0.00072 | 0.11467 | -40.42  |
|           | 159.1174     | 11.8                                                                                                                                                                                     | Butadiene-styrene rubber; 4-Methyl-2-[(propan-2-yl)oxy]-1,3,2-dioxaborinane; 1,3-                                                                                                                                                                                                                                       | 0.00013      | 0.08938 | -24.13  | 0.05975 | 1.00000 | -13.69  | 0.00046 | 0.11467 | -26.43  |
|           | 145.1019     | 11.8                                                                                                                                                                                     | 2,2-Dimethyl-2H-indene; 4,4,6-Trimethyl-1,3,2-dioxaborinan-2-ol; Boric acid pinacol ester; 1H-                                                                                                                                                                                                                          | 0.00017      | 0.08938 | -16.25  | 0.04287 | 1.00000 | -13.51  | 0.00099 | 0.11467 | -18.20  |
|           | 218.1392     | 0.6                                                                                                                                                                                      | Propionylcarnitine;tert-Butyl 2-(hydroxymethyl)morpholine-4-carboxylate; ethyl 3-[(2-ethoxy-2-                                                                                                                                                                                                                          | 0.00020      | 0.08938 | -4.27   | 0.00362 | 1.00000 | -12.46  | 0.01220 | 0.13158 | -4.62   |
|           | 128.0628     | 11.8                                                                                                                                                                                     | 2-Fluoro-5-hydrazinylpyridine                                                                                                                                                                                                                                                                                           | 0.00024      | 0.08940 | -21.38  | 0.06085 | 1.00000 | -14.19  | 0.00107 | 0.11467 | -26.05  |
|           | 171.1175     | 11.8                                                                                                                                                                                     | 1,6,7-Trimethylnaphthalene; Aethusin,(3,4-Dimethylcyclopenta-1,3-dien-1-yl)benzene                                                                                                                                                                                                                                      | 0.00033      | 0.08940 | -18.83  | 0.03802 | 1.00000 | -12.57  | 0.00285 | 0.11467 | -19.07  |
|           | 269.2269     | 12.1                                                                                                                                                                                     | anhydroretinol,2-decyl-naphthalene                                                                                                                                                                                                                                                                                      | 0.00033      | 0.08940 | -79.69  | 0.11551 | 1.00000 | -46.53  | 0.00078 | 0.11467 | -105.65 |
| 177.1644  | 11.8         | (6E,8E)-4,6,8-Megastigmatriene; 1-Phenylheptane; 3,5,7-Trimethyl-2E,4E,6E,8E-decatetraene; 1-tert-Butyl-2-(propan-2-yl)benzene; 1,4-Diisopropyl-2-methylbenzene; 1-Hexyl-4-methylbenzene | 0.00035                                                                                                                                                                                                                                                                                                                 | 0.08940      | -30.46  | 0.05923 | 1.00000 | -22.37  | 0.00191 | 0.11467 | -34.69  |         |
| LC-NEG-MS | 349.0936     | 0.59                                                                                                                                                                                     | 3-Feruloyl-1,5-quinolactone; 6-[2,3-Dihydroxy-1-(hydroxymethyl)propyl]-1,2-dihydro-7-hydroxy-9-methoxy-cyclopenta[c][1]benzopyran-3,4-dione; CAY10648; 4-[(1-benzoyl-3-methyl-5-oxo-4H-pyrazol-4-yl)diazenyl]benzoic acid; 2,3-diphenyl-5-(trifluoromethyl)quinoxaline; N~1~,N~3~-Bis(2-nitrophenyl)benzene-1,3-diamine | 0.00031      | 0.09336 | -4.12   | 0.00741 | 0.33780 | -3.20   | 0.01633 | 1.00000 | -2.05   |
|           | 337.0936     | 0.59                                                                                                                                                                                     | Coumaroyl quinic acid, alpha-Hydrojuglone 4-O-b-D-glucoside, Hydrojuglone glucoside, 1-Caffeoyl-4-deoxyquinic acid; N-(tert-Butoxycarbonyl)-6-chloro-L-tryptophan; Benzhydryl 4-methylbenzenesulfonate; 1,2,4,5-Benzenetetracarboxylic acid, dipropyl ester<br>4-Methylumbelliferyl-galactopyranoside                   | 0.00060      | 0.09336 | -4.06   | 0.03935 | 0.80467 | -2.74   | 0.00708 | 1.00000 | -3.26   |
|           | 346.0544     | 0.63                                                                                                                                                                                     | 2'-Deoxyguanosine 5'-monophosphate;(1,3-dioxoisindol-2-yl)methyl 4-(difluoromethoxy)benzoate; Pamabrom [USAN:USP],Anthraquinone, 1-amino-4-hydroxy-2-(mercaptophenyl)-; 1H-Pyrazole-4-carboxamide, 4,5-dihydro-3,4-bis(4-chlorophenyl)-N-methyl-                                                                        | 0.00063      | 0.09336 | -4.17   | 0.00078 | 0.23035 | -11.91  | 0.23008 | 1.00000 | -3.17   |
|           | 845.6739     | 11.32                                                                                                                                                                                    | TG(104:16); TG(52:8)                                                                                                                                                                                                                                                                                                    | 0.00068      | 0.09336 | -4.87   | 0.00067 | 0.23035 | -10.10  | 0.26977 | 1.00000 | -1.26   |
|           | 402.0692     | 0.55                                                                                                                                                                                     | 1-[(2-bromophenyl)-(2-ethoxyphenyl)methyl]pyrrolidine-2-carboxylic Acid                                                                                                                                                                                                                                                 | 0.00079      | 0.09336 | -2.88   | 0.04738 | 0.83971 | -2.45   | 0.00821 | 1.00000 | -3.47   |

\*Fold change between HCC-C and adj.C





S2 Table (continue)

L  
C  
-  
P  
O  
S  
-  
M  
S

|          |      |                                                                                                                                                                                                                                                                                                                                                                                                                                                                                                                                                                                                                  |         |         |       |         |         |       |         |         |        |         |         |       |
|----------|------|------------------------------------------------------------------------------------------------------------------------------------------------------------------------------------------------------------------------------------------------------------------------------------------------------------------------------------------------------------------------------------------------------------------------------------------------------------------------------------------------------------------------------------------------------------------------------------------------------------------|---------|---------|-------|---------|---------|-------|---------|---------|--------|---------|---------|-------|
| 184.0741 | 10.4 | 4-Nitrosobiphenyl; Phosphocholine; 3-Dibenzofuranamine; 4-Hydroxycarbazole; 4-Benzoylpyridine; 2-Aminodiphenylene oxide; 6-Methoxy-2-naphthonitrile; 5-(Furan-3-yl)-1H-indole; 1-Hydroxycarbazole; Methanone, phenyl-2-pyridinyl-; 2-Propenal, 3-(2-quinolinyl)-; 6-(Furan-2-yl)-1H-indole                                                                                                                                                                                                                                                                                                                       | 0.00000 | 0.00003 | 2.44  | 0.00382 | 0.07345 | 2.46  | 0.00017 | 0.00793 | 2.87   | 0.04300 | 0.39475 | 2.13  |
| 624.3705 | 0.6  | Apicidin                                                                                                                                                                                                                                                                                                                                                                                                                                                                                                                                                                                                         | 0.01387 | 0.07104 | 2.34  | 0.97689 | 1.00000 | 1.87  | 0.25660 | 1.00000 | 1.94   | 0.01127 | 0.18676 | 3.01  |
| 524.6421 | 0.6  |                                                                                                                                                                                                                                                                                                                                                                                                                                                                                                                                                                                                                  | 0.01845 | 0.09108 | 2.24  | 0.96680 | 1.00000 | 1.91  | 0.08955 | 0.53312 | 2.11   | 0.08696 | 0.58297 | 2.46  |
| 633.5811 | 12.9 | 9-Octadecenoic acid (9Z)-, 2,2-dimethyl-1,3-propanediyl ester                                                                                                                                                                                                                                                                                                                                                                                                                                                                                                                                                    | 0.00005 | 0.00063 | 2.17  | 0.00947 | 0.12881 | 1.94  | 0.02420 | 0.21956 | 2.50   | 0.06155 | 0.47697 | 2.07  |
| 800.6152 | 10.1 | PC(37:2); PE(40:2)                                                                                                                                                                                                                                                                                                                                                                                                                                                                                                                                                                                               | 0.00134 | 0.00968 | 2.08  | 0.01357 | 0.16587 | 5.26  | 0.11703 | 0.62671 | 4.30   | 0.42523 | 1.00000 | 1.62  |
| 452.3733 | 1.3  | (11Z,14Z)-eicosadienoylcarnitine; 1-Octadecanaminium, N-ethyl-N,N-dimethyl-, ethyl sulfate                                                                                                                                                                                                                                                                                                                                                                                                                                                                                                                       | 0.00819 | 0.04524 | 2.05  | 0.06894 | 0.51167 | 4.89  | 0.52119 | 1.00000 | 1.81   | 0.17867 | 0.90305 | 2.40  |
| 706.5384 | 8.3  | PC(30:0); PE(33:0)                                                                                                                                                                                                                                                                                                                                                                                                                                                                                                                                                                                               | 0.00000 | 0.00003 | 1.95  | 0.00020 | 0.01361 | 2.71  | 0.00115 | 0.02647 | 4.05   | 0.09244 | 0.60378 | 1.65  |
| 786.5278 | 7.8  | PS(36:3)                                                                                                                                                                                                                                                                                                                                                                                                                                                                                                                                                                                                         | 0.00866 | 0.04711 | 1.92  | 0.13855 | 0.83568 | 1.87  | 0.44813 | 1.00000 | 2.25   | 0.13000 | 0.74441 | 2.09  |
| 229.1550 | 0.6  | L-isoleucyl-L-proline ; AC1NPXVC                                                                                                                                                                                                                                                                                                                                                                                                                                                                                                                                                                                 | 0.00097 | 0.00730 | 1.90  | 0.00358 | 0.06950 | 2.52  | 0.08477 | 0.51539 | 2.59   | 0.70753 | 1.00000 | 1.32  |
| 788.6166 | 10.4 | PC(36:1); PC(72:2); PE(39:1)                                                                                                                                                                                                                                                                                                                                                                                                                                                                                                                                                                                     | 0.00000 | 0.00005 | 1.90  | 0.00694 | 0.10500 | 1.70  | 0.00011 | 0.00699 | 2.18   | 0.13370 | 0.75426 | 1.75  |
| 744.4945 | 8.3  | 1-[6-[5]-ladderane-hexanoyl]-2-[8-[3]-ladderane-octanyl]-sn-glycerophosphoethanolamine, Pilocereine                                                                                                                                                                                                                                                                                                                                                                                                                                                                                                              | 0.00285 | 0.01838 | 1.86  | 0.00726 | 0.10779 | 2.47  | 0.17648 | 0.83009 | 2.01   | 0.70410 | 1.00000 | 1.03  |
| 786.6008 | 9.7  | PC(72:4), PC(36:2), PE(39:2), Dioloeylphosphatidylcholine, GPCho(18:2(2E,4E)/O-18:0)[U]                                                                                                                                                                                                                                                                                                                                                                                                                                                                                                                          | 0.00011 | 0.00120 | 1.82  | 0.00255 | 0.05720 | 2.24  | 0.04579 | 0.34973 | 2.30   | 0.22806 | 0.98270 | 1.46  |
| 762.5606 | 10.0 | PS(O-35:1); PS(P-35:0)                                                                                                                                                                                                                                                                                                                                                                                                                                                                                                                                                                                           | 0.01868 | 0.09182 | 1.73  | 0.99057 | 1.00000 | 1.12  | 0.14493 | 0.72828 | 1.98   | 0.03410 | 0.33203 | 1.62  |
| 655.5652 | 9.4  | 5-Hydroxy-7-methoxy-2-tritriacontyl-4H-1-benzopyran-4-one                                                                                                                                                                                                                                                                                                                                                                                                                                                                                                                                                        | 0.02420 | 0.11430 | 1.72  | 0.00132 | 0.03616 | 2.73  | 0.41905 | 1.00000 | 1.32   | 0.98015 | 1.00000 | 1.17  |
| 814.6320 | 10.5 | PC(38:2); PE(41:2)                                                                                                                                                                                                                                                                                                                                                                                                                                                                                                                                                                                               | 0.00092 | 0.00698 | 1.69  | 0.00483 | 0.08333 | 3.08  | 0.03028 | 0.26524 | 1.82   | 0.89013 | 1.00000 | 1.53  |
| 909.5456 | 8.6  | PI(40:7); 7-Hydroxychlorophyll a; Bacterio-chlorophyll b                                                                                                                                                                                                                                                                                                                                                                                                                                                                                                                                                         | 0.29443 | 0.77632 | 1.68  | 0.97623 | 1.00000 | 1.26  | 0.00596 | 0.07874 | 4.12   | 0.69662 | 1.00000 | -1.33 |
| 102.0921 | 0.6  | 5-Aminopentanal; N-butylformamide; pentanamide; 2-Methylpropanal O-methylloxime; 4-Methylaminobutanal; 3-Methylbutyraldehyde oxime;(E)-2-Methylbutanal oxime;Betaine aldehyde; Diethylformamide; tetrahydro-2H-pyran-3-amine; (3R)-N-Methyloxolan-3-amine; N-Propylacetamide; Piperidin-4-ol; 4-Methylmorpholine; Formamide, N-(1-methylpropyl)-; 2,3,4-trimethyl-1,3-oxazetidine; 4,4-Dimethylloxazolidine; 4-Ethylloxazolidine; 2-methylmorpholine; 4-Aminotetrahydropyran; [(1S,2S)-2-(Aminomethyl)cyclopropyl]methanol; 3-Methoxycyclobutan-1-amine; Butanamide, 3-methyl-; Pentanamide; N-Ethylpropionamide | 0.00003 | 0.00040 | 1.68  | 0.63312 | 1.00000 | 1.37  | 0.01999 | 0.19559 | 2.17   | 0.00007 | 0.00658 | 3.38  |
| 605.5499 | 12.8 | 9-Octadecenoic acid (9Z)-, 1-methyl-1,2-ethanediy ester                                                                                                                                                                                                                                                                                                                                                                                                                                                                                                                                                          | 0.00411 | 0.02494 | 1.68  | 0.02234 | 0.23735 | 1.73  | 0.17457 | 0.82794 | 1.35   | 0.58556 | 1.00000 | 1.50  |
| 748.5844 | 9.9  | PC(33:0); PE(36:0); Distearyl phosphatidyl ethanolamine; phosphatidylethanolamine; PE(34:0)                                                                                                                                                                                                                                                                                                                                                                                                                                                                                                                      | 0.00825 | 0.04531 | 1.65  | 0.04041 | 0.36953 | 1.74  | 0.50458 | 1.00000 | 1.51   | 0.29938 | 1.00000 | 1.44  |
| 751.5260 | 10.4 | PA(40:5)                                                                                                                                                                                                                                                                                                                                                                                                                                                                                                                                                                                                         | 0.00364 | 0.02252 | 1.64  | 0.07827 | 0.56088 | 1.55  | 0.08516 | 0.51640 | 1.61   | 0.56397 | 1.00000 | 1.55  |
| 697.4771 | 9.5  | 1,2-Di-(9Z,12Z-octadecadienoyl)-sn-glycero-3-phosphate; PA(36:4); 1-(Hexadecanoyloxy)-3-(phosphonoxy)propan-2-yl icoso-5,8,11,14-tetraenoate                                                                                                                                                                                                                                                                                                                                                                                                                                                                     | 0.00292 | 0.01870 | 1.56  | 0.02184 | 0.23490 | 1.64  | 0.36388 | 1.00000 | 1.40   | 0.22310 | 0.98154 | 1.61  |
| 734.5696 | 9.5  | PC(32:0); PE(35:0); 1,2-dipalmitoyl-sn-glycero-3-PC; Colfosceril palmitate; 1,3-Dipalmitoyl-2-phosphatidylcholine;(7S)-7-(Hexadecanoyloxy)-4-hydroxy-N,N,N-trimethyl-10-oxo-3,5,9-trioxa-4-phosphapentacosan-1-aminium 4-oxide                                                                                                                                                                                                                                                                                                                                                                                   | 0.00014 | 0.00143 | 1.54  | 0.00470 | 0.08200 | 1.53  | 0.11455 | 0.62053 | 1.59   | 0.07542 | 0.53438 | 1.33  |
| 762.6007 | 10.3 | PC(34:0); PE(37:0); 1,1-Cyclobutanedicarboxamide, N,N'-bis(2,4,6-tribromophenyl)-                                                                                                                                                                                                                                                                                                                                                                                                                                                                                                                                | 0.01292 | 0.06711 | 1.53  | 0.07931 | 0.56656 | 1.38  | 0.37890 | 1.00000 | 1.36   | 0.42236 | 1.00000 | 1.16  |
| 259.1697 | 8.8  | Linalyl benzoate; Geranyl benzoate; Falcariolone; Ginsenoyne; Flavidulol B; (all-E)-1,8,10-Heptadecatriene-4,6-diyne-3,12-diol; 5,8,11-heptadecatriynoic acid; 1,9Z,16-heptadecatrien-4,6-diyne-3,8-diol; CICUTOXIN; Enanthotoxin; O-1602; O-1821; Cicutoxin; 5,8,11-Heptadecatriynoic acid; heptadeca-1,9Z,16-trien-4,6-diyne-3,8-diol; Benzyl 2,2-dimethyl-3-(2-methylprop-1-en-1-yl)cyclopropane-1-carboxylate                                                                                                                                                                                                | 0.00285 | 0.01838 | 1.50  | 0.32143 | 1.00000 | 1.34  | 0.00555 | 0.07558 | 2.22   | 0.63348 | 1.00000 | 1.26  |
| 188.0838 | 8.8  | Phenylpropanolamine hydrochloride; 4-(Pyridin-4-yl)butan-1-ol--hydrogen chloride (1/1)                                                                                                                                                                                                                                                                                                                                                                                                                                                                                                                           | 0.00037 | 0.00320 | 1.46  | 0.98955 | 1.00000 | 1.04  | 0.00029 | 0.01101 | 2.01   | 0.04547 | 0.40799 | 1.18  |
| 848.5391 | 8.7  | PS(41:7)                                                                                                                                                                                                                                                                                                                                                                                                                                                                                                                                                                                                         | 0.01298 | 0.06730 | 1.46  | 0.22982 | 1.00000 | 1.76  | 0.45274 | 1.00000 | 1.37   | 0.12940 | 0.74326 | 1.67  |
| 786.6537 | 10.3 | SM(40:2)                                                                                                                                                                                                                                                                                                                                                                                                                                                                                                                                                                                                         | 0.01326 | 0.06843 | 1.46  | 0.07216 | 0.52502 | 2.39  | 0.37520 | 1.00000 | 1.66   | 0.44245 | 1.00000 | 1.27  |
| 137.0467 | 0.6  | Hypoxanthine; tetrazolo[1,5-a]pyridin-8-ol; 4H-Pyrazolo[3,4-b]pyrazin-4-ol; 3-Nitrobenzyl radical                                                                                                                                                                                                                                                                                                                                                                                                                                                                                                                | 0.00494 | 0.02935 | 1.46  | 0.00134 | 0.03616 | 3.81  | 0.07677 | 0.48751 | 1.80   | 0.98892 | 1.00000 | 1.02  |
| 785.6612 | 12.4 | TG(94:8); TG(47:4)                                                                                                                                                                                                                                                                                                                                                                                                                                                                                                                                                                                               | 0.01389 | 0.07104 | 1.36  | 0.53273 | 1.00000 | 1.43  | 0.07998 | 0.49953 | 1.62   | 0.34468 | 1.00000 | 1.26  |
| 365.1575 | 0.6  | Gibberellin A55; (7R*,8R*)-3-Methoxy-3',4,7,9,9'-pentahydroxy-8,4'-oxyneolignan; N-Acetylmuramoyl-Ala; Vernomygdin; Zexbrevin B; 1-methoxy-4-(3-methylsulfinyl-1,1-diphenylpropan-2-yl)benzene; Methyltris(phenylmethoxy)silane                                                                                                                                                                                                                                                                                                                                                                                  | 0.01701 | 0.08472 | 1.21  | 0.40947 | 1.00000 | 1.26  | 0.05246 | 0.38434 | 1.01   | 0.65691 | 1.00000 | 1.41  |
| 779.5575 | 9.6  | PA(42:5); PS(34:1)                                                                                                                                                                                                                                                                                                                                                                                                                                                                                                                                                                                               | 0.01962 | 0.09624 | -1.15 | 0.02211 | 0.23624 | -1.67 | 0.92629 | 1.00000 | -1.43  | 0.28318 | 1.00000 | -1.11 |
| 775.5542 | 0.5  | PG(36:2); PG(72:4); LBPA(18:1(9Z)/18:1(9Z))                                                                                                                                                                                                                                                                                                                                                                                                                                                                                                                                                                      | 0.64470 | 1.00000 | -1.20 | 0.94146 | 1.00000 | 17.74 | 0.00484 | 0.06879 | -57.47 | 0.58823 | 1.00000 | 1.46  |

S2 Table (continue)

L  
C  
-  
P  
O  
S  
-  
M  
S

|          |      |                                                                                                                                                                                                                                                                                                                           |         |         |        |         |         |        |         |         |        |         |         |        |
|----------|------|---------------------------------------------------------------------------------------------------------------------------------------------------------------------------------------------------------------------------------------------------------------------------------------------------------------------------|---------|---------|--------|---------|---------|--------|---------|---------|--------|---------|---------|--------|
| 660.6643 | 12.2 | Cer(m18:1(4E)/26:1(17Z))                                                                                                                                                                                                                                                                                                  | 0.00294 | 0.01880 | -1.22  | 0.05541 | 0.45076 | -1.99  | 0.06848 | 0.45770 | -1.75  | 0.50845 | 1.00000 | 1.04   |
| 184.0743 | 8.8  | 4-Nitrosobiphenyl;Phosphocholine;3-Dibenzofuranamine;4-Hydroxycarbazole;4-Benzoylpyridine;2-Aminodiphenylene oxide;6-Methoxy-2-naphthonitrile;5-(Furan-3-yl)-1H-indole;4-Dibenzofuranamine;Methanone, phenyl-2-pyridinyl;-2-Propenal, 3-(2-quinolinyl)-;6-(Furan-2-yl)-1H-indole                                          | 0.00009 | 0.00099 | -1.24  | 0.13688 | 0.82781 | -1.18  | 0.00608 | 0.07977 | -2.14  | 0.02843 | 0.31248 | -1.14  |
| 786.6020 | 9.8  | PC(72:4);PC(36:2);PE(39:2);Dioleoylphosphatidylcholine; GPCho(18:2(2E,4E)/O-18:0)[U];1,2-Dioleoyl PC                                                                                                                                                                                                                      | 0.01499 | 0.07579 | -1.26  | 0.27215 | 1.00000 | -1.27  | 0.37814 | 1.00000 | -1.29  | 0.17594 | 0.89579 | -1.20  |
| 832.5851 | 8.5  | PC(40:7)                                                                                                                                                                                                                                                                                                                  | 0.00971 | 0.05172 | -1.34  | 0.31469 | 1.00000 | -1.41  | 0.43241 | 1.00000 | -1.08  | 0.06382 | 0.48472 | -1.34  |
| 184.0742 | 9.8  | 4-Nitrosobiphenyl; Phosphocholine; 3-Dibenzofuranamine; 4-Hydroxycarbazole; 4-Benzoylpyridine; 2-Aminodiphenylene oxide; 6-Methoxy-2-naphthonitrile; 5-(Furan-3-yl)-1H-indole; 4-Dibenzofuranamine;Methanone, phenyl-2-pyridinyl;- 2-Propenal, 3-(2-quinolinyl)-                                                          | 0.00536 | 0.03136 | -1.37  | 0.56243 | 1.00000 | -1.30  | 0.09369 | 0.54778 | -1.55  | 0.08217 | 0.56581 | -1.49  |
| 768.5540 | 9.9  | PC(35:4); PE(38:4); PE(36:4); PE(76:8); PE(P-38:4)                                                                                                                                                                                                                                                                        | 0.02031 | 0.09920 | -1.37  | 0.75613 | 1.00000 | 1.18   | 0.58121 | 1.00000 | -1.36  | 0.01920 | 0.25155 | -1.56  |
| 125.0006 | 8.8  | Phosphonoacetaldehyde                                                                                                                                                                                                                                                                                                     | 0.00085 | 0.00659 | -1.40  | 0.90157 | 1.00000 | 1.01   | 0.00745 | 0.09301 | -2.43  | 0.01742 | 0.24129 | -1.29  |
| 758.5697 | 8.8  | PC(34:2); PC(68:4); PE(37:2); PE(72:4); PE(36:2)                                                                                                                                                                                                                                                                          | 0.00003 | 0.00037 | -1.41  | 0.08903 | 0.61083 | -1.28  | 0.00156 | 0.03239 | -2.60  | 0.02807 | 0.30996 | -1.28  |
| 589.5184 | 12.6 | Mayolene-20                                                                                                                                                                                                                                                                                                               | 0.00227 | 0.01520 | -1.41  | 0.09007 | 0.61463 | -1.72  | 0.02656 | 0.23904 | -2.02  | 0.68066 | 1.00000 | -1.16  |
| 561.4878 | 12.6 | Mayolene-18; 2-methylbacteriohopane-32,33,34,35-tetrol                                                                                                                                                                                                                                                                    | 0.00149 | 0.01051 | -1.43  | 0.05271 | 0.43500 | -1.90  | 0.05473 | 0.39335 | -3.17  | 0.35437 | 1.00000 | -1.41  |
| 603.5350 | 10.0 | DG(O-34:1)                                                                                                                                                                                                                                                                                                                | 0.01865 | 0.09182 | -1.43  | 0.60174 | 1.00000 | -1.31  | 0.46609 | 1.00000 | -1.61  | 0.04896 | 0.43053 | -1.25  |
| 780.5508 | 9.0  | PC(36:5); PE(39:5)                                                                                                                                                                                                                                                                                                        | 0.00252 | 0.01658 | -1.44  | 0.52710 | 1.00000 | -1.22  | 0.11583 | 0.62320 | -1.43  | 0.02381 | 0.28303 | -1.59  |
| 830.5662 | 9.1  | PC(40:8); PC(80:16)                                                                                                                                                                                                                                                                                                       | 0.00320 | 0.02016 | -1.44  | 0.16326 | 0.91983 | -1.19  | 0.74904 | 1.00000 | -1.77  | 0.00627 | 0.13791 | -2.55  |
| 830.5663 | 8.9  | PC(40:8); PC(80:16)                                                                                                                                                                                                                                                                                                       | 0.01746 | 0.08678 | -1.45  | 0.67797 | 1.00000 | -1.36  | 0.19562 | 0.88375 | -1.23  | 0.12746 | 0.73768 | -2.17  |
| 575.5033 | 12.5 | Montecristin, Mayolene-19, Ethylenebis(dioctylphosphine) dioxide                                                                                                                                                                                                                                                          | 0.00003 | 0.00037 | -1.47  | 0.01468 | 0.17517 | -1.98  | 0.00035 | 0.01231 | -2.87  | 0.40998 | 1.00000 | -1.19  |
| 730.5380 | 7.3  | PC(32:2); PC(64:4); PE(35:2)                                                                                                                                                                                                                                                                                              | 0.00369 | 0.02271 | -1.50  | 0.75045 | 1.00000 | -1.22  | 0.07962 | 0.49953 | -2.19  | 0.02747 | 0.30488 | -1.67  |
| 269.2269 | 12.1 | anhydroretinol, 1,4-Dimethyl-5-octyl-naphthalene; 2-decyl-naphthalene                                                                                                                                                                                                                                                     | 0.00000 | 0.00000 | -41.05 | 0.00001 | 0.00454 | -38.55 | 0.00000 | 0.00104 | -42.71 | 0.00000 | 0.00044 | -79.39 |
| 716.7480 | 9.1  | Hydrocinnamic acid, 4-(4-hydroxy-3-iodophenoxy)-3,5-diiodo-, sulfate                                                                                                                                                                                                                                                      | 0.00094 | 0.00711 | -24.42 | 0.20407 | 1.00000 | -23.91 | 0.03298 | 0.28618 | -10.83 | 0.09126 | 0.59775 | -19.55 |
| 141.0706 | 11.8 | 5-Phenyl-1,3-pentadiene; Norcapillene; 1,4-Methanoazulene; Boron, trifluoro(tetrahydrofuran)-, (T-4)-                                                                                                                                                                                                                     | 0.00000 | 0.00000 | -15.91 | 0.00001 | 0.00454 | -14.54 | 0.00005 | 0.00481 | -15.12 | 0.00000 | 0.00034 | -51.82 |
| 873.0201 | 12.5 | Ubistatin A                                                                                                                                                                                                                                                                                                               | 0.00000 | 0.00000 | -14.81 | 0.00028 | 0.01621 | -12.45 | 0.00000 | 0.00094 | -77.72 | 0.07005 | 0.51459 | -2.44  |
| 875.1823 | 12.6 | Quercetin 3-(2''-caffeoylglucoside)-(1->2)-(6''-malonylglucoside); Monodemalonylsalviadelphin                                                                                                                                                                                                                             | 0.00000 | 0.00000 | -14.56 | 0.00003 | 0.00461 | -13.39 | 0.00000 | 0.00011 | -66.54 | 0.00292 | 0.08145 | -4.13  |
| 414.3007 | 0.7  | N-Docosahexaenoyl GABA; N-docosahexaenoyl GABA; N-oleoyl methionine                                                                                                                                                                                                                                                       | 0.00043 | 0.00360 | -13.12 | 0.42796 | 1.00000 | -2.81  | 0.00650 | 0.08400 | -19.94 | 0.05353 | 0.44274 | -18.40 |
| 177.1644 | 11.8 | (6E,8E)-4,6,8-Megastigmatriene; 1-Phenylheptane; 1-Methyl-2-n-hexylbenzene; 3,5,7-Trimethyl-2E,4E,6E,8E-decatetraene; 1,2,3-Triethyl-4-methylbenzene; 1-tert-Butyl-2-(propan-2-yl)benzene; 5-tert-Butyl-1,2,3-trimethylbenzene; 1,4-Diisopropyl-2-methylbenzene; 1-Methyl-2,4-diisopropylbenzene; 1-Hexyl-4-methylbenzene | 0.00000 | 0.00000 | -12.38 | 0.00020 | 0.01361 | -8.46  | 0.00002 | 0.00291 | -9.64  | 0.00001 | 0.00195 | -31.39 |
| 159.1174 | 11.8 | Butadiene-styrene rubber; 1,2-Bis(1-methylethenyl)benzene; 4-Methyl-2-[(propan-2-yl)oxy]-1,3,2-dioxaborinane; 1,3-Diisopropenylbenzene; 1,4-Bis(1-methylethenyl)benzene; 4-Phenyl-1-cyclohexene                                                                                                                           | 0.00000 | 0.00000 | -12.29 | 0.00001 | 0.00454 | -12.26 | 0.00007 | 0.00561 | -10.48 | 0.00000 | 0.00043 | -31.55 |
| 762.5069 | 7.8  | PE(38:7)                                                                                                                                                                                                                                                                                                                  | 0.00000 | 0.00001 | -11.86 | 0.00117 | 0.03467 | -12.55 | 0.00140 | 0.02981 | -11.43 | 0.00147 | 0.05506 | -4.98  |
| 792.5530 | 7.5  | PC(37:6); PE(40:6); PE(P-40:6)                                                                                                                                                                                                                                                                                            | 0.00000 | 0.00000 | -10.89 | 0.00017 | 0.01353 | -22.62 | 0.00037 | 0.01293 | -15.94 | 0.00949 | 0.17291 | -7.08  |
| 128.0628 | 11.8 | 2-Fluoro-5-hydrazinylpyridine                                                                                                                                                                                                                                                                                             | 0.00000 | 0.00000 | -10.75 | 0.00008 | 0.00736 | -10.46 | 0.00012 | 0.00699 | -7.65  | 0.00000 | 0.00043 | -31.68 |
| 337.2740 | 11.2 | Pregnanetriol; 5beta-Pregnane-3alpha,17alpha,20alpha-triol; 3-Methyl-5-pentyl-2-furanundecanoic acid; Isolinderanolide; 2alpha-(Hydroxymethyl)-17-methyl-5alpha-androstane-3beta,17beta-diol; 2,2'-(1R,2R)-Cyclohexane-1,2-diyl)bis(4,4,5,5-tetramethyl-1,3,2-dioxaborolane)                                              | 0.00000 | 0.00000 | -10.19 | 0.00018 | 0.01361 | -3.75  | 0.00000 | 0.00011 | -35.11 | 0.00018 | 0.01187 | -9.78  |
| 171.1175 | 11.8 | 1,6,7-Trimethylnaphthalene; Aethusin;(3,4-Dimethylcyclopenta-1,3-dien-1-yl)benzene; 2-Isopropyl-naphthalene; 1-Ethyl-8-methylnaphthalene                                                                                                                                                                                  | 0.00000 | 0.00000 | -9.93  | 0.00004 | 0.00548 | -9.44  | 0.00025 | 0.01019 | -7.31  | 0.00000 | 0.00053 | -25.62 |
| 173.1330 | 11.8 | 1,2-Dihydro-1,1,6-trimethylnaphthalene; 2-Ethoxy-4,4,6-trimethyl-1,3,2-dioxaborinane; 2,3,4,4a,9,9a-Hexahydro-1H-fluorene                                                                                                                                                                                                 | 0.00000 | 0.00000 | -9.85  | 0.00021 | 0.01361 | -8.99  | 0.00041 | 0.01301 | -8.72  | 0.00002 | 0.00287 | -31.43 |
| 671.5600 | 11.1 | LDG(40:5)                                                                                                                                                                                                                                                                                                                 | 0.00000 | 0.00001 | -9.51  | 0.00852 | 0.11904 | -4.41  | 0.00052 | 0.01525 | -13.19 | 0.00134 | 0.05363 | -9.99  |
| 714.5063 | 8.2  | PE(34:3); PC(31:3)                                                                                                                                                                                                                                                                                                        | 0.00000 | 0.00001 | -9.22  | 0.00670 | 0.10282 | -7.05  | 0.00088 | 0.02160 | -10.26 | 0.00311 | 0.08451 | -3.92  |
| 304.3004 | 1.2  | Cetylpyridinium; 1-hexadecylpyridinium; BENZALKONIUM                                                                                                                                                                                                                                                                      | 0.00083 | 0.00648 | -8.77  | 0.05690 | 0.45796 | -7.91  | 0.15084 | 0.74476 | -7.88  | 0.06503 | 0.49227 | -20.87 |
| 808.5121 | 6.8  | PS(38:6)                                                                                                                                                                                                                                                                                                                  | 0.00002 | 0.00027 | -8.58  | 0.00040 | 0.01971 | -14.55 | 0.07346 | 0.47573 | -6.38  | 0.05332 | 0.44274 | -10.21 |

S2 Table (continue)

L  
C  
-  
P  
O  
S  
-  
M  
S

|          |      |                                                                                                                                                                                                                                                                                                                                                                                                                                                     |         |         |       |         |         |        |         |         |        |         |         |        |
|----------|------|-----------------------------------------------------------------------------------------------------------------------------------------------------------------------------------------------------------------------------------------------------------------------------------------------------------------------------------------------------------------------------------------------------------------------------------------------------|---------|---------|-------|---------|---------|--------|---------|---------|--------|---------|---------|--------|
| 337.2741 | 5.1  | Pregnanetriol; 5beta-Pregnane-3alpha,17alpha,20alpha-triol; 3-Methyl-5-pentyl-2-furanundecanoic acid; Isolinderanolide; 2alpha-(Hydroxymethyl)-17-methyl-5alpha-androstane-3beta,17beta-diol; 2,2'-[(1R,2R)-Cyclohexane-1,2-diy]bis(4,4,5,5-tetramethyl-1,3,2-dioxaborolane)                                                                                                                                                                        | 0.00000 | 0.00000 | -8.56 | 0.00225 | 0.05308 | -9.07  | 0.00175 | 0.03580 | -7.45  | 0.00009 | 0.00824 | -12.86 |
| 829.7146 | 11.7 | SM(43:1)                                                                                                                                                                                                                                                                                                                                                                                                                                            | 0.00000 | 0.00000 | -8.36 | 0.00100 | 0.03260 | -10.92 | 0.00027 | 0.01057 | -9.63  | 0.00232 | 0.07129 | -6.31  |
| 145.1019 | 11.8 | 2,2-Dimethyl-2H-indene; 4,4,6-Trimethyl-1,3,2-dioxaborinan-2-ol; Boric acid pinacol ester; 1H-Cyclobut(f)indene, 2,4,5,6-tetrahydro-; Bicyclo(4.4.1)undeca-1,3,5,8-tetralene                                                                                                                                                                                                                                                                        | 0.00000 | 0.00000 | -7.99 | 0.00002 | 0.00454 | -7.61  | 0.00011 | 0.00699 | -7.29  | 0.00000 | 0.00041 | -20.77 |
| 341.3053 | 11.2 | Polyoxyethylene (600) monoricinoleate; 2-oxo-heneicosanoic acid; Glycidyl stearate                                                                                                                                                                                                                                                                                                                                                                  | 0.00000 | 0.00000 | -7.79 | 0.00007 | 0.00684 | -3.32  | 0.00000 | 0.00026 | -13.32 | 0.00014 | 0.01040 | -7.59  |
| 286.2017 | 0.6  | 2-Octenoylcarnitine; (2E)-octenoylcarnitine; 2-octenoyl-L-carnitine; 1-tert-Butyl 4-ethyl 4-ethylpiperidine-1,4-dicarboxylate                                                                                                                                                                                                                                                                                                                       | 0.00003 | 0.00045 | -7.76 | 0.04497 | 0.39538 | -3.40  | 0.00735 | 0.09237 | -8.59  | 0.01970 | 0.25155 | -6.40  |
| 778.5380 | 9.2  | PC(36:6); PC(72:12); PE(39:6)                                                                                                                                                                                                                                                                                                                                                                                                                       | 0.00000 | 0.00007 | -7.22 | 0.00359 | 0.06950 | -7.98  | 0.00588 | 0.07874 | -9.54  | 0.01203 | 0.19466 | -2.89  |
| 779.5409 | 9.2  | 1,28-Octacosanediol diferulate                                                                                                                                                                                                                                                                                                                                                                                                                      | 0.00000 | 0.00004 | -7.08 | 0.00300 | 0.06321 | -8.62  | 0.00321 | 0.05096 | -8.86  | 0.00876 | 0.16691 | -2.78  |
| 175.1487 | 11.8 | 5,7alpha-Dihydro-1,4,4,7a-tetramethyl-4H-indene; 1,2,3,4-Tetrahydro-1,5,7-trimethylnaphthalene; alpha-Ionene; 1-Methyl-4-(1-methyl-2-propenyl)-benzene; 1,2,3,4-tetrahydro-2,5,8-trimethyl naphthalene; 1,2,3,4-Tetrahydro-1,1,6-trimethylnaphthalene; 2,2,6-Trimethyl-1,2,3,4-tetrahydronaphthalene; Benzene, (1-(1,1-dimethylethyl)cyclopropyl)-                                                                                                  | 0.00000 | 0.00000 | -6.67 | 0.00056 | 0.02343 | -7.02  | 0.00295 | 0.04820 | -5.28  | 0.00004 | 0.00440 | -16.60 |
| 621.4872 | 7.8  | 1-(6-[5]-ladderane-hexanoyl)-2-(8-[3]-ladderane-octanyl)-sn-glycerol; PA(O-31:0)                                                                                                                                                                                                                                                                                                                                                                    | 0.00000 | 0.00000 | -6.60 | 0.00003 | 0.00461 | -9.56  | 0.00099 | 0.02353 | -5.64  | 0.00053 | 0.02822 | -6.33  |
| 832.5845 | 8.6  | PC(40:7)                                                                                                                                                                                                                                                                                                                                                                                                                                            | 0.00000 | 0.00000 | -6.25 | 0.00010 | 0.00881 | -5.90  | 0.00011 | 0.00699 | -3.88  | 0.00012 | 0.01016 | -5.70  |
| 203.1799 | 11.1 | (6alpha,7alpha,10alpha)-1(5),3-Aromadendradiene; beta-Spathulene; (1alpha,6alpha,7alphaH)-2,4(15)-Copadiene; 1,4,9-Cadinatriene; beta-Vatirenene; alpha-Curcumene; (-)-alpha-Curcumene; (E)-Calamene; Cuparene; Patchoula-2,4-diene; 2-Dodecanone, 12-fluoro-                                                                                                                                                                                       | 0.00000 | 0.00000 | -5.83 | 0.00294 | 0.06278 | -3.82  | 0.00075 | 0.01985 | -5.22  | 0.00023 | 0.01338 | -6.63  |
| 573.4876 | 8.2  | Dieporeticenin                                                                                                                                                                                                                                                                                                                                                                                                                                      | 0.00002 | 0.00026 | -5.78 | 0.04297 | 0.38067 | -4.87  | 0.01694 | 0.17232 | -3.88  | 0.01414 | 0.21260 | -3.49  |
| 789.6836 | 11.2 | SM(40:0)                                                                                                                                                                                                                                                                                                                                                                                                                                            | 0.00003 | 0.00044 | -5.78 | 0.00501 | 0.08416 | -8.93  | 0.00358 | 0.05419 | -11.07 | 0.24997 | 1.00000 | -2.52  |
| 761.6519 | 10.6 | SM(38:0)                                                                                                                                                                                                                                                                                                                                                                                                                                            | 0.00004 | 0.00051 | -5.71 | 0.04552 | 0.39716 | -5.91  | 0.00388 | 0.05728 | -6.91  | 0.05564 | 0.45263 | -3.39  |
| 361.2742 | 11.1 | 1alpha,23-dihydroxy-24,25,26,27-tetranorvitamin D3; 1alpha,23-dihydroxy-24,25,26,27-tetranorcholecalciferol; 17beta-Hydroxy-6beta-methyl; 5alpha-androstan-3-one propionate; 3beta-Hydroxy-5alpha-pregnan-20-one acetate; 1f1t,23-dihydroxy-24,25,26,27-tetranorvitamin D3; 1f1t,23-dihydroxy-24,25,26,27-tetranorcholecalciferol; O-Arachidonoyl Glycidol; 12-shogaol; Dromostanolone propionate;(Oxiran-2-yl)methyl icosane-5,8,11,14-tetraenoate | 0.00000 | 0.00001 | -5.65 | 0.00491 | 0.08375 | -2.77  | 0.00142 | 0.02999 | -7.36  | 0.00059 | 0.02976 | -8.76  |
| 645.5344 | 11.2 | N-palmitoyl-D-sphingosyl-1-(2-aminoethyl)phosphonate                                                                                                                                                                                                                                                                                                                                                                                                | 0.00000 | 0.00000 | -5.64 | 0.00012 | 0.01058 | -2.99  | 0.00000 | 0.00044 | -7.03  | 0.00023 | 0.01338 | -3.70  |
| 820.5843 | 8.9  | PE(42:6); PC(39:6)                                                                                                                                                                                                                                                                                                                                                                                                                                  | 0.00000 | 0.00007 | -5.51 | 0.00228 | 0.05330 | -6.66  | 0.00590 | 0.07874 | -6.86  | 0.01716 | 0.23914 | -2.97  |
| 218.1392 | 0.6  | Propionylcarnitine; tert-Butyl 2-(hydroxymethyl)morpholine-4-carboxylate; ethyl 3-[[2-ethoxy-2-oxoethyl)-methylamino]propanoate; 4-(4-Methylpiperazin-1-yl)-7H-pyrrolo[2,3-d]pyrimidine; butyl 2-(ethylcarbamoyloxy)propanoate; Zindotrine; Diethyl 3,3'-Iminodipropionate; Guanidine, 1-butyl-2-cyano-3-(3-pyridyl)-                                                                                                                               | 0.00000 | 0.00004 | -5.38 | 0.00034 | 0.01806 | -6.53  | 0.00154 | 0.03235 | -4.50  | 0.07789 | 0.54289 | -5.03  |
| 786.5035 | 8.6  | PE(40:9)                                                                                                                                                                                                                                                                                                                                                                                                                                            | 0.00003 | 0.00043 | -5.28 | 0.01613 | 0.18723 | -3.73  | 0.06801 | 0.45730 | -6.19  | 0.00485 | 0.11555 | -6.03  |
| 133.1019 | 11.8 | p-Mentha-1,3,5,8-tetraene; Tetralin; Dicyclopentadiene; 3,4-Dimethylstyrene; Benzene, 1-ethenyl-3,5-dimethyl- (9CI); (1-Fluorocyclohexyl)methanol; Dispiro(2.0.2.4)deca-1,5-diene; 1-Methyl-4-(prop-1-en-2-yl)benzene; 1,4-Cyclohexadiene, 1,4-dimethyl-3,6-bis(methylene)-                                                                                                                                                                         | 0.00000 | 0.00000 | -5.25 | 0.00034 | 0.01806 | -4.80  | 0.00039 | 0.01295 | -4.78  | 0.00002 | 0.00260 | -14.10 |
| 814.5342 | 9.7  | PE(42:9)                                                                                                                                                                                                                                                                                                                                                                                                                                            | 0.00000 | 0.00003 | -5.22 | 0.00041 | 0.01971 | -10.44 | 0.02188 | 0.20753 | -5.21  | 0.00282 | 0.07970 | -3.79  |
| 337.2739 | 6.9  | Pregnanetriol; 5beta-Pregnane-3alpha,17alpha,20alpha-triol; 3-Methyl-5-pentyl-2-furanundecanoic acid; Isolinderanolide; 2alpha-(Hydroxymethyl)-17-methyl-5alpha-androstane-3beta,17beta-diol; 2,2'-[(1R,2R)-Cyclohexane-1,2-diy]bis(4,4,5,5-tetramethyl-1,3,2-dioxaborolane)                                                                                                                                                                        | 0.00000 | 0.00000 | -5.12 | 0.00707 | 0.10561 | -3.91  | 0.00371 | 0.05544 | -8.56  | 0.00004 | 0.00405 | -11.50 |
| 769.4774 | 8.3  | PA(42:10); Pittoside A; HMT-toxin                                                                                                                                                                                                                                                                                                                                                                                                                   | 0.00000 | 0.00007 | -5.10 | 0.01285 | 0.16115 | -5.63  | 0.00236 | 0.04207 | -5.73  | 0.00958 | 0.17291 | -1.95  |

S2 Table (continue)

L  
C  
-  
P  
O  
S  
-  
M  
S

|          |      |                                                                                                                                                                                                                                                                                                                                                                                                                                                                                                                                                                                                                                                                                                                                                                                                                                                                                                                                                                                                                                                                                                                                                            |         |         |       |         |         |        |         |         |        |         |         |        |
|----------|------|------------------------------------------------------------------------------------------------------------------------------------------------------------------------------------------------------------------------------------------------------------------------------------------------------------------------------------------------------------------------------------------------------------------------------------------------------------------------------------------------------------------------------------------------------------------------------------------------------------------------------------------------------------------------------------------------------------------------------------------------------------------------------------------------------------------------------------------------------------------------------------------------------------------------------------------------------------------------------------------------------------------------------------------------------------------------------------------------------------------------------------------------------------|---------|---------|-------|---------|---------|--------|---------|---------|--------|---------|---------|--------|
| 287.2375 | 11.1 | Vitamin A;(x)-p-Menth-1-en-4-yl 5-isopropyl-2-methylphenyl ether; Abietinal; ent-16-Kauren-19-al; ent-kaur-16-en-19-al; Kaur-16-en-18-al;ent-19-Trachylobanal;8,13-Abietadien-18-al; Palustradienal;Helicallenal;levopimaradienal;dehydroabietadienol;(+) Totarol;isopimara-7,15-dienal; 9beta-Pimara-7,15-dien-19-al;(-)-13(16),14-Spongiadiene;(+) -15-Beyeren-3-one;pregna-5-20-dien-3beta-ol;Ferruginol;Neobietal;Retinol;TOTAROL;Sandaracopimarinal;(3beta)-17-Methylideneandrost-5-en-3-ol;6'-(tert-Butyl)-2',3'-dihydro-3',3'-dimethylspiro(cyclohexane-1,1'-(1H)indene)-5'-ol;1,2,3,6,7,8-Hexahydro-1,1,3,3,6,6,8,8-octamethyl-as-indacen-4-ol;Totarol;Kaurenal;levopimaral                                                                                                                                                                                                                                                                                                                                                                                                                                                                        | 0.00000 | 0.00001 | -5.10 | 0.00429 | 0.07872 | -2.59  | 0.00086 | 0.02160 | -7.25  | 0.00033 | 0.01856 | -7.54  |
| 129.0697 | 11.8 | Naphthalene; Azulene                                                                                                                                                                                                                                                                                                                                                                                                                                                                                                                                                                                                                                                                                                                                                                                                                                                                                                                                                                                                                                                                                                                                       | 0.00000 | 0.00000 | -5.06 | 0.00048 | 0.02205 | -5.39  | 0.00051 | 0.01525 | -4.68  | 0.00001 | 0.00096 | -19.16 |
| 803.6986 | 11.5 | SM(41:0)                                                                                                                                                                                                                                                                                                                                                                                                                                                                                                                                                                                                                                                                                                                                                                                                                                                                                                                                                                                                                                                                                                                                                   | 0.00001 | 0.00019 | -5.01 | 0.00311 | 0.06407 | -6.41  | 0.00019 | 0.00819 | -9.80  | 0.59551 | 1.00000 | -1.90  |
| 290.1601 | 0.6  | 3-Methylglutaryl carnitine;O-Adipoyl carnitine;4-Amino-6,7-dimethoxy-2-(1-piperazinyl)quinazoline;2,4-Pyrimidinediamine, 5-((4-(aminomethyl)-3,5-dimethoxyphenyl)methyl)-;Etazolate;2-(1-Piperazinyl)-4-amino-6,7-dimethoxyquinazoline                                                                                                                                                                                                                                                                                                                                                                                                                                                                                                                                                                                                                                                                                                                                                                                                                                                                                                                     | 0.00029 | 0.00262 | -4.86 | 0.01287 | 0.16115 | -4.82  | 0.14950 | 0.74287 | -4.18  | 0.05766 | 0.46248 | -8.94  |
| 147.1174 | 11.8 | (3-Methyl-2-butenyl)-benzene;3-Methylidenebicyclo[4.2.2]deca-7,9-diene;Octahydro-1H-2,4,1-(ethane[1,1,2]triyil)cyclobuta[cd]pentalene;1-(But-3-en-1-yl)-3-methylbenzene;2-Ethylindan;Triethyl borate;Dispiro(2.0.2.5)undeca-1,5-diene;2-Octanone, 1-fluoro-;1,2-Dimethyl-alpha-methylstyrene;1,2-Dimethyl-4-(1-methylethenyl)-benzene;5-Phenyl-1-pentene;(1-Isopropylvinyl)benzene;Octanoyl fluoride                                                                                                                                                                                                                                                                                                                                                                                                                                                                                                                                                                                                                                                                                                                                                       | 0.00000 | 0.00000 | -4.86 | 0.00073 | 0.02702 | -4.54  | 0.00185 | 0.03675 | -3.32  | 0.00000 | 0.00053 | -13.87 |
| 621.5446 | 11.2 | LDG(36:2);1,2-Dioleoyl-sn-glycerol;1,2-Dioleoyl-rac-glycerol                                                                                                                                                                                                                                                                                                                                                                                                                                                                                                                                                                                                                                                                                                                                                                                                                                                                                                                                                                                                                                                                                               | 0.00000 | 0.00000 | -4.86 | 0.05792 | 0.46433 | -2.41  | 0.00000 | 0.00035 | -16.15 | 0.00280 | 0.07970 | -5.50  |
| 653.5407 | 8.5  | 7226-96-2                                                                                                                                                                                                                                                                                                                                                                                                                                                                                                                                                                                                                                                                                                                                                                                                                                                                                                                                                                                                                                                                                                                                                  | 0.00004 | 0.00054 | -4.82 | 0.03628 | 0.34415 | -6.25  | 0.02278 | 0.21170 | -3.20  | 0.01284 | 0.20195 | -2.37  |
| 689.5903 | 11.1 |                                                                                                                                                                                                                                                                                                                                                                                                                                                                                                                                                                                                                                                                                                                                                                                                                                                                                                                                                                                                                                                                                                                                                            | 0.00000 | 0.00004 | -4.67 | 0.01902 | 0.21110 | -3.47  | 0.00027 | 0.01057 | -6.56  | 0.00936 | 0.17291 | -4.54  |
| 770.5653 | 8.5  | PC(35:3);PE(38:3)                                                                                                                                                                                                                                                                                                                                                                                                                                                                                                                                                                                                                                                                                                                                                                                                                                                                                                                                                                                                                                                                                                                                          | 0.00048 | 0.00405 | -4.66 | 0.05860 | 0.46433 | -4.26  | 0.04050 | 0.32599 | -4.58  | 0.11005 | 0.68363 | -2.68  |
| 118.0870 | 0.6  | Betaine;L-Valine; 2-Amino-3-methylbutanoic acid; D-Valine;Vaporole;N-Methyl-a-aminoisobutyric acid;5-Aminopentanoic acid;Norvaline; 2S-amino-pentanoic acid;Amyl Nitrite;4R-aminopentanoic acid; 4S-aminopentanoic acid; 4-amino-pentanoic acid;2-Amino-2-methylbutanoate;4-Methylaminobutyrate;isoamyl nitrite;Valine;Pentanoic acid, 4-amino-, (R)-; Valeric acid, 4-amino-, (R)-(+); (R)-(+)-4-Aminovaleric acid; (R)-4-Aminopentanoic acid;Pentanoic acid, 4-amino-, (S)-; (S)-4-Aminopentanoic acid; (S)-4-Aminovaleric acid;Pentanoic acid, 4-amino-, (1)-; Valeric acid, 4-amino-, (1)-; (1)-4-Aminopentanoic acid; (RS)-4-Aminopentanoic acid; (RS)-4-Methyl-gamma-aminobutyric acid;L-Norvaline;3-Nitropentane;2-Ethoxypropanamide;Pentyl nitrite;3-Methylbutyl nitrite;N-Ethyl-N-methylglycine;4-Methylmorpholine 4-oxide;N-(3-methoxypropyl)formamide;1,3-Dioxolane-2-methanamine, N-methyl-;1,3-Dioxolane-2-ethylamine;Butane, 2-methyl-2-nitro-;Ethyl 3-aminopropanoate;Formamide, N-(2-hydroxy-1,1-dimethylethyl)-;3-Methyl-1-nitrobutane;1-Nitropentane;Carbamic acid, 2-methylpropyl ester;Carbamic acid, butyl ester;Ethyl ethylcarbamate | 0.00004 | 0.00054 | -4.64 | 0.19077 | 1.00000 | -2.22  | 0.00534 | 0.07401 | -4.91  | 0.00753 | 0.15508 | -2.73  |
| 339.2895 | 6.9  | Glycidyl oleate; 4-(4,8-Dimethylnonyl)-2,6-dimethyl-1-phenylpyridin-1-ium                                                                                                                                                                                                                                                                                                                                                                                                                                                                                                                                                                                                                                                                                                                                                                                                                                                                                                                                                                                                                                                                                  | 0.00000 | 0.00001 | -4.63 | 0.00447 | 0.07883 | -3.79  | 0.00765 | 0.09504 | -3.82  | 0.00002 | 0.00247 | -11.03 |
| 837.5467 | 8.5  | PI(34:1)                                                                                                                                                                                                                                                                                                                                                                                                                                                                                                                                                                                                                                                                                                                                                                                                                                                                                                                                                                                                                                                                                                                                                   | 0.00015 | 0.00147 | -4.56 | 0.05919 | 0.46497 | -11.87 | 0.18064 | 0.84104 | -3.24  | 0.00327 | 0.08744 | -3.19  |
| 651.5344 | 8.5  | 1-(8-[3]-ladderane-octanoyl)-2-(8-[3]-ladderane-octanyl)-sn-glycerol                                                                                                                                                                                                                                                                                                                                                                                                                                                                                                                                                                                                                                                                                                                                                                                                                                                                                                                                                                                                                                                                                       | 0.00010 | 0.00105 | -4.56 | 0.06045 | 0.46688 | -10.10 | 0.11870 | 0.63105 | -3.30  | 0.00329 | 0.08744 | -3.32  |



S2 Table (continue)

L  
C  
-  
P  
O  
S  
-  
M  
S

|          |      |                                                                                                                                                                                                                                                                                                                                                                                                                                                                                                                                                                                                                                                                                                                                                                                                                                                                                                                                                                                                                                                                                                                                                                                                                                                                                                                                                                                                                                                                                                                                                                                                                                                                                                                                                                |         |         |       |         |         |       |         |         |       |         |         |       |
|----------|------|----------------------------------------------------------------------------------------------------------------------------------------------------------------------------------------------------------------------------------------------------------------------------------------------------------------------------------------------------------------------------------------------------------------------------------------------------------------------------------------------------------------------------------------------------------------------------------------------------------------------------------------------------------------------------------------------------------------------------------------------------------------------------------------------------------------------------------------------------------------------------------------------------------------------------------------------------------------------------------------------------------------------------------------------------------------------------------------------------------------------------------------------------------------------------------------------------------------------------------------------------------------------------------------------------------------------------------------------------------------------------------------------------------------------------------------------------------------------------------------------------------------------------------------------------------------------------------------------------------------------------------------------------------------------------------------------------------------------------------------------------------------|---------|---------|-------|---------|---------|-------|---------|---------|-------|---------|---------|-------|
| 429.3728 | 6.1  | Cholesteryl acetate;4alpha-Formyl-4beta-methyl-5alpha-cholesta-8-en-3beta-ol; 4i±-formyl-4i²-methyl-5i±-cholesta-8-en-3i²-ol;4alpha-Hydroxymethyl-4beta-methyl-5alpha-cholesta-8,24-dien-3beta-ol; 4i±-hydroxymethyl-4i²-methyl-5i±-cholesta-8,24-dien-3i²-ol;3-Hydroxystigmast-5-en-7-one; 3beta-hydroxy-stigmast-5-en-7-one;Mangiferdesmethylursanone;(6beta,24R)-6-Hydroxystigmast-4-en-3-one;Stigmastane-3,6-dione;(3alpha,5alpha,7alpha)-14-Methylergosta-9(11),24(28)-dien-3,7-diol;3-beta-Hydroxy-4-beta-methyl-5-alpha-cholest-7-ene-4-alpha-carbaldehyde; 3beta-hydroxy-4beta-methyl-5alpha-cholest-7-ene-4alpha-;carbaldehyde; 3beta-Hydroxy-4beta-methyl-5alpha-cholest-7-ene-4alpha-carbaldehyde;(3beta,24R,24'R)-fucosterol epoxide; (3beta,24S,24'S)-fucosterol epoxide;Saringosterol ;22S-hydroxyisofucosterol;halosterol A;halosterol B;leucisterol;(25R)-5alpha,6alpha-epoxy-24R,26R-dimethyl-26,27-cyclo-cholestan-3beta-ol;1alpha-hydroxy-26,27-dimethylvitamin D3 / 1alpha-hydroxy-26,27-dimethylcholecalciferol;25-hydroxy-26,27-dimethylvitamin D3 / 25-hydroxy-26,27-dimethylcholecalciferol;(6S)-6,19-ethano-25-hydroxy-6,19-dihydrovitamin D3 / (6S)-6,19-ethano-25-hydroxy-6,19-dihydrocholecalciferol; (6R)-6,19-ethano-25-hydroxy-6,19-dihydrovitamin D3 / (6R)-6,19-ethano-25-hydroxy-6,19-dihydrocholecalciferol;25-Hydroxy-6,19-dihydro-6,19-ethanovitamin D3;1-Hydroxyvitamin D5;4a-Hydroxymethyl-4b-methyl-5a-cholesta-8,24-dien-3b-ol;1i±-hydroxy-26,27-dimethylvitamin D3 / 1i±-hydroxy-26,27-dimethylcholecalciferol;4alpha-formyl-4beta-methyl-5alpha-cholesta-8-en-3beta-ol;4alpha-hydroxymethyl-4beta-methyl-5alpha-cholesta-8,24-dien-3beta-ol;3-beta-hydroxy-4-beta-methyl-5-alpha-cholest-7-ene-4-alpha-carbaldehyde | 0.00125 | 0.00917 | -4.55 | 0.23805 | 1.00000 | -4.12 | 0.01197 | 0.13281 | -4.05 | 0.27337 | 1.00000 | -3.78 |
| 896.5381 | 8.3  | Chlorophyll d                                                                                                                                                                                                                                                                                                                                                                                                                                                                                                                                                                                                                                                                                                                                                                                                                                                                                                                                                                                                                                                                                                                                                                                                                                                                                                                                                                                                                                                                                                                                                                                                                                                                                                                                                  | 0.00003 | 0.00044 | -4.34 | 0.01715 | 0.19506 | -5.23 | 0.03379 | 0.29042 | -3.65 | 0.01291 | 0.20195 | -2.05 |
| 855.7429 | 12.5 | TG(104:8);TG(52:4);Glycerol 1,3-di-(9Z,12Z-octadecadienoate) 2-hexadecanoate;                                                                                                                                                                                                                                                                                                                                                                                                                                                                                                                                                                                                                                                                                                                                                                                                                                                                                                                                                                                                                                                                                                                                                                                                                                                                                                                                                                                                                                                                                                                                                                                                                                                                                  | 0.00000 | 0.00000 | -4.32 | 0.00014 | 0.01172 | -4.14 | 0.00001 | 0.00212 | -6.38 | 0.08598 | 0.57977 | -1.75 |
| 780.5537 | 7.7  | PC(36:5);PE(39:5)                                                                                                                                                                                                                                                                                                                                                                                                                                                                                                                                                                                                                                                                                                                                                                                                                                                                                                                                                                                                                                                                                                                                                                                                                                                                                                                                                                                                                                                                                                                                                                                                                                                                                                                                              | 0.00003 | 0.00046 | -4.21 | 0.02976 | 0.29822 | -3.18 | 0.02322 | 0.21491 | -6.09 | 0.01071 | 0.18264 | -3.75 |
| 751.5096 | 7.9  | 1,26-Hexacosanediol diferulate; 1,28-Dicaffeoyloctacosanediol                                                                                                                                                                                                                                                                                                                                                                                                                                                                                                                                                                                                                                                                                                                                                                                                                                                                                                                                                                                                                                                                                                                                                                                                                                                                                                                                                                                                                                                                                                                                                                                                                                                                                                  | 0.00000 | 0.00004 | -4.21 | 0.00065 | 0.02469 | -7.18 | 0.00951 | 0.11035 | -5.34 | 0.00934 | 0.17291 | -3.57 |
| 298.0655 | 0.6  | Asn-Gly-OH;Gly-Asn-OH;Benzoic acid, 2-((3-chloro-1-naphthalenyl)amino)-;Glybuzole;1-Amino-1-oxobutan-2-yl 3,5-dinitrobenzoate;1-Amino-2-methyl-1-oxopropan-2-yl 3,5-dinitrobenzoate;1,4-Naphthalenedione, 2-chloro-3-((4-methylphenyl)amino)-;2-Naphthalenecarboxamide, N-(4-chlorophenyl)-3-hydroxy-;2-Chloro-5-(4-methylnaphthalen-1-yl)pyridine-4-carboxylic acid;N-(5-Isopropyl-1,3,4-thiadiazol-2-yl)-p-toluenesulphonamide;2-Naphthalenecarboxamide, N-(2-chlorophenyl)-1-hydroxy-                                                                                                                                                                                                                                                                                                                                                                                                                                                                                                                                                                                                                                                                                                                                                                                                                                                                                                                                                                                                                                                                                                                                                                                                                                                                       | 0.00001 | 0.00020 | -4.20 | 0.05293 | 0.43521 | -3.55 | 0.08753 | 0.52794 | -1.47 | 0.00013 | 0.01036 | -3.99 |
| 881.7185 | 12.3 | 22:2-Glc-Campesterol                                                                                                                                                                                                                                                                                                                                                                                                                                                                                                                                                                                                                                                                                                                                                                                                                                                                                                                                                                                                                                                                                                                                                                                                                                                                                                                                                                                                                                                                                                                                                                                                                                                                                                                                           | 0.00001 | 0.00018 | -4.20 | 0.35461 | 1.00000 | -1.78 | 0.00015 | 0.00712 | -8.34 | 0.01089 | 0.18446 | -6.88 |
| 647.5606 | 11.4 | LDG(38:3)                                                                                                                                                                                                                                                                                                                                                                                                                                                                                                                                                                                                                                                                                                                                                                                                                                                                                                                                                                                                                                                                                                                                                                                                                                                                                                                                                                                                                                                                                                                                                                                                                                                                                                                                                      | 0.00007 | 0.00080 | -4.17 | 0.04303 | 0.38067 | -2.78 | 0.02386 | 0.21821 | -4.32 | 0.01838 | 0.24819 | -4.77 |
| 140.0689 | 0.6  | (3S)-3-(Trifluoromethyl)pyrrolidine; SBB013287                                                                                                                                                                                                                                                                                                                                                                                                                                                                                                                                                                                                                                                                                                                                                                                                                                                                                                                                                                                                                                                                                                                                                                                                                                                                                                                                                                                                                                                                                                                                                                                                                                                                                                                 | 0.00005 | 0.00058 | -4.11 | 0.16002 | 0.91352 | -3.00 | 0.00270 | 0.04506 | -5.91 | 0.02345 | 0.28303 | -4.51 |
| 806.5697 | 8.3  | Lactosylceramide (d18:1/12:0); LacCer(d18:1/12:0);PC(76:12);PC(38:6);PE(41:6);LacCer(d14:1/16:0);Galabiosylceramide (d18:1/12:0)                                                                                                                                                                                                                                                                                                                                                                                                                                                                                                                                                                                                                                                                                                                                                                                                                                                                                                                                                                                                                                                                                                                                                                                                                                                                                                                                                                                                                                                                                                                                                                                                                               | 0.00000 | 0.00006 | -4.08 | 0.00529 | 0.08645 | -7.41 | 0.00351 | 0.05353 | -5.65 | 0.00886 | 0.16733 | -2.27 |
| 341.3057 | 11.1 | Polyoxyethylene (600) monoricinoleate; 2-oxo-heneicosanoic acid; Glycidyl stearate                                                                                                                                                                                                                                                                                                                                                                                                                                                                                                                                                                                                                                                                                                                                                                                                                                                                                                                                                                                                                                                                                                                                                                                                                                                                                                                                                                                                                                                                                                                                                                                                                                                                             | 0.00000 | 0.00002 | -4.05 | 0.00291 | 0.06273 | -2.32 | 0.00338 | 0.05288 | -4.84 | 0.00170 | 0.05868 | -4.74 |
| 848.6816 | 12.3 | PS(O-41:0)                                                                                                                                                                                                                                                                                                                                                                                                                                                                                                                                                                                                                                                                                                                                                                                                                                                                                                                                                                                                                                                                                                                                                                                                                                                                                                                                                                                                                                                                                                                                                                                                                                                                                                                                                     | 0.00006 | 0.00073 | -4.05 | 0.00026 | 0.01588 | -8.37 | 0.00856 | 0.10243 | -5.99 | 0.87353 | 1.00000 | -1.29 |
| 899.7096 | 12.3 | TG(56:10); TG(112:20)                                                                                                                                                                                                                                                                                                                                                                                                                                                                                                                                                                                                                                                                                                                                                                                                                                                                                                                                                                                                                                                                                                                                                                                                                                                                                                                                                                                                                                                                                                                                                                                                                                                                                                                                          | 0.00012 | 0.00121 | -4.04 | 0.00092 | 0.03092 | -5.26 | 0.00837 | 0.10074 | -5.28 | 0.82324 | 1.00000 | -1.68 |
| 653.5106 | 10.8 | LDG(38:7);LDG(40:7);LDG(39:7)                                                                                                                                                                                                                                                                                                                                                                                                                                                                                                                                                                                                                                                                                                                                                                                                                                                                                                                                                                                                                                                                                                                                                                                                                                                                                                                                                                                                                                                                                                                                                                                                                                                                                                                                  | 0.00000 | 0.00003 | -4.01 | 0.00063 | 0.02445 | -4.60 | 0.00306 | 0.04919 | -4.93 | 0.02024 | 0.25683 | -4.17 |
| 645.5454 | 11.1 | LDG(38:4);LDG(36:4);LDG(40:4);1-(9Z,12Z,15Z-octadecatrienoyl)-2-(11Z-eicosenoyl)-sn-glycerol                                                                                                                                                                                                                                                                                                                                                                                                                                                                                                                                                                                                                                                                                                                                                                                                                                                                                                                                                                                                                                                                                                                                                                                                                                                                                                                                                                                                                                                                                                                                                                                                                                                                   | 0.00000 | 0.00001 | -4.01 | 0.00207 | 0.05078 | -1.97 | 0.00217 | 0.04058 | -3.92 | 0.00102 | 0.04594 | -4.39 |
| 125.0005 | 0.6  | Phosphonoacetaldehyde                                                                                                                                                                                                                                                                                                                                                                                                                                                                                                                                                                                                                                                                                                                                                                                                                                                                                                                                                                                                                                                                                                                                                                                                                                                                                                                                                                                                                                                                                                                                                                                                                                                                                                                                          | 0.00002 | 0.00029 | -3.94 | 0.09361 | 0.62941 | -2.33 | 0.01240 | 0.13558 | -3.16 | 0.00160 | 0.05711 | -3.99 |
| 296.0665 | 0.6  | 5-Aminoimidazole ribonucleotide;2,2,2-trifluoro-N-(8-fluoro-9H-fluoren-2-yl)acetamide;5,8-Quinolinedione, 6-amino-2-(2-nitrophenyl)-;N-(5-Bromopentyl)-3-phenylprop-2-enamide                                                                                                                                                                                                                                                                                                                                                                                                                                                                                                                                                                                                                                                                                                                                                                                                                                                                                                                                                                                                                                                                                                                                                                                                                                                                                                                                                                                                                                                                                                                                                                                  | 0.00004 | 0.00054 | -3.84 | 0.15773 | 0.90598 | -2.70 | 0.03543 | 0.30001 | -2.61 | 0.00106 | 0.04663 | -4.94 |
| 764.5228 | 8.6  | PE(38:6);PC(35:6);PE(P-38:6)                                                                                                                                                                                                                                                                                                                                                                                                                                                                                                                                                                                                                                                                                                                                                                                                                                                                                                                                                                                                                                                                                                                                                                                                                                                                                                                                                                                                                                                                                                                                                                                                                                                                                                                                   | 0.00004 | 0.00047 | -3.84 | 0.00859 | 0.11904 | -5.84 | 0.08045 | 0.50112 | -5.45 | 0.00968 | 0.17291 | -2.75 |
| 897.5409 | 8.3  | PI(39:6)                                                                                                                                                                                                                                                                                                                                                                                                                                                                                                                                                                                                                                                                                                                                                                                                                                                                                                                                                                                                                                                                                                                                                                                                                                                                                                                                                                                                                                                                                                                                                                                                                                                                                                                                                       | 0.00000 | 0.00007 | -3.73 | 0.00183 | 0.04595 | -8.56 | 0.01912 | 0.18917 | -3.68 | 0.00577 | 0.12872 | -2.40 |

S2 Table (continue)

L  
C  
-  
P  
O  
S  
-  
M  
S

|          |      |                                                                                                                                                                                                                                                                                                                                                                                                                                                                                                                                                                                                                                                                                                                                                                                                                                                                                                                                                                                                                                                                                                                                                                                                                                                                                                                                                                                                                                                                                                                                                                                                                                                                                                                                                                                                                                                                            |         |         |       |         |         |       |         |         |       |         |         |       |
|----------|------|----------------------------------------------------------------------------------------------------------------------------------------------------------------------------------------------------------------------------------------------------------------------------------------------------------------------------------------------------------------------------------------------------------------------------------------------------------------------------------------------------------------------------------------------------------------------------------------------------------------------------------------------------------------------------------------------------------------------------------------------------------------------------------------------------------------------------------------------------------------------------------------------------------------------------------------------------------------------------------------------------------------------------------------------------------------------------------------------------------------------------------------------------------------------------------------------------------------------------------------------------------------------------------------------------------------------------------------------------------------------------------------------------------------------------------------------------------------------------------------------------------------------------------------------------------------------------------------------------------------------------------------------------------------------------------------------------------------------------------------------------------------------------------------------------------------------------------------------------------------------------|---------|---------|-------|---------|---------|-------|---------|---------|-------|---------|---------|-------|
| 258.1100 | 0.7  | Glycerophosphocholine;5-Methylcytidine;Tolmetin;Pyro-L-glutaminy-L-glutamine;Isimine;Benserazide;sn-glycero-3-Phosphocholine;N4-Methylcytidine;NSC359093;6-Chloro-N <sup>4</sup> ~-[2-(morpholin-4-yl)ethyl]pyrimidine-4,5-diamine;4-Methoxy-N-(2-methoxyphenyl)benzamide;2-phenoxyethyl N-phenylcarbamate;2-(4-aminophenyl)-2-(4-methoxyphenyl)acetic acid;2-[[4-(Trifluoromethyl)phenyl]methyl]piperidin-4-one;3'-O-Methylcytidine N-(4'-Hydroxy-3'-methoxy[1,1'-biphenyl]-3-yl)acetamide;4'-Hydroxy-3'-methoxy-N-methyl[1,1'-biphenyl]-3-carboxamide;N1-(Tris(hydroxymethyl)methyl-4-nitro-1,2-phenylenediamine;5-(2,5-Dimethylphenyl)-2-methoxypyridine-3-carboxylic acid;6-(4-Ethoxy-2-methylphenyl)pyridine-3-carboxylic acid;5-Amino-2'-methoxy-5'-methyl[1,1'-biphenyl]-3-carboxylic acid;5-Amino-3'-ethoxy[1,1'-biphenyl]-3-carboxylic acid;Uridine, 2'-deoxy-, 4-(O-methylxime);4-(4-Ethoxy-2-methylphenyl)pyridine-3-carboxylic acid;Dinoseb, ammonium salt;STK047859;Acetamide, N-[2-(2-methoxyphenoxy)phenyl]-;Pyridazine, 3,6-dipropoxy-4-nitro-, 1-oxide;Benzamide, 2-hydroxy-N-(4-methoxyphenyl)-4-methyl-                                                                                                                                                                                                                                                                                                                                                                                                                                                                                                                                                                                                                                                                                                                                                 | 0.00001 | 0.00011 | -3.73 | 0.02022 | 0.22227 | -3.65 | 0.00233 | 0.04207 | -5.66 | 0.00957 | 0.17291 | -3.59 |
| 836.5438 | 8.5  | PS(40:6)                                                                                                                                                                                                                                                                                                                                                                                                                                                                                                                                                                                                                                                                                                                                                                                                                                                                                                                                                                                                                                                                                                                                                                                                                                                                                                                                                                                                                                                                                                                                                                                                                                                                                                                                                                                                                                                                   | 0.00015 | 0.00149 | -3.70 | 0.06689 | 0.50297 | -8.90 | 0.22295 | 0.95878 | -2.72 | 0.00210 | 0.06860 | -2.79 |
| 792.5547 | 9.7  | PC(37:6); PE(40:6); PE(P-40:6)                                                                                                                                                                                                                                                                                                                                                                                                                                                                                                                                                                                                                                                                                                                                                                                                                                                                                                                                                                                                                                                                                                                                                                                                                                                                                                                                                                                                                                                                                                                                                                                                                                                                                                                                                                                                                                             | 0.00002 | 0.00031 | -3.69 | 0.00327 | 0.06606 | -7.64 | 0.10571 | 0.59230 | -2.81 | 0.00836 | 0.16580 | -2.35 |
| 257.1476 | 0.6  | Pulcherrimic acid; 6-(4,4,5,5-Tetramethyl-1,3,2-dioxaborolan-2-yl)quinazoline; NSC520792; 4,7,10,13-Tetraoxahexadecanedinitrile                                                                                                                                                                                                                                                                                                                                                                                                                                                                                                                                                                                                                                                                                                                                                                                                                                                                                                                                                                                                                                                                                                                                                                                                                                                                                                                                                                                                                                                                                                                                                                                                                                                                                                                                            | 0.00036 | 0.00314 | -3.66 | 0.52528 | 1.00000 | -1.87 | 0.00165 | 0.03392 | -6.28 | 0.09524 | 0.62030 | -3.85 |
| 568.3397 | 0.9  | LPC(22:6); Penitrem D                                                                                                                                                                                                                                                                                                                                                                                                                                                                                                                                                                                                                                                                                                                                                                                                                                                                                                                                                                                                                                                                                                                                                                                                                                                                                                                                                                                                                                                                                                                                                                                                                                                                                                                                                                                                                                                      | 0.00039 | 0.00331 | -3.64 | 0.08808 | 0.60831 | -3.97 | 0.08183 | 0.50522 | -2.94 | 0.02990 | 0.31938 | -2.88 |
| 781.6119 | 12.3 | 3-Demethylubiquinone-9                                                                                                                                                                                                                                                                                                                                                                                                                                                                                                                                                                                                                                                                                                                                                                                                                                                                                                                                                                                                                                                                                                                                                                                                                                                                                                                                                                                                                                                                                                                                                                                                                                                                                                                                                                                                                                                     | 0.00017 | 0.00169 | -3.63 | 0.16214 | 0.91746 | -2.67 | 0.00123 | 0.02752 | -6.67 | 0.21269 | 0.96984 | -3.17 |
| 86.0971  | 0.6  | Piperidine;(R)-2-Methylpyrrolidine;N-Methylpyrrolidine;cyclobutylmethanamine                                                                                                                                                                                                                                                                                                                                                                                                                                                                                                                                                                                                                                                                                                                                                                                                                                                                                                                                                                                                                                                                                                                                                                                                                                                                                                                                                                                                                                                                                                                                                                                                                                                                                                                                                                                               | 0.00004 | 0.00052 | -3.57 | 0.13056 | 0.80883 | -2.50 | 0.03656 | 0.30616 | -3.19 | 0.00108 | 0.04667 | -4.77 |
| 655.4689 | 10.5 | PA(O-34:4); PA(P-34:3)                                                                                                                                                                                                                                                                                                                                                                                                                                                                                                                                                                                                                                                                                                                                                                                                                                                                                                                                                                                                                                                                                                                                                                                                                                                                                                                                                                                                                                                                                                                                                                                                                                                                                                                                                                                                                                                     | 0.00001 | 0.00011 | -3.55 | 0.01278 | 0.16115 | -3.60 | 0.00124 | 0.02752 | -4.05 | 0.03048 | 0.31960 | -3.52 |
| 197.0815 | 12.3 | Homoveratric acid;Xanthoxylin;2,4,5-Trimethoxybenzaldehyde;(+)3-(3,4-Methylenedioxyphenyl)-1,2-propanediol;Maltlyl isobutyrate;(S)-Batatic acid;1-(2,4,5-Trihydroxyphenyl)-1-butanone;2-Hydroxy-3-(4-methoxyphenyl)propanoic acid;(S)-2-(4-Methoxyphenoxy)propanoic acid;4-Hydroxy-6-methyl-3-(1-oxobutyl)-2H-pyran-2-one;5-Hydroxyconiferyl alcohol;3-(3-Hydroxyphenyl)-2-methylactic acid;3-(3,4-Dihydroxyphenyl)-2-methylpropionic acid;Hydroferulic acid;2,3-Dihydroxy-p-cumate;Phlorisobutyrophenone;Acetosyringone;2',6'-Dimethoxy-4'-hydroxyacetophenone;Cantharidin;Paeonilactone B;α-Methyl-3,4-dihydroxyphenylpropionic acid;3-(4-Hydroxy-3-methoxyphenyl)propionic acid;ASARYLALDEHYDE;ORSELLINIC ACID, ETHYL ESTER;ACETOSYRINGONE;XANTHOXYLIN;CANTHARIDIN;SAFROLGLYCOL;5-Hydroxy-4-pentenoic acid d-lactone;(7E)-2-acetyl-2,3,4,5-tetrahydrooxonine-6,9-dione;Atracic acid;3-(3-Methoxyphenoxy)propionic acid;2,4-Dimethoxy-5-methylbenzoic acid;[3-(Propylsulfanyl)phenyl]boronic acid;NSC361563;Ethyl 4-(furan-2-yl)-3-oxobutanoate;4-(2-Hydroperoxypropan-2-yl)benzoic acid;4-Ethoxyphenoxyacetic acid;4,5-Diethoxycyclohexa-3,5-diene-1,2-dione;4-Hydroxy-1-oxaspiro[5.5]undec-4-ene-2,3-dione;4-Ethoxy-2-methoxybenzoic acid;2',4',5'-Trihydroxybutyrophenone;2-methoxyethyl 2-hydroxybenzoate;4-[1,3]dioxolan-2-yl-2-methoxyphenol;Dimethyl Octa-2,4,6-trienedioate;3-Methoxy-4-(methoxymethoxy)benzaldehyde;2,3,6-Trimethoxybenzaldehyde;2,4-Dimethoxyphenylacetic acid;Methyl 2,4-dihydroxy-3,6-dimethylbenzoate;(2-Ethoxy-phenoxy)-acetic acid;2-(3-Methoxyphenoxy)propanoic acid;2-[4-(hydroxymethyl)phenoxy]propanoic acid;2-pyrazinylbenzimidazole;Diprop-2-en-1-yl (2Z)-but-2-enedioate;4-methoxy-2-(methoxymethoxy)benzaldehyde;1,2,4-Triazol[4,3-a]pyridine, 3-(2-pyridinyl)-;Maltol isobutyrate;2,5-Cyclohexadiene-1-acetic acid, 1-hydroxy-4- | 0.00056 | 0.00455 | -3.48 | 0.53395 | 1.00000 | -1.82 | 0.00094 | 0.02255 | -6.58 | 0.24023 | 1.00000 | -3.65 |
| 773.6520 | 10.7 | SM(39:1)                                                                                                                                                                                                                                                                                                                                                                                                                                                                                                                                                                                                                                                                                                                                                                                                                                                                                                                                                                                                                                                                                                                                                                                                                                                                                                                                                                                                                                                                                                                                                                                                                                                                                                                                                                                                                                                                   | 0.00203 | 0.01385 | -3.44 | 0.19636 | 1.00000 | -1.97 | 0.07423 | 0.47802 | -3.50 | 0.12201 | 0.72447 | -1.94 |
| 569.3432 | 0.9  | (24E)-3α,15α-Diacetoxy-23-oxo-7,9(11),24-lanostatrien-26-oic acid;(-)-Helvolic acid;Karatavigenin B;6,8a-Seco-6,8a-deoxy-5-oxoavermectin "1a" aglycone                                                                                                                                                                                                                                                                                                                                                                                                                                                                                                                                                                                                                                                                                                                                                                                                                                                                                                                                                                                                                                                                                                                                                                                                                                                                                                                                                                                                                                                                                                                                                                                                                                                                                                                     | 0.00022 | 0.00208 | -3.41 | 0.02891 | 0.29118 | -3.91 | 0.03845 | 0.31503 | -3.48 | 0.08798 | 0.58638 | -1.96 |
| 358.2953 | 0.8  | N-palmitoyl threonine                                                                                                                                                                                                                                                                                                                                                                                                                                                                                                                                                                                                                                                                                                                                                                                                                                                                                                                                                                                                                                                                                                                                                                                                                                                                                                                                                                                                                                                                                                                                                                                                                                                                                                                                                                                                                                                      | 0.00063 | 0.00510 | -3.41 | 0.00609 | 0.09667 | -3.01 | 0.10744 | 0.59327 | -2.91 | 0.34297 | 1.00000 | -1.47 |
| 845.5280 | 8.3  | PG(42:9)                                                                                                                                                                                                                                                                                                                                                                                                                                                                                                                                                                                                                                                                                                                                                                                                                                                                                                                                                                                                                                                                                                                                                                                                                                                                                                                                                                                                                                                                                                                                                                                                                                                                                                                                                                                                                                                                   | 0.00002 | 0.00026 | -3.31 | 0.01377 | 0.16745 | -5.24 | 0.06302 | 0.43261 | -3.41 | 0.00230 | 0.07129 | -2.59 |
| 797.5087 | 9.4  | PA(44:10)                                                                                                                                                                                                                                                                                                                                                                                                                                                                                                                                                                                                                                                                                                                                                                                                                                                                                                                                                                                                                                                                                                                                                                                                                                                                                                                                                                                                                                                                                                                                                                                                                                                                                                                                                                                                                                                                  | 0.00000 | 0.00006 | -3.31 | 0.00141 | 0.03706 | -5.32 | 0.00437 | 0.06319 | -2.72 | 0.02515 | 0.28458 | -2.53 |
| 540.4985 | 7.6  | Hexacosanoyl carnitine                                                                                                                                                                                                                                                                                                                                                                                                                                                                                                                                                                                                                                                                                                                                                                                                                                                                                                                                                                                                                                                                                                                                                                                                                                                                                                                                                                                                                                                                                                                                                                                                                                                                                                                                                                                                                                                     | 0.00000 | 0.00003 | -3.20 | 0.69829 | 1.00000 | -1.71 | 0.00240 | 0.04255 | -3.28 | 0.00000 | 0.00049 | -5.72 |

S2 Table (continue)

L  
C  
-  
P  
O  
S  
-  
M  
S

|          |      |                                                                                                                                                                                                                                                                                                                                                                                                                                                                                                                                                                                                                                                                                                                                                                                                                                                                                                                                                                                                                                                                                                                                                                                                                                             |         |         |       |         |         |       |         |         |        |         |         |       |
|----------|------|---------------------------------------------------------------------------------------------------------------------------------------------------------------------------------------------------------------------------------------------------------------------------------------------------------------------------------------------------------------------------------------------------------------------------------------------------------------------------------------------------------------------------------------------------------------------------------------------------------------------------------------------------------------------------------------------------------------------------------------------------------------------------------------------------------------------------------------------------------------------------------------------------------------------------------------------------------------------------------------------------------------------------------------------------------------------------------------------------------------------------------------------------------------------------------------------------------------------------------------------|---------|---------|-------|---------|---------|-------|---------|---------|--------|---------|---------|-------|
| 258.1108 | 0.6  | Glycerophosphocholine;5-Methylcytidine;Tolmetin;Pyro-L-glutaminy-L-glutamine;Isimine;Benserazide;sn-glycero-3-Phosphocholine;N4-Methylcytidine;NSC359093;6-Chloro-N <sup>4</sup> ~-[2-(morpholin-4-yl)ethyl]pyrimidine-4,5-diamine;4-Methoxy-N-(2-methoxyphenyl)benzamide;2-phenoxyethyl N-phenylcarbamate;2-(4-aminophenyl)-2-(4-methoxyphenyl)acetic acid;2-[[4-(Trifluoromethyl)phenyl]methyl]piperidin-4-one;3'-O-Methylcytidine;N-(4'-Hydroxy-3'-methoxy[1,1'-biphenyl]-3-yl)acetamide;4'-Hydroxy-3'-methoxy-N-methyl[1,1'-biphenyl]-3-carboxamide;N1-(Tris(hydroxymethyl)methyl-4-nitro-1,2-phenylenediamine;5-(2,3-Dimethylphenyl)-2-methoxypyridine-3-carboxylic acid;5-(4-Ethylphenyl)-2-methoxypyridine-3-carboxylic acid;5-(2,4-Dimethylphenyl)-2-methoxypyridine-3-carboxylic acid;2-(4-Ethoxy-2-methylphenyl)pyridine-4-carboxylic acid;5-Amino-2'-methoxy-5'-methyl[1,1'-biphenyl]-3-carboxylic acid;5-Amino-3'-ethoxy[1,1'-biphenyl]-3-carboxylic acid;Uridine, 2'-deoxy-, 4-(O-methylxime);4-(4-Ethoxy-2-methylphenyl)pyridine-3-carboxylic acid;Dinoseb, ammonium salt;STK047859;Acetamide, N-[2-(2-methoxyphenoxy)phenyl]-;Pyridazine, 3,6-dipropoxy-4-nitro-, 1-oxide;Benzamide, 2-hydroxy-N-(4-methoxyphenyl)-4-methyl- | 0.00001 | 0.00023 | -3.20 | 0.13056 | 0.80883 | -2.14 | 0.00584 | 0.07874 | -2.43  | 0.00126 | 0.05144 | -2.79 |
| 744.5535 | 8.1  | PC(33:2); 1,2-Dioleoyl phosphatidyl ethanolamine                                                                                                                                                                                                                                                                                                                                                                                                                                                                                                                                                                                                                                                                                                                                                                                                                                                                                                                                                                                                                                                                                                                                                                                            | 0.00000 | 0.00003 | -3.20 | 0.03791 | 0.35307 | -3.94 | 0.00014 | 0.00712 | -6.89  | 0.00425 | 0.10449 | -2.48 |
| 635.5440 | 10.4 | 1-(8-[5]-ladderane-octanyl)-2-(8-[3]-ladderane-octanyl)-sn-glycerol                                                                                                                                                                                                                                                                                                                                                                                                                                                                                                                                                                                                                                                                                                                                                                                                                                                                                                                                                                                                                                                                                                                                                                         | 0.00494 | 0.02935 | -3.19 | 0.10325 | 0.68215 | -2.79 | 0.18314 | 0.84578 | -3.99  | 0.24860 | 1.00000 | -2.37 |
| 795.6462 | 12.3 | TG(96:12); TG(48:6)                                                                                                                                                                                                                                                                                                                                                                                                                                                                                                                                                                                                                                                                                                                                                                                                                                                                                                                                                                                                                                                                                                                                                                                                                         | 0.00635 | 0.03675 | -3.17 | 0.03586 | 0.34295 | -2.06 | 0.13763 | 0.70228 | -2.74  | 0.72339 | 1.00000 | -1.94 |
| 313.2740 | 10.6 | 10-oxo-nonadecanoic acid;Ricinoleic Acid methyl ester;Methyl ricinoleate;Glycidyl Palmitate                                                                                                                                                                                                                                                                                                                                                                                                                                                                                                                                                                                                                                                                                                                                                                                                                                                                                                                                                                                                                                                                                                                                                 | 0.00000 | 0.00004 | -3.17 | 0.05069 | 0.42443 | -2.51 | 0.00011 | 0.00699 | -12.36 | 0.06291 | 0.48257 | -2.72 |
| 169.1017 | 11.8 | 2,4,6,8-Tridecatetrayne;4-Methylbiphenyl;(E,E)-1,3,5,11-Tridecatetraene-7,9-diyne;Diphenylmethane;4-Phenyltoluene;4-Fluoro-1-methoxy-2-(propan-2-yl)benzene                                                                                                                                                                                                                                                                                                                                                                                                                                                                                                                                                                                                                                                                                                                                                                                                                                                                                                                                                                                                                                                                                 | 0.00000 | 0.00000 | -3.17 | 0.00078 | 0.02840 | -5.10 | 0.01615 | 0.16706 | -2.30  | 0.00016 | 0.01090 | -9.83 |
| 575.5035 | 10.6 | LDG(34:2); cis-Uvariamicin IB; Reticulatin 2; cis-Uvariamicin IV; Neoreticulatacin A; LDG(33:2); LDG(35:2)                                                                                                                                                                                                                                                                                                                                                                                                                                                                                                                                                                                                                                                                                                                                                                                                                                                                                                                                                                                                                                                                                                                                  | 0.00002 | 0.00026 | -3.13 | 0.05176 | 0.42875 | -3.09 | 0.00043 | 0.01318 | -11.17 | 0.08437 | 0.57310 | -2.41 |
| 827.6992 | 11.2 | SM(43:2)                                                                                                                                                                                                                                                                                                                                                                                                                                                                                                                                                                                                                                                                                                                                                                                                                                                                                                                                                                                                                                                                                                                                                                                                                                    | 0.00206 | 0.01400 | -3.12 | 0.06176 | 0.47378 | -4.46 | 0.07603 | 0.48701 | -2.39  | 0.34192 | 1.00000 | -2.90 |
| 796.5842 | 9.1  | PC(37:4); PE(40:4)                                                                                                                                                                                                                                                                                                                                                                                                                                                                                                                                                                                                                                                                                                                                                                                                                                                                                                                                                                                                                                                                                                                                                                                                                          | 0.00003 | 0.00046 | -3.11 | 0.18359 | 1.00000 | -1.35 | 0.00309 | 0.04941 | -4.14  | 0.01002 | 0.17478 | -3.66 |
| 795.6889 | 11.7 | 1-N-[(4-tert-butylcyclohexyl)-[(4-tert-butylcyclohexyl)-[(4-(dihydroxyamino)-2,6-di(propan-2-yl)cyclohexyl)amino]methyl]peroxymethyl]-4-N,4-N-dihydroxy-2,6-di(propan-2-yl)cyclohexane-1,4-diamine                                                                                                                                                                                                                                                                                                                                                                                                                                                                                                                                                                                                                                                                                                                                                                                                                                                                                                                                                                                                                                          | 0.00083 | 0.00648 | -3.08 | 0.01034 | 0.13660 | -2.65 | 0.98780 | 1.00000 | -1.69  | 0.00226 | 0.07129 | -4.11 |
| 755.6031 | 9.8  | SM(38:2);SM(38:3)                                                                                                                                                                                                                                                                                                                                                                                                                                                                                                                                                                                                                                                                                                                                                                                                                                                                                                                                                                                                                                                                                                                                                                                                                           | 0.00148 | 0.01051 | -3.05 | 0.42183 | 1.00000 | -2.45 | 0.08199 | 0.50522 | -6.05  | 0.02578 | 0.28749 | -2.63 |
| 339.2897 | 8.3  | Glycidyl oleate, 4-(4,8-Dimethylnonyl)-2,6-dimethyl-1-phenylpyridin-1-ium                                                                                                                                                                                                                                                                                                                                                                                                                                                                                                                                                                                                                                                                                                                                                                                                                                                                                                                                                                                                                                                                                                                                                                   | 0.00089 | 0.00685 | -3.02 | 0.21332 | 1.00000 | -2.22 | 0.67540 | 1.00000 | -2.72  | 0.00057 | 0.02950 | -8.65 |
| 337.2740 | 10.6 | Pregnanetriol; 5beta-Pregnane-3alpha,17alpha,20alpha-triol, 3-Methyl-5-pentyl-2-furanundecanoic acid; Isolinderanolide; 2alpha-(Hydroxymethyl)-17-methyl-5alpha-androstane-3beta,17beta-diol; 2,2'-(1R,2R)-Cyclohexane-1,2-diyl]bis(4,4,5,5-tetramethyl-1,3,2-dioxaborolane)                                                                                                                                                                                                                                                                                                                                                                                                                                                                                                                                                                                                                                                                                                                                                                                                                                                                                                                                                                | 0.00000 | 0.00002 | -3.02 | 0.03815 | 0.35307 | -3.11 | 0.00005 | 0.00480 | -12.97 | 0.06084 | 0.47466 | -2.81 |
| 810.5274 | 7.8  | PS(38:5); PE(0:0)                                                                                                                                                                                                                                                                                                                                                                                                                                                                                                                                                                                                                                                                                                                                                                                                                                                                                                                                                                                                                                                                                                                                                                                                                           | 0.00083 | 0.00648 | -3.02 | 0.13556 | 0.82779 | -2.31 | 0.17075 | 0.81288 | -1.67  | 0.01965 | 0.25155 | -2.47 |
| 297.0697 | 0.6  | N-Methoxyspirobrassinol methyl ether; NSC153740; 2-Chloro-4-(4-methylnaphthalen-1-yl)benzoic acid                                                                                                                                                                                                                                                                                                                                                                                                                                                                                                                                                                                                                                                                                                                                                                                                                                                                                                                                                                                                                                                                                                                                           | 0.00108 | 0.00802 | -3.01 | 0.51601 | 1.00000 | -2.30 | 0.09088 | 0.53861 | -2.66  | 0.00852 | 0.16580 | -3.20 |
| 730.5376 | 9.6  | PC(32:2); PC(64:4); PE(35:2)                                                                                                                                                                                                                                                                                                                                                                                                                                                                                                                                                                                                                                                                                                                                                                                                                                                                                                                                                                                                                                                                                                                                                                                                                | 0.00040 | 0.00338 | -3.00 | 0.28214 | 1.00000 | -2.74 | 0.03518 | 0.29897 | -3.41  | 0.01698 | 0.23812 | -2.18 |
| 184.0742 | 0.6  | 4-Nitrosobiphenyl;Phosphocholine;3-Dibenzofuranamine;4-Hydroxycarbazole;4-Benzoylpyridine;2-Aminodiphenylene oxide;6-Methoxy-2-naphthonitrile;5-(Furan-3-yl)-1H-indole;1-Hydroxycarbazole;4-Dibenzofuranamine;Methanone, phenyl-2-pyridinyl;-2-Propenal, 3-(2-quinolinyl)-                                                                                                                                                                                                                                                                                                                                                                                                                                                                                                                                                                                                                                                                                                                                                                                                                                                                                                                                                                  | 0.00001 | 0.00022 | -2.99 | 0.12150 | 0.76938 | -2.22 | 0.00611 | 0.07977 | -2.33  | 0.00145 | 0.05506 | -3.45 |
| 778.5352 | 7.9  | PC(36:6); PC(72:12); PE(39:6)                                                                                                                                                                                                                                                                                                                                                                                                                                                                                                                                                                                                                                                                                                                                                                                                                                                                                                                                                                                                                                                                                                                                                                                                               | 0.00003 | 0.00045 | -2.98 | 0.30094 | 1.00000 | -2.11 | 0.00080 | 0.02070 | -10.08 | 0.01450 | 0.21668 | -2.04 |
| 827.7112 | 12.4 | TG(100:8); TG(50:4)                                                                                                                                                                                                                                                                                                                                                                                                                                                                                                                                                                                                                                                                                                                                                                                                                                                                                                                                                                                                                                                                                                                                                                                                                         | 0.00001 | 0.00023 | -2.94 | 0.00097 | 0.03226 | -5.96 | 0.00415 | 0.06040 | -4.33  | 0.26259 | 1.00000 | -1.54 |
| 795.6279 | 12.1 | Coenzyme Q9                                                                                                                                                                                                                                                                                                                                                                                                                                                                                                                                                                                                                                                                                                                                                                                                                                                                                                                                                                                                                                                                                                                                                                                                                                 | 0.00009 | 0.00094 | -2.92 | 0.09738 | 0.65094 | -3.23 | 0.00129 | 0.02801 | -4.57  | 0.30426 | 1.00000 | -1.92 |
| 778.5351 | 8.1  | PC(36:6); PC(72:12); PE(39:6)                                                                                                                                                                                                                                                                                                                                                                                                                                                                                                                                                                                                                                                                                                                                                                                                                                                                                                                                                                                                                                                                                                                                                                                                               | 0.02046 | 0.09973 | -2.88 | 0.29308 | 1.00000 | -2.32 | 0.44210 | 1.00000 | -5.36  | 0.23595 | 1.00000 | -3.83 |
| 104.1077 | 0.6  | Neurine;Choline;2-Amino-3-methyl-1-butanol;[(2-Methylpropyl)amino]methanol;Dimepranol;(S)-(+)-1-Dimethylamino-2-propanol;1-Butanamine, N-hydroxy-3-methyl-;2-methyl-2-(methylamino)propan-1-ol;2-(Isopropylamino)ethanol                                                                                                                                                                                                                                                                                                                                                                                                                                                                                                                                                                                                                                                                                                                                                                                                                                                                                                                                                                                                                    | 0.00001 | 0.00017 | -2.86 | 0.06805 | 0.50669 | -2.20 | 0.00873 | 0.10344 | -2.32  | 0.00115 | 0.04884 | -3.27 |
| 817.7140 | 11.7 | SM(42:0)                                                                                                                                                                                                                                                                                                                                                                                                                                                                                                                                                                                                                                                                                                                                                                                                                                                                                                                                                                                                                                                                                                                                                                                                                                    | 0.00028 | 0.00261 | -2.85 | 0.00753 | 0.11012 | -5.19 | 0.00440 | 0.06332 | -5.21  | 0.83166 | 1.00000 | -1.22 |
| 863.6913 | 12.4 | Coenzyme Q10; Ubisemiquinone; Ubidecarenone                                                                                                                                                                                                                                                                                                                                                                                                                                                                                                                                                                                                                                                                                                                                                                                                                                                                                                                                                                                                                                                                                                                                                                                                 | 0.00015 | 0.00153 | -2.82 | 0.53056 | 1.00000 | -1.64 | 0.00267 | 0.04506 | -4.28  | 0.01850 | 0.24819 | -2.92 |
| 679.4691 | 10.2 | PA(P-36:5)                                                                                                                                                                                                                                                                                                                                                                                                                                                                                                                                                                                                                                                                                                                                                                                                                                                                                                                                                                                                                                                                                                                                                                                                                                  | 0.00264 | 0.01731 | -2.79 | 0.21267 | 1.00000 | -3.25 | 0.00723 | 0.09180 | -5.37  | 0.67750 | 1.00000 | -1.92 |
| 617.5137 | 12.1 | LDG(36:4)                                                                                                                                                                                                                                                                                                                                                                                                                                                                                                                                                                                                                                                                                                                                                                                                                                                                                                                                                                                                                                                                                                                                                                                                                                   | 0.00002 | 0.00025 | -2.76 | 0.00986 | 0.13211 | -2.50 | 0.00727 | 0.09180 | -4.52  | 0.03528 | 0.33886 | -3.04 |

S2 Table (continue)

L  
C  
-  
P  
O  
S  
-  
M  
S

|          |      |                                                                                                                                                                                                                                                                                                                                                                                                                                                                                                                                                                                                                                                                                                                                                                                                                                                          |         |         |       |         |         |       |         |         |       |         |         |        |
|----------|------|----------------------------------------------------------------------------------------------------------------------------------------------------------------------------------------------------------------------------------------------------------------------------------------------------------------------------------------------------------------------------------------------------------------------------------------------------------------------------------------------------------------------------------------------------------------------------------------------------------------------------------------------------------------------------------------------------------------------------------------------------------------------------------------------------------------------------------------------------------|---------|---------|-------|---------|---------|-------|---------|---------|-------|---------|---------|--------|
| 835.6816 | 11.7 | TG(51:7);TG(102:14);PG(O-41:0)                                                                                                                                                                                                                                                                                                                                                                                                                                                                                                                                                                                                                                                                                                                                                                                                                           | 0.00287 | 0.01841 | -2.74 | 0.01157 | 0.14948 | -2.48 | 0.99999 | 1.00000 | -1.24 | 0.00725 | 0.15383 | -3.38  |
| 811.5302 | 7.8  | PI(32:0); PC(0:0)                                                                                                                                                                                                                                                                                                                                                                                                                                                                                                                                                                                                                                                                                                                                                                                                                                        | 0.00142 | 0.01019 | -2.73 | 0.11172 | 0.72554 | -1.72 | 0.43906 | 1.00000 | -1.00 | 0.01155 | 0.18972 | -4.15  |
| 733.6212 | 9.8  | SM(36:0)                                                                                                                                                                                                                                                                                                                                                                                                                                                                                                                                                                                                                                                                                                                                                                                                                                                 | 0.00125 | 0.00917 | -2.72 | 0.19814 | 1.00000 | -1.91 | 0.07059 | 0.46371 | -3.08 | 0.07182 | 0.51791 | -2.13  |
| 589.5187 | 9.6  | Mayolene-20                                                                                                                                                                                                                                                                                                                                                                                                                                                                                                                                                                                                                                                                                                                                                                                                                                              | 0.00034 | 0.00301 | -2.70 | 0.40768 | 1.00000 | -2.06 | 0.02019 | 0.19559 | -2.76 | 0.01282 | 0.20195 | -2.70  |
| 816.7070 | 12.3 | SM(42:1); TG(96:8); TG(48:4)                                                                                                                                                                                                                                                                                                                                                                                                                                                                                                                                                                                                                                                                                                                                                                                                                             | 0.00034 | 0.00302 | -2.67 | 0.00851 | 0.11904 | -5.75 | 0.00787 | 0.09676 | -6.99 | 0.76251 | 1.00000 | -1.38  |
| 801.6843 | 11.3 | SM(41:1)                                                                                                                                                                                                                                                                                                                                                                                                                                                                                                                                                                                                                                                                                                                                                                                                                                                 | 0.00023 | 0.00218 | -2.64 | 0.02705 | 0.27859 | -2.13 | 0.01975 | 0.19462 | -3.69 | 0.18509 | 0.91530 | -1.91  |
| 770.5687 | 8.3  | PC(35:3); PE(38:3)                                                                                                                                                                                                                                                                                                                                                                                                                                                                                                                                                                                                                                                                                                                                                                                                                                       | 0.00427 | 0.02567 | -2.61 | 0.67026 | 1.00000 | -2.23 | 0.07130 | 0.46705 | -2.29 | 0.05372 | 0.44274 | -1.95  |
| 659.5006 | 11.2 | PA(O-34:2); PA(P-34:1)                                                                                                                                                                                                                                                                                                                                                                                                                                                                                                                                                                                                                                                                                                                                                                                                                                   | 0.00000 | 0.00000 | -2.58 | 0.01398 | 0.16903 | -1.74 | 0.00001 | 0.00165 | -4.81 | 0.03200 | 0.32513 | -2.92  |
| 617.5142 | 10.4 | LDG(36:4)                                                                                                                                                                                                                                                                                                                                                                                                                                                                                                                                                                                                                                                                                                                                                                                                                                                | 0.00485 | 0.02893 | -2.55 | 0.07234 | 0.52502 | -2.70 | 0.10707 | 0.59327 | -2.60 | 0.47298 | 1.00000 | -1.97  |
| 337.2744 | 0.9  | Pregnanetriol; 5beta-Pregnane-3alpha,17alpha,20alpha-triol;3-Methyl-5-pentyl-2-furanundecanoic acid;isolinderanolide;2alpha-(Hydroxymethyl)-17-methyl-5alpha-androstane-3beta,17beta-diol;2,2'-[1(R,2R)-Cyclohexane-1,2-diy]bis(4,4,5,5-tetramethyl-1,3,2-dioxaborolane)                                                                                                                                                                                                                                                                                                                                                                                                                                                                                                                                                                                 | 0.00030 | 0.00270 | -2.55 | 0.13141 | 0.81127 | -2.70 | 0.64365 | 1.00000 | -1.10 | 0.00022 | 0.01338 | -3.92  |
| 156.0430 | 0.6  | N-Methylethanolaminium phosphate; D-1-Aminopropan-2-ol O-phosphate; L-1-Aminopropan-2-ol O-phosphate; N-Methylethanolamine phosphate; (2S,3S)-3-Amino-2-hydroxybutanoic acid--hydrogen chloride (1/1); 1-(Methoxycarbonyl)cyclobut-2-ene-1-carboxylate; 1-Oxo-1H-indene-2-carbonitrile; 3-(hydroxyamino)propylphosphonic acid; Potassium N,N-dimethyl-beta-alaninate                                                                                                                                                                                                                                                                                                                                                                                                                                                                                     | 0.00003 | 0.00041 | -2.54 | 0.51672 | 1.00000 | -1.41 | 0.00256 | 0.04359 | -3.54 | 0.00145 | 0.05506 | -4.33  |
| 901.7251 | 12.5 | TG(112:18); TG(56:9)                                                                                                                                                                                                                                                                                                                                                                                                                                                                                                                                                                                                                                                                                                                                                                                                                                     | 0.00004 | 0.00053 | -2.52 | 0.00753 | 0.11012 | -3.81 | 0.00093 | 0.02255 | -3.80 | 0.55178 | 1.00000 | -1.61  |
| 339.2898 | 8.2  | Glycidyl oleate; 4-(4,8-Dimethylnonyl)-2,6-dimethyl-1-phenylpyridin-1-ium                                                                                                                                                                                                                                                                                                                                                                                                                                                                                                                                                                                                                                                                                                                                                                                | 0.00803 | 0.04466 | -2.47 | 0.50746 | 1.00000 | -1.87 | 0.98014 | 1.00000 | -1.78 | 0.00068 | 0.03285 | -10.82 |
| 918.7016 | 12.4 | PC(46:6)                                                                                                                                                                                                                                                                                                                                                                                                                                                                                                                                                                                                                                                                                                                                                                                                                                                 | 0.00004 | 0.00052 | -2.40 | 0.00056 | 0.02343 | -4.90 | 0.00202 | 0.03929 | -3.32 | 0.87251 | 1.00000 | -1.14  |
| 756.5537 | 7.6  | PC(34:3); PE(37:3)                                                                                                                                                                                                                                                                                                                                                                                                                                                                                                                                                                                                                                                                                                                                                                                                                                       | 0.00036 | 0.00315 | -2.39 | 0.26540 | 1.00000 | -1.87 | 0.04182 | 0.33543 | -3.91 | 0.01299 | 0.20195 | -2.05  |
| 794.5689 | 9.2  | PC(37:5); PE(40:5)                                                                                                                                                                                                                                                                                                                                                                                                                                                                                                                                                                                                                                                                                                                                                                                                                                       | 0.00004 | 0.00053 | -2.38 | 0.49936 | 1.00000 | -1.64 | 0.00398 | 0.05829 | -3.30 | 0.00206 | 0.06832 | -3.38  |
| 226.1205 | 0.6  | Nnal-N-oxide;alpha-[3-[(Hydroxymethyl)nitrosoamino]propyl]-3-pyridinemethanol;2-[2-(4-Pyridinyl)-1-butenyl]phenol;Navenone A;1-(Methylnitrosoamino)-4-(3-pyridinyl)-1,4-butanediol;4-(Methylnitrosamino)-1-(3-pyridyl-N-oxide)-1-butanol;NSC400085;2,3-diphenylpropanamide;3,3-diphenylpropanamide;Propionanilide, o-phenyl;-N-(2,5-Dimethylphenyl)benzamide;Hexazinone (Metab D);Benzamide, 2-methyl-N-(3-methylphenyl)-;Benzamide, 2-ethyl-N-phenyl;-N'-[[3-hydroxy-5-(hydroxymethyl)-2-methylpyridin-4-yl]methyl]acetohydrazide;N-methyl-alpha-phenylbenzeneacetamide;Oletimol;AC1L9QXK;4-[1-(4-Methoxyphenyl)prop-1-en-2-yl]pyridine;4-{2-[4-(Methylamino)phenyl]ethenyl}phenol;1-[3-(Aminomethyl)phenyl]-2-phenylethan-1-one;1-Phenyl-5,6,7,8-tetrahydroquinolin-2(1H)-one;Methanone, [4-(dimethylamino)phenyl]phenyl;-o-Acetotoluidide, 4'-phenyl- | 0.00001 | 0.00010 | -2.36 | 0.02189 | 0.23490 | -1.83 | 0.00195 | 0.03834 | -2.41 | 0.00747 | 0.15508 | -1.75  |
| 832.5781 | 8.7  | PC(40:7)                                                                                                                                                                                                                                                                                                                                                                                                                                                                                                                                                                                                                                                                                                                                                                                                                                                 | 0.00002 | 0.00036 | -2.33 | 0.00262 | 0.05755 | -3.68 | 0.02753 | 0.24486 | -2.11 | 0.05124 | 0.43824 | -2.44  |
| 782.5697 | 8.1  | PC(36:4);PC(72:8);PE(39:4)                                                                                                                                                                                                                                                                                                                                                                                                                                                                                                                                                                                                                                                                                                                                                                                                                               | 0.00268 | 0.01748 | -2.31 | 0.36809 | 1.00000 | -1.97 | 0.10272 | 0.58555 | -2.46 | 0.05155 | 0.43824 | -2.27  |
| 794.5696 | 10.0 | PC(37:5); PE(40:5)                                                                                                                                                                                                                                                                                                                                                                                                                                                                                                                                                                                                                                                                                                                                                                                                                                       | 0.00003 | 0.00042 | -2.29 | 0.04609 | 0.40065 | -1.99 | 0.05489 | 0.39335 | -2.65 | 0.00153 | 0.05556 | -1.71  |
| 624.6282 | 11.8 | Cer(d18:0/22:0);Cer(d20:0/20:0)                                                                                                                                                                                                                                                                                                                                                                                                                                                                                                                                                                                                                                                                                                                                                                                                                          | 0.00070 | 0.00559 | -2.29 | 0.09182 | 0.62249 | -3.01 | 0.01026 | 0.11847 | -2.37 | 0.37401 | 1.00000 | -1.78  |
| 650.6437 | 12.0 | N-Lignoceroylsphingosine; Cer(d18:1/24:0)                                                                                                                                                                                                                                                                                                                                                                                                                                                                                                                                                                                                                                                                                                                                                                                                                | 0.00002 | 0.00026 | -2.29 | 0.00129 | 0.03594 | -3.07 | 0.01679 | 0.17212 | -2.75 | 0.07967 | 0.55357 | -1.93  |
| 781.6186 | 10.3 | SM(40:3)                                                                                                                                                                                                                                                                                                                                                                                                                                                                                                                                                                                                                                                                                                                                                                                                                                                 | 0.00049 | 0.00410 | -2.27 | 0.04145 | 0.37309 | -2.35 | 0.05310 | 0.38615 | -2.17 | 0.12855 | 0.74209 | -2.68  |
| 683.5640 | 8.7  | LDG(40:6); LDG(42:6); LDG(41:6)                                                                                                                                                                                                                                                                                                                                                                                                                                                                                                                                                                                                                                                                                                                                                                                                                          | 0.00826 | 0.04531 | -2.26 | 0.41364 | 1.00000 | -2.64 | 0.74682 | 1.00000 | -1.72 | 0.00729 | 0.15383 | -4.17  |
| 667.5922 | 11.1 | Glycerol 1,2-didodecanoate 3-tetradecanoate; TG(12:0/12:0/14:0)[iso3]; TG(76:0); Glyceryl 2-acetate distearate                                                                                                                                                                                                                                                                                                                                                                                                                                                                                                                                                                                                                                                                                                                                           | 0.00000 | 0.00003 | -2.26 | 0.00050 | 0.02234 | -2.42 | 0.06726 | 0.45627 | -1.68 | 0.00061 | 0.03051 | -2.96  |
| 530.4034 | 0.6  | Rocuronium                                                                                                                                                                                                                                                                                                                                                                                                                                                                                                                                                                                                                                                                                                                                                                                                                                               | 0.00143 | 0.01026 | -2.26 | 0.97265 | 1.00000 | -1.49 | 0.02801 | 0.24819 | -2.80 | 0.00531 | 0.12272 | -6.61  |
| 593.5130 | 10.6 | LDG(34:2); cis-Uvariamicin IB; Reticulatain 2; cis-Uvariamicin IV; Neoreticulatain A; LDG(33:2); LDG(35:2)                                                                                                                                                                                                                                                                                                                                                                                                                                                                                                                                                                                                                                                                                                                                               | 0.00004 | 0.00051 | -2.25 | 0.05870 | 0.46433 | -2.91 | 0.00293 | 0.04819 | -4.58 | 0.05616 | 0.45368 | -2.42  |
| 415.1926 | 1.2  | Octadecanoic acid trichloroethyl ester; SU 11652; AGN-PC-OLONAA; Acridine, 9,9'-ethylenediiminobis-                                                                                                                                                                                                                                                                                                                                                                                                                                                                                                                                                                                                                                                                                                                                                      | 0.01002 | 0.05328 | -2.23 | 0.00988 | 0.13211 | -3.06 | 0.36552 | 1.00000 | -2.43 | 0.83758 | 1.00000 | -1.82  |
| 806.5695 | 7.7  | Lactosylceramide (d18:1/12:0);PC(38:6);PE(41:6); LacCer(d14:1/16:0);                                                                                                                                                                                                                                                                                                                                                                                                                                                                                                                                                                                                                                                                                                                                                                                     | 0.00304 | 0.01931 | -2.19 | 0.99414 | 1.00000 | -1.06 | 0.01119 | 0.12543 | -3.25 | 0.03121 | 0.32280 | -4.13  |
| 531.4062 | 0.6  | alpha-Tocopherol succinate, VITAMIN E SUCCINATE(TOCOPHEROL SUCCINATE); d-alpha-Tocopheryll succinate; NSC375717                                                                                                                                                                                                                                                                                                                                                                                                                                                                                                                                                                                                                                                                                                                                          | 0.00363 | 0.02252 | -2.17 | 0.94415 | 1.00000 | -1.68 | 0.09129 | 0.53861 | -3.19 | 0.00778 | 0.15879 | -5.60  |
| 496.3398 | 8.8  | LPC(32:0);PC(O-16:0);LPC(16:0);LPE(19:0);Cytosine, 1-beta-D-arabinofuranosyl-N(sup 4)-margaroyl-                                                                                                                                                                                                                                                                                                                                                                                                                                                                                                                                                                                                                                                                                                                                                         | 0.00067 | 0.00530 | -2.13 | 0.14583 | 0.86099 | -1.43 | 0.01737 | 0.17488 | -2.51 | 0.15721 | 0.83788 | -2.02  |
| 603.5350 | 8.8  | 1-(14-methyl-pentadecanoyl)-2-(8-[3]-ladderane-octanyl)-sn-glycerol, 1-Hexadecyl-2-arachidonoyl-glycerol                                                                                                                                                                                                                                                                                                                                                                                                                                                                                                                                                                                                                                                                                                                                                 | 0.00003 | 0.00038 | -2.09 | 0.15741 | 0.90598 | -1.86 | 0.00039 | 0.01295 | -4.33 | 0.05157 | 0.43824 | -1.49  |

S2 Table (continue)

L  
C  
-  
P  
O  
S  
-  
M  
S

|          |      |                                                                                                                                                                                                                                                                                                                                                                          |         |         |       |         |         |       |         |         |       |         |         |       |
|----------|------|--------------------------------------------------------------------------------------------------------------------------------------------------------------------------------------------------------------------------------------------------------------------------------------------------------------------------------------------------------------------------|---------|---------|-------|---------|---------|-------|---------|---------|-------|---------|---------|-------|
| 499.1159 | 0.7  | N,N'-Bis(gamma-glutamyl)cystine; Bis-gamma-glutamylcystine; Bis- $\beta$ -glutamylcystine; Triphenylead acetate; 2-Bromo-6beta-fluoro-11alpha,17,21-trihydroxypregna-1,4-diene-3,20-dione 21-acetate                                                                                                                                                                     | 0.00000 | 0.00009 | -2.09 | 0.11332 | 0.73178 | -1.25 | 0.04268 | 0.33850 | -1.64 | 0.00003 | 0.00388 | -2.35 |
| 526.2941 | 1.0  | LPE(22:6)                                                                                                                                                                                                                                                                                                                                                                | 0.00530 | 0.03114 | -2.09 | 0.00216 | 0.05245 | -3.05 | 0.62602 | 1.00000 | -2.13 | 0.65574 | 1.00000 | -1.40 |
| 280.0928 | 0.6  | Thieno(3,2-c)pyridine, 4,5,6,7-tetrahydro-5-(2-phenylethyl)-, monohydrochloride; 1,3,4-Oxadiazole-2-methanol, 5-(3,4-dimethoxyphenyl)-, carbamate (ester)                                                                                                                                                                                                                | 0.00007 | 0.00074 | -2.07 | 0.04743 | 0.40758 | -2.50 | 0.03621 | 0.30432 | -1.47 | 0.00874 | 0.16691 | -2.14 |
| 839.7478 | 12.6 | TG(52:5)                                                                                                                                                                                                                                                                                                                                                                 | 0.00000 | 0.00000 | -2.07 | 0.00014 | 0.01172 | -2.70 | 0.00006 | 0.00481 | -2.92 | 0.07169 | 0.51791 | -1.58 |
| 769.4984 | 7.8  | PG(36:5)                                                                                                                                                                                                                                                                                                                                                                 | 0.00018 | 0.00180 | -2.06 | 0.29567 | 1.00000 | -1.93 | 0.00806 | 0.09851 | -2.40 | 0.02368 | 0.28303 | -2.12 |
| 645.4859 | 12.4 | PA(O-33:2); PA(P-33:1)                                                                                                                                                                                                                                                                                                                                                   | 0.00126 | 0.00923 | -2.06 | 0.51392 | 1.00000 | -1.61 | 0.00046 | 0.01413 | -3.42 | 0.74373 | 1.00000 | -1.68 |
| 660.5039 | 11.2 | Acidissiminin                                                                                                                                                                                                                                                                                                                                                            | 0.00000 | 0.00009 | -2.06 | 0.12951 | 0.80673 | -1.80 | 0.00053 | 0.01525 | -3.55 | 0.01820 | 0.24765 | -2.64 |
| 535.3781 | 12.3 | Pyrohyferforin; Piloplex; Decanoic acid, 2-(4-(1-oxododecyl)-1-piperazinylolethyl ester, monomethanesulfonate                                                                                                                                                                                                                                                            | 0.00023 | 0.00215 | -2.05 | 0.40000 | 1.00000 | -1.77 | 0.00038 | 0.01295 | -4.61 | 0.35671 | 1.00000 | -1.92 |
| 98.9846  | 0.6  | Phosphoric acid                                                                                                                                                                                                                                                                                                                                                          | 0.00173 | 0.01195 | -2.04 | 0.63352 | 1.00000 | -1.62 | 0.17969 | 0.83830 | -2.22 | 0.00404 | 0.10264 | -2.51 |
| 859.5290 | 8.5  | PI(36:4)                                                                                                                                                                                                                                                                                                                                                                 | 0.00371 | 0.02280 | -2.04 | 0.44871 | 1.00000 | -1.31 | 0.09355 | 0.54778 | -3.11 | 0.07541 | 0.53438 | -1.65 |
| 184.0741 | 11.6 | 4-Nitrosobiphenyl; Phosphocholine; 3-Dibenzofuranamine; 4-Hydroxycarbazole; 4-Benzoylpyridine; 2-Aminodiphenylene oxide; 6-Methoxy-2-naphthonitrile; 5-(Furan-3-yl)-1H-indole; 1-Hydroxycarbazole; Methanone, phenyl-2-pyridinyl; 2-Propenal, 3-(2-quinolinyl)-                                                                                                          | 0.00245 | 0.01618 | -2.04 | 0.00851 | 0.11904 | -2.06 | 0.17104 | 0.81288 | -2.41 | 0.62536 | 1.00000 | -1.73 |
| 885.5456 | 8.7  | PI(38:5)                                                                                                                                                                                                                                                                                                                                                                 | 0.00153 | 0.01077 | -2.04 | 0.13976 | 0.83811 | -2.22 | 0.01231 | 0.13535 | -3.92 | 0.47115 | 1.00000 | -1.42 |
| 834.6005 | 9.5  | PC(40:6); PE(43:6); LacCer(d18:1/14:0)                                                                                                                                                                                                                                                                                                                                   | 0.00008 | 0.00085 | -2.03 | 0.00619 | 0.09690 | -3.90 | 0.12439 | 0.65070 | -1.83 | 0.02366 | 0.28303 | -1.61 |
| 761.6425 | 10.3 | PA(O-41:0)                                                                                                                                                                                                                                                                                                                                                               | 0.01069 | 0.05669 | -2.03 | 0.27340 | 1.00000 | -1.55 | 0.23000 | 0.97729 | -2.46 | 0.20723 | 0.96171 | -2.99 |
| 889.7275 | 12.5 | TG(55:8); TG(110:16); Sodium L-throxine pentahydrate                                                                                                                                                                                                                                                                                                                     | 0.00002 | 0.00029 | -2.03 | 0.00053 | 0.02265 | -3.89 | 0.11775 | 0.62745 | -2.10 | 0.03047 | 0.31960 | -1.49 |
| 182.0592 | 12.3 | L-2-Amino-4-(hydroxymethylphosphinyl)butanoate; Glufosinate;Phosphinothricin;(Morpholin-4-yl)acetic acid--hydrogen chloride (1/1);2-chloro-N,N-bis(2-hydroxyethyl)acetamide;9H-Indeno(2,1-b)pyridin-9-one;Methyl aminolevulinate hydrochloride;Methyl (3R)-3-hydroxy-L-prolinate--hydrogen chloride (1/1);4-Hydroxypiperidine-4-carboxylic acid--hydrogen chloride (1/1) | 0.00050 | 0.00416 | -2.03 | 0.13981 | 0.83811 | -1.88 | 0.00055 | 0.01526 | -2.83 | 0.77712 | 1.00000 | -1.62 |
| 561.4875 | 12.5 | TG(102:8); TG(51:4)                                                                                                                                                                                                                                                                                                                                                      | 0.00001 | 0.00012 | -2.02 | 0.00007 | 0.00684 | -2.73 | 0.01753 | 0.17579 | -2.10 | 0.22477 | 0.98154 | -1.48 |
| 782.5694 | 7.9  | PC(36:4); PC(72:8); PE(39:4)                                                                                                                                                                                                                                                                                                                                             | 0.00000 | 0.00004 | -2.02 | 0.03006 | 0.29876 | -1.73 | 0.00008 | 0.00590 | -2.96 | 0.01941 | 0.25155 | -1.25 |
| 857.7583 | 12.6 | TG(104:6); TG(52:3); 1-Palmitoyl-2-oleoyl-3-linoleoyl-rac-glycerol                                                                                                                                                                                                                                                                                                       | 0.00000 | 0.00002 | -2.00 | 0.00120 | 0.03529 | -2.63 | 0.00013 | 0.00712 | -3.83 | 0.12099 | 0.72447 | -1.51 |
| 616.6017 | 11.5 | Bromopentakis(bromomethyl)benzene; Cer(m18:1(4E)/24:1(15Z))                                                                                                                                                                                                                                                                                                              | 0.00053 | 0.00431 | -2.00 | 0.57458 | 1.00000 | -1.45 | 0.00480 | 0.06858 | -6.93 | 0.09661 | 0.62745 | -1.71 |
| 879.7415 | 12.4 | TG(108:12); TG(54:6); Trilinolein C18:2                                                                                                                                                                                                                                                                                                                                  | 0.00049 | 0.00408 | -1.93 | 0.04115 | 0.37180 | -3.50 | 0.00550 | 0.07527 | -7.54 | 0.59062 | 1.00000 | -1.37 |
| 716.5228 | 9.1  | PE(34:2); PC(31:2); 1-Palmitoyl-2-linoleoyl PE                                                                                                                                                                                                                                                                                                                           | 0.00760 | 0.04309 | -1.93 | 0.42745 | 1.00000 | -2.13 | 0.24799 | 1.00000 | -2.21 | 0.06329 | 0.48368 | -1.87 |
| 772.5851 | 9.2  | PC(35:2); PE(38:2)                                                                                                                                                                                                                                                                                                                                                       | 0.00618 | 0.03587 | -1.92 | 0.95105 | 1.00000 | -1.23 | 0.05812 | 0.40508 | -3.51 | 0.02961 | 0.31938 | -2.03 |
| 631.5818 | 11.5 | Solanisol                                                                                                                                                                                                                                                                                                                                                                | 0.00032 | 0.00289 | -1.92 | 0.18612 | 1.00000 | -1.70 | 0.02004 | 0.19559 | -2.18 | 0.03390 | 0.33203 | -1.47 |
| 339.2895 | 10.6 | Glycidyl oleate, 4-(4,8-Dimethylnonyl)-2,6-dimethyl-1-phenylpyridin-1-ium                                                                                                                                                                                                                                                                                                | 0.00372 | 0.02281 | -1.91 | 0.37551 | 1.00000 | -1.85 | 0.05656 | 0.40033 | -3.68 | 0.15606 | 0.83546 | -2.41 |
| 575.5036 | 9.1  | Montecristin; Mayolene-19; Ethylenebis(diocetylphosphine) dioxide                                                                                                                                                                                                                                                                                                        | 0.00534 | 0.03129 | -1.91 | 0.42639 | 1.00000 | -2.25 | 0.24612 | 1.00000 | -2.33 | 0.05812 | 0.46454 | -1.86 |
| 306.2796 | 10.0 | Clavepictine B                                                                                                                                                                                                                                                                                                                                                           | 0.01516 | 0.07648 | -1.91 | 0.54212 | 1.00000 | -1.30 | 0.40705 | 1.00000 | -1.58 | 0.05367 | 0.44274 | -2.00 |
| 865.7251 | 12.6 | TG(106:12); TG(53:6)                                                                                                                                                                                                                                                                                                                                                     | 0.00008 | 0.00085 | -1.90 | 0.01323 | 0.16407 | -2.41 | 0.01073 | 0.12271 | -2.95 | 0.15745 | 0.83788 | -1.40 |
| 573.4879 | 12.5 | Dieporeticenin                                                                                                                                                                                                                                                                                                                                                           | 0.00015 | 0.00147 | -1.89 | 0.00780 | 0.11210 | -2.69 | 0.01385 | 0.14937 | -2.81 | 0.34254 | 1.00000 | -1.38 |
| 772.5853 | 9.4  | PC(35:2);PE(38:2);PE(72:4);PE(36:2)                                                                                                                                                                                                                                                                                                                                      | 0.00002 | 0.00025 | -1.88 | 0.06950 | 0.51287 | -2.45 | 0.00107 | 0.02532 | -3.66 | 0.03161 | 0.32513 | -1.70 |
| 818.5692 | 9.2  | PE(42:7); PC(39:7)                                                                                                                                                                                                                                                                                                                                                       | 0.00009 | 0.00102 | -1.88 | 0.18598 | 1.00000 | -1.10 | 0.00776 | 0.09588 | -2.39 | 0.01659 | 0.23696 | -2.29 |
| 264.2688 | 12.0 | (2S,5R)-5-(hex-5-en-1-yl)-2-propyldecahydroquinoline;1-methyl-4-(oct-7-en-1-yl)octahydro-2H-quinolizine;7-ethyl-3,5-dipropyldecahydropropyrolo[2,1,5-cd]indolizine;9-Octadecenenitrile, (9Z)-                                                                                                                                                                            | 0.00005 | 0.00056 | -1.87 | 0.00431 | 0.07872 | -2.32 | 0.06913 | 0.45805 | -2.09 | 0.03032 | 0.31960 | -1.89 |
| 844.7386 | 12.4 | SM(44:1)                                                                                                                                                                                                                                                                                                                                                                 | 0.00034 | 0.00301 | -1.83 | 0.01670 | 0.19091 | -3.22 | 0.01091 | 0.12348 | -2.29 | 0.51072 | 1.00000 | -1.56 |
| 759.6374 | 10.3 | SM(38:1)                                                                                                                                                                                                                                                                                                                                                                 | 0.00678 | 0.03892 | -1.83 | 0.18632 | 1.00000 | -1.41 | 0.21307 | 0.93154 | -1.90 | 0.19232 | 0.92362 | -2.02 |
| 587.5033 | 12.6 | Erythrasinate A                                                                                                                                                                                                                                                                                                                                                          | 0.00023 | 0.00218 | -1.81 | 0.00331 | 0.06641 | -3.29 | 0.05002 | 0.37009 | -2.69 | 0.36500 | 1.00000 | -1.28 |
| 123.0560 | 0.6  | 2-Acetylpyrazine;Picolinamide;Isonicotineamide;Isonicotinamide;(Ethylphosphanediyl)dimethanol;Benzenediazonium hydroxide;6-Aminopyridine-3-carbaldehyde;1-(Pyridazin-3-yl)ethanone;Acetylpyrazine;Propanedinitrile, (ethoxymethylene)-;1-Chloro-3-ethoxypropane                                                                                                          | 0.00803 | 0.04466 | -1.78 | 0.95332 | 1.00000 | -1.07 | 0.36987 | 1.00000 | -1.09 | 0.00015 | 0.01054 | -2.71 |
| 788.5202 | 9.4  | PE(40:8); N-Acetyl-leu-leu-leu-leu-tyr-amide                                                                                                                                                                                                                                                                                                                             | 0.00780 | 0.04400 | -1.75 | 0.43489 | 1.00000 | -2.03 | 0.61715 | 1.00000 | -1.54 | 0.01098 | 0.18461 | -4.45 |
| 756.5537 | 7.8  | PC(36:3); PC(72:6); PE(39:3)                                                                                                                                                                                                                                                                                                                                             | 0.00005 | 0.00056 | -1.69 | 0.32556 | 1.00000 | -1.53 | 0.00228 | 0.04204 | -2.91 | 0.00853 | 0.16580 | -1.55 |
| 836.6161 | 9.7  | PC(40:5); LacCer(d18:0/14:0)                                                                                                                                                                                                                                                                                                                                             | 0.00001 | 0.00017 | -1.69 | 0.00113 | 0.03440 | -2.28 | 0.04636 | 0.35206 | -1.46 | 0.01474 | 0.21793 | -2.23 |
| 815.7002 | 11.6 | SM(42:1)                                                                                                                                                                                                                                                                                                                                                                 | 0.00012 | 0.00122 | -1.67 | 0.00059 | 0.02350 | -2.17 | 0.07667 | 0.48751 | -1.91 | 0.32415 | 1.00000 | -1.41 |

S2 Table (continue)

LC-POS-MS

L  
C  
-  
N  
E  
G  
-  
M  
S

|           |      |                                                                                                                                                                                                                                                                                                                                                                                                                                                                                                                                                                                                                                    |         |         |       |         |         |       |         |         |       |         |         |       |
|-----------|------|------------------------------------------------------------------------------------------------------------------------------------------------------------------------------------------------------------------------------------------------------------------------------------------------------------------------------------------------------------------------------------------------------------------------------------------------------------------------------------------------------------------------------------------------------------------------------------------------------------------------------------|---------|---------|-------|---------|---------|-------|---------|---------|-------|---------|---------|-------|
| 838.5568  | 8.9  | PS(40:5)                                                                                                                                                                                                                                                                                                                                                                                                                                                                                                                                                                                                                           | 0.00224 | 0.01504 | -1.66 | 0.24405 | 1.00000 | -1.86 | 0.11299 | 0.61793 | -2.41 | 0.06805 | 0.50340 | 1.20  |
| 575.5033  | 7.8  | Montecristin; Mayolene-19; Ethylenebis(dioctylphosphine) dioxide                                                                                                                                                                                                                                                                                                                                                                                                                                                                                                                                                                   | 0.00825 | 0.04531 | -1.66 | 0.42915 | 1.00000 | -1.82 | 0.08434 | 0.51539 | -3.77 | 0.23892 | 1.00000 | -1.55 |
| 782.5703  | 8.6  | PC(36:4); PC(72:8); PE(39:4)                                                                                                                                                                                                                                                                                                                                                                                                                                                                                                                                                                                                       | 0.00125 | 0.00917 | -1.66 | 0.11114 | 0.72380 | -1.12 | 0.08799 | 0.52933 | -1.70 | 0.10054 | 0.64743 | -1.23 |
| 787.6686  | 11.0 | SM(40:1)                                                                                                                                                                                                                                                                                                                                                                                                                                                                                                                                                                                                                           | 0.00312 | 0.01971 | -1.64 | 0.06955 | 0.51287 | -1.71 | 0.17963 | 0.83830 | -1.83 | 0.22601 | 0.98225 | -1.61 |
| 760.4874  | 9.1  | PE(38:8)                                                                                                                                                                                                                                                                                                                                                                                                                                                                                                                                                                                                                           | 0.00408 | 0.02478 | -1.63 | 0.22369 | 1.00000 | -1.49 | 0.12088 | 0.63882 | -1.87 | 0.22778 | 0.98270 | -1.82 |
| 219.1422  | 0.6  | (S)-3-Mercaptohexyl pentanoate;(S)-3-Methylthiohexyl butyrate; Ethyl (heptylthio)acetate                                                                                                                                                                                                                                                                                                                                                                                                                                                                                                                                           | 0.05873 | 0.23472 | -1.63 | 0.00314 | 0.06407 | -4.65 | 0.99438 | 1.00000 | -1.08 | 0.92710 | 1.00000 | -1.13 |
| 810.5212  | 9.4  | PS(38:5);PE(0:0)                                                                                                                                                                                                                                                                                                                                                                                                                                                                                                                                                                                                                   | 0.00714 | 0.04088 | -1.59 | 0.79917 | 1.00000 | -1.10 | 0.17929 | 0.83830 | -2.19 | 0.02217 | 0.27397 | -1.57 |
| 829.7268  | 12.5 | TG(100:6); TG(50:3); 15-Oleoylsolamin                                                                                                                                                                                                                                                                                                                                                                                                                                                                                                                                                                                              | 0.00400 | 0.02445 | -1.59 | 0.04817 | 0.41238 | -2.32 | 0.07982 | 0.49953 | -2.22 | 0.63524 | 1.00000 | -1.37 |
| 1004.6282 | 9.7  | MIPC(t18:0/18:0(2OH))                                                                                                                                                                                                                                                                                                                                                                                                                                                                                                                                                                                                              | 0.00962 | 0.05148 | -1.57 | 0.04105 | 0.37180 | 1.08  | 0.64647 | 1.00000 | -1.50 | 0.22491 | 0.98154 | -1.69 |
| 186.0443  | 0.6  | Dextrosil                                                                                                                                                                                                                                                                                                                                                                                                                                                                                                                                                                                                                          | 0.00000 | 0.00001 | 4.41  | 0.00046 | 0.03377 | 5.04  | 0.00554 | 0.06587 | 3.18  | 0.00010 | 0.00770 | 5.83  |
| 830.5910  | 9.7  | PS(39:1)                                                                                                                                                                                                                                                                                                                                                                                                                                                                                                                                                                                                                           | 0.00004 | 0.00036 | 3.91  | 0.00285 | 0.07405 | 5.26  | 0.04084 | 0.25688 | 4.57  | 0.07016 | 0.32716 | 2.62  |
| 187.0411  | 0.6  | Isoplumbagin;1-Hydroxy-2-naphthoate;Ramentaceone;F-Honauin A;4-(Furan-2-yl)-2-hydroxybenzaldehyde;1,4-Naphthalenedione, 2-(hydroxymethyl)-;Phenyl 2-furoate;2-acetyl-3-hydroxy-1H-inden-1-one;(1-Oxo-1,3-dihydro-2H-inden-2-ylidene)acetic acid;(Oxan-4-yl)hydrazine--hydrogen chloride (1/1);Pyridinium, 4-(methoxycarbonyl)-1-methyl-;2-Butylisouronium chloride                                                                                                                                                                                                                                                                 | 0.00000 | 0.00000 | 3.51  | 0.00016 | 0.01562 | 4.24  | 0.00557 | 0.06587 | 2.65  | 0.00010 | 0.00770 | 4.44  |
| 772.5853  | 10.4 | PC(35:1);PE(38:1)                                                                                                                                                                                                                                                                                                                                                                                                                                                                                                                                                                                                                  | 0.00000 | 0.00007 | 3.37  | 0.01165 | 0.15700 | 2.76  | 0.00043 | 0.01907 | 3.87  | 0.07038 | 0.32716 | 3.47  |
| 770.5696  | 9.7  | PC(35:2);PE(38:2);PE(72:4);PE(36:2)                                                                                                                                                                                                                                                                                                                                                                                                                                                                                                                                                                                                | 0.00020 | 0.00145 | 3.33  | 0.00582 | 0.10150 | 4.14  | 0.10404 | 0.43448 | 5.01  | 0.11650 | 0.47053 | 2.50  |
| 511.2136  | 0.8  | gibberellin A2 O-beta-D-glucoside;Raucaffricine;4-[(2H-1,3-Benzodioxol-5-yl)methyl]piperazin-1-yl}[1-(2,4-dimethylphenyl)-3-(4-fluorophenyl)-1H-pyrazol-5-yl]methanone                                                                                                                                                                                                                                                                                                                                                                                                                                                             | 0.00000 | 0.00000 | 3.21  | 0.00001 | 0.00302 | 4.35  | 0.00015 | 0.01441 | 3.81  | 0.00308 | 0.06280 | 1.79  |
| 236.0162  | 0.6  | 9-Oxo-9H-thioxanthene-3-carbonitrile;[2-(Methylsulfonyl)-5-(trifluoromethyl)pyridin-3-yl]boronic acid;Butanoic acid, 4,4,4-trinitro-, methyl ester (9CI)                                                                                                                                                                                                                                                                                                                                                                                                                                                                           | 0.02207 | 0.08077 | 2.92  | 0.15067 | 0.72969 | 2.44  | 0.09182 | 0.41977 | 4.05  | 0.95766 | 1.00000 | -1.29 |
| 832.6069  | 10.4 | PS(39:0); Sulfobromophthalein                                                                                                                                                                                                                                                                                                                                                                                                                                                                                                                                                                                                      | 0.00001 | 0.00009 | 2.76  | 0.01411 | 0.16401 | 2.37  | 0.00066 | 0.02246 | 3.80  | 0.05732 | 0.29445 | 2.95  |
| 390.9777  | 0.5  | 4,4'-Sulfonylbis(tetrafluoroaniline);(4-Iodoacetanilido)iminodiacetic acid                                                                                                                                                                                                                                                                                                                                                                                                                                                                                                                                                         | 0.00012 | 0.00089 | 2.70  | 0.02348 | 0.22297 | 2.47  | 0.04351 | 0.25688 | 3.23  | 0.04431 | 0.26761 | 3.81  |
| 751.5312  | 8.3  | PA(40:4)                                                                                                                                                                                                                                                                                                                                                                                                                                                                                                                                                                                                                           | 0.00000 | 0.00004 | 2.69  | 0.00004 | 0.01042 | 5.94  | 0.01869 | 0.15874 | 3.22  | 0.06290 | 0.31344 | 1.85  |
| 281.2476  | 2.8  | Oleic acid; Elaidic acid; Octadec-9-enoic Acid;Vaccenic acid; trans-vaccenic acid;Ethyl 9-hexadecenoate; ethyl 9Z-hexadecenoate;2-methyl-16-heptadecenoic acid;17:1(12)(7Me);3-octadecylenic acid; ;18:1(14E); ;17:1(4)(15Me);11-Cycloheptylundecanoic acid;11E-Hexadecenyl acetate; ;Methyl 14-methyl-8E-hexadecenoate; Methyl 14-methyl-8Z-hexadecenoate;18-Octadecanolide;Petroselinic acid;Palmitoleic Acid ethyl ester;formyl 14-methyl-8E-hexadecenoate;(13R)-13-Hexyl-1-oxacyclotridecan-2-one;2-Propenoic acid, 2-methyl-, tetradecyl ester;(Z)-11-Hexadecenyl acetate;Cyclohexyl laurate;Hexadecanoic acid, ethenyl ester | 0.00466 | 0.02234 | 2.37  | 0.16188 | 0.76796 | 1.90  | 0.18362 | 0.60416 | 2.22  | 0.17188 | 0.60745 | 2.36  |
| 483.1946  | 0.8  | ethyl 4-[[4-(4-methylanilino)-6-[2-(pyridine-4-carbonyl)hydrazinyl]-1,3,5-triazin-2-yl]amino]benzoate;RMI 61,220                                                                                                                                                                                                                                                                                                                                                                                                                                                                                                                   | 0.00000 | 0.00000 | 2.26  | 0.00028 | 0.02357 | 2.54  | 0.00371 | 0.05235 | 2.22  | 0.00001 | 0.00427 | 2.18  |
| 394.9840  | 0.5  | F0817-0263                                                                                                                                                                                                                                                                                                                                                                                                                                                                                                                                                                                                                         | 0.00043 | 0.00289 | 2.25  | 0.03029 | 0.24500 | 2.59  | 0.11646 | 0.46042 | 3.38  | 0.06873 | 0.32716 | 4.00  |
| 718.5382  | 9.5  | PC(31:0); PE(34:0); PE(32:0)                                                                                                                                                                                                                                                                                                                                                                                                                                                                                                                                                                                                       | 0.00077 | 0.00480 | 2.20  | 0.00719 | 0.11225 | 2.82  | 0.24371 | 0.72624 | 1.70  | 0.29491 | 0.84092 | 1.75  |
| 203.0127  | 0.6  | CCCP; aluminum acetate; Honauin A; 3,5-Diamino-4-hydroxybenzene-1-sulfonic acid; [hydroxy-(4-hydroxyphenyl)methyl]phosphonic acid;Buta-1,3-diene-1,1,2,3,4,4-hexacarbonitrile;Carbonyl cyanide chlorophenylhydrazone;NSC690029;Allyl pentafluoropropionate;2,2,3,3,3-Pentafluoropropyl acrylate;1,1,3,3,3-Pentafluoropropyl prop-2-enoate                                                                                                                                                                                                                                                                                          | 0.00011 | 0.00084 | 2.16  | 0.00015 | 0.01562 | 5.85  | 0.32336 | 0.89162 | 2.22  | 0.19588 | 0.64755 | 1.35  |
| 115.0194  | 0.6  | Diammonium sulfite                                                                                                                                                                                                                                                                                                                                                                                                                                                                                                                                                                                                                 | 0.00135 | 0.00781 | 2.12  | 0.51135 | 1.00000 | 1.55  | 0.14106 | 0.50998 | 1.76  | 0.00610 | 0.08413 | 3.53  |
| 714.5069  | 9.0  | PE(34:2);PC(31:2);1-Palmitoyl-2-linoleoyl PE                                                                                                                                                                                                                                                                                                                                                                                                                                                                                                                                                                                       | 0.02664 | 0.09461 | 2.06  | 0.12792 | 0.66543 | 1.51  | 0.30847 | 0.86694 | 4.15  | 0.75706 | 1.00000 | 1.77  |

S2 Table (continue)

L  
C  
-  
N  
E  
-  
M  
S

|          |      |                                                                                                                                                                                                                                                                                                                                                                                                                                                                                                                                                                                                                                                                                                                                                                                                                    |         |         |       |         |         |       |         |         |       |         |         |       |
|----------|------|--------------------------------------------------------------------------------------------------------------------------------------------------------------------------------------------------------------------------------------------------------------------------------------------------------------------------------------------------------------------------------------------------------------------------------------------------------------------------------------------------------------------------------------------------------------------------------------------------------------------------------------------------------------------------------------------------------------------------------------------------------------------------------------------------------------------|---------|---------|-------|---------|---------|-------|---------|---------|-------|---------|---------|-------|
| 245.0423 | 0.6  | PE(34:2);PC(31:2);1-Palmitoyl-2-linoleoyl PE;Glycerophosphoglycerol;Phosphatidyl glycerol;2-Deoxyglucose-1-phosphate;Phosphorothioic acid, O,O-diethyl O-phenyl ester;Butanedioic acid, tetrafluoro-, diethyl ester;Ethanedione, bis(4-fluorophenyl)-;Dibenzo[a,h]pyrene;Bicozamycin;3"-Deamino-3"-oxonicotianamine;Dibenzo[a,h]pyrene;Dibenzo[a,e]fluoranthene;Naphtho[1,2-b]fluoranthene;Naphtho[2,3-e]pyrene;Diphenylphosphine Acid;Thiopyrophosphoramidate, octamethyl-;NSC404668;Bicyclomycin;N-Allyl-7,8-dimethoxy-4,5-dihydronaphtho(1,2-d)[1,3]thiazol-2-amine;5-Amino-4-(ethylcarbonyl)-3'-fluoro[1,1'-biphenyl]-3-carboxylic acid;Dibenzo(a,e)pyrene                                                                                                                                                     | 0.01030 | 0.04243 | 2.03  | 0.01267 | 0.15988 | 4.75  | 0.17117 | 0.58063 | 2.15  | 0.98622 | 1.00000 | 1.39  |
| 135.0299 | 0.6  | Hypoxanthine, Erythronic acid; Threonic acid; L-threonic Acid, 1-Pentanesulfenothioic acid, Ethyl propyl disulfide, Threonate, D-threonic acid, DL-erythronic acid, tetrazolo[1,5-a]pyridin-8-ol, [1,2,4]Triazolo[4,3-c]pyrimidin-5(1H)-one, 4H-Pyrazolo[3,4-b]pyrazin-4-ol                                                                                                                                                                                                                                                                                                                                                                                                                                                                                                                                        | 0.01060 | 0.04336 | 1.97  | 0.01038 | 0.14321 | 3.34  | 0.15320 | 0.54342 | 1.93  | 0.99807 | 1.00000 | 1.25  |
| 399.2551 | 1.4  | 11'-Carboxy-gamma-tocotrienol;Colupulone;Ophiobolin A;16alpha,17-Isopropylidenedioxy-6alpha-methylprogesterone                                                                                                                                                                                                                                                                                                                                                                                                                                                                                                                                                                                                                                                                                                     | 0.00033 | 0.00228 | 1.94  | 0.29391 | 1.00000 | 2.05  | 0.16506 | 0.56578 | -1.18 | 0.00133 | 0.04566 | 2.45  |
| 775.5479 | 9.7  | PG(36:1);1-Stearoyl-2-Oleoyl-sn-Glycero-3-[Phospho-rac-(1-glycerol)]; CHAULMOSULFONE                                                                                                                                                                                                                                                                                                                                                                                                                                                                                                                                                                                                                                                                                                                               | 0.00485 | 0.02280 | 1.84  | 0.02008 | 0.21263 | 4.31  | 0.04972 | 0.28907 | 1.88  | 0.97948 | 1.00000 | 1.34  |
| 173.0073 | 0.6  | Phenylmethanesulfonyl fluoride, Perchloric acid--carbonohydrazonic diamide (1/1), Benzenemethanesulfonyl fluoride, Benzenesulfonyl fluoride, 4-methyl-                                                                                                                                                                                                                                                                                                                                                                                                                                                                                                                                                                                                                                                             | 0.00467 | 0.02234 | 1.74  | 0.04217 | 0.30873 | 2.05  | 0.11026 | 0.45094 | 1.86  | 0.66502 | 1.00000 | 1.03  |
| 279.0306 | 0.6  | Furo[2,3-b]quinoxaline, 3-chloro-2-phenyl-                                                                                                                                                                                                                                                                                                                                                                                                                                                                                                                                                                                                                                                                                                                                                                         | 0.00097 | 0.00580 | 1.60  | 0.00205 | 0.06075 | 1.73  | 0.66635 | 1.00000 | 1.76  | 0.12647 | 0.49999 | 1.41  |
| 331.0834 | 0.6  | Sanguinarine;2',3,5-Trihydroxy-5',7-dimethoxyflavanone;3'-Deoxydryopteracid;Parvisoflavanone;Dihydrotricetin;7,3'-dimethyl ether;Dioclein;5,7,4'-Trihydroxy-8,3'-dimethoxyflavanone;Sulochrin;3-(Tris(acetoxy)silyl)propyl methacrylate;Evernic acid;5-Chloro-2-hydroxy-N-[4-(morpholin-4-yl)phenyl]benzamide;Sodium 1,4-diisobutyl sulfosuccinate                                                                                                                                                                                                                                                                                                                                                                                                                                                                 | 0.00036 | 0.00242 | 1.59  | 0.53911 | 1.00000 | 1.23  | 0.04081 | 0.25688 | 1.78  | 0.00687 | 0.08665 | 1.72  |
| 913.5800 | 9.4  | PI(40:4); PI(40:3)                                                                                                                                                                                                                                                                                                                                                                                                                                                                                                                                                                                                                                                                                                                                                                                                 | 0.03642 | 0.12273 | 1.56  | 0.00150 | 0.04939 | 4.20  | 0.37326 | 0.98374 | -1.04 | 0.81288 | 1.00000 | -1.28 |
| 157.0301 | 0.6  | 1,4-Naphthoquinone;2-Methylidene-1H-indene-1,3(2H)-dione;Piperazine dihydrochloride;4-Chloro-2-hydrazinyl-6-methylpyrimidine;Guanidinoproclavaminc acid;1-Benzyl-3-(trifluoromethyl)piperazine                                                                                                                                                                                                                                                                                                                                                                                                                                                                                                                                                                                                                     | 0.00897 | 0.03771 | 1.47  | 0.14773 | 0.72398 | 1.71  | 0.36701 | 0.97159 | 1.34  | 0.24044 | 0.73496 | 1.47  |
| 427.2861 | 1.9  | Schidigeragenin B;Spirostane-3,6-dione;25-Hydroxyvitamin D3-26,23-lactone;(23S,25R)-25-hydroxycholecalciferol 26,23-lactone;15,20-dihydroxycholest-4,14-dien-3,16-dione;17(20)-Dehydrocryptogenin ;delta5-Convallamarogenin;1,25-Dihydroxy-24-oxo-16-ene-vitamin D3;12-epi-Scalaradial;(22E)-(24S,25S)-25,26-epoxy-11z,24-dihydroxy-22,23-didehydrovitamin D3 / (22E)-(24S,25S)-25,26-epoxy-11z,24-dihydroxy-22,23-didehydrocholecalciferol;Homostypolhydroperoxide;cholest-4,14-dien-15,20-diol-3,16-dione                                                                                                                                                                                                                                                                                                        | 0.00014 | 0.00104 | 1.46  | 0.01304 | 0.16108 | 1.69  | 0.02825 | 0.21477 | 1.79  | 0.14292 | 0.53983 | 1.19  |
| 769.6210 | 10.4 | SM(39:2)                                                                                                                                                                                                                                                                                                                                                                                                                                                                                                                                                                                                                                                                                                                                                                                                           | 0.01715 | 0.06478 | 1.46  | 0.32871 | 1.00000 | 1.70  | 0.01874 | 0.15874 | 3.55  | 0.96141 | 1.00000 | 1.26  |
| 455.3172 | 2.8  | Norselic acid B;(25R)-12alpha-hydroxy-24R,26R-dimethyl-26,27-cyclo-cholest-4-en-3,6-dione;(22S)-1alpha,22,25-trihydroxy-26,27-dimethyl-23,23,24,24-tetradehydrovitamin D3 / (22S)-1alpha,22,25-trihydroxy-26,27-dimethyl-23,23,24,24-tetradehydrocholecalciferol; (22R)-1alpha,22,25-trihydroxy-23,24-tetradehydro-24a,24b-dihomo-20-epivitamin D3 / (22R)-1alpha,22,25-trihydroxy-23,24-tetradehydro-24a,24b-dihomo-20-epicholecalciferol;1alpha-hydroxy-18-(5-hydroxy-5-methyl-2-hexynyl)-23,24,25,26,27-pentanolvitamin D3 / 1alpha-hydroxy-18-(5-hydroxy-5-methyl-2-hexynyl)-23,24,25,26,27-pentanolcholecalciferol;Callystatin A;(22S)-11z,22,25-trihydroxy-26,27-dimethyl-23,23,24,24-tetradehydrovitamin D3 / (22S)-11z,22,25-trihydroxy-26,27-dimethyl-23,23,24,24-tetradehydrocholecalciferol;Dequalinium | 0.00324 | 0.01643 | 1.28  | 0.00301 | 0.07442 | 1.86  | 0.59528 | 1.00000 | 1.24  | 0.44887 | 1.00000 | 1.14  |
| 485.3073 | 7.5  | Trihexyl 2-(acetyloxy)propane-1,2,3-tricarboxylate                                                                                                                                                                                                                                                                                                                                                                                                                                                                                                                                                                                                                                                                                                                                                                 | 0.01903 | 0.07143 | -1.00 | 0.97534 | 1.00000 | 1.01  | 0.05673 | 0.31147 | -1.06 | 0.01609 | 0.15385 | -1.21 |
| 802.6368 | 8.8  | PC(37:0); PE(40:0)                                                                                                                                                                                                                                                                                                                                                                                                                                                                                                                                                                                                                                                                                                                                                                                                 | 0.00439 | 0.02135 | -1.03 | 0.88410 | 1.00000 | -1.20 | 0.00721 | 0.07912 | 91.15 | 0.18611 | 0.62809 | 1.02  |
| 355.1756 | 0.6  | Xanthoplanine;Pibutidine;1alpha,5alpha-Dimercaptoandrostane-3alpha,17beta-diol;5H-Pyridazino(3,4-b)(1,4)benzoxazine, 7-acetyl-2-(2-(diethylamino)ethoxy)-                                                                                                                                                                                                                                                                                                                                                                                                                                                                                                                                                                                                                                                          | 0.00544 | 0.02539 | -1.09 | 0.00084 | 0.04128 | -1.92 | 0.48795 | 1.00000 | -1.10 | 0.96186 | 1.00000 | -1.17 |

S2 Table (continue)

L  
C  
-  
N  
E  
G  
-  
M  
S

|          |      |                                                                                                                                                                                                                                                                                                                                                                                                                                                                                                                                                    |         |         |        |         |         |        |         |         |         |         |         |        |
|----------|------|----------------------------------------------------------------------------------------------------------------------------------------------------------------------------------------------------------------------------------------------------------------------------------------------------------------------------------------------------------------------------------------------------------------------------------------------------------------------------------------------------------------------------------------------------|---------|---------|--------|---------|---------|--------|---------|---------|---------|---------|---------|--------|
| 834.5257 | 9.9  | PS(40:6)                                                                                                                                                                                                                                                                                                                                                                                                                                                                                                                                           | 0.00697 | 0.03039 | -1.20  | 0.21171 | 0.91640 | -1.30  | 0.64169 | 1.00000 | -1.11   | 0.02659 | 0.20478 | -1.23  |
| 187.1078 | 0.6  | N6-Acetyl-L-lysine;N-Alpha-acetyllysine; ;Glycyl-L-leucine;Alanyl-Valine;Isoleucyl-Glycine;Leucyl-Glycine;Valyl-Alanine;6-Acetamido-3-aminohexanoate;N $\mu$ -Acetyl-L-lysine;Nitrosoamylurethane;N-Butyl-N-(2-carboxyethyl)nitrosamine;Pentanamide, N-((hydroxyamino)carbonyl)-2,2-dimethyl-;5-Oxo-L-proline, compound with trimethylamine (1:1);4-(2-Nitrobutyl)morpholine;Carbamic acid, N-(4-morpholinomethyl)-, ethyl ester;Hydrazinecarboxylic acid, (1-ethoxypropylidene)-, ethyl ester;Butanoic acid, 4-((1,1-dimethylethyl)nitrosoamino)- | 0.50687 | 0.91083 | -1.23  | 0.52432 | 1.00000 | 1.34   | 0.99056 | 1.00000 | -1.06   | 0.00433 | 0.06692 | -2.84  |
| 277.0729 | 0.6  | Isophthalic diglycidyl ester; 4-(3,4-Dimethoxybenzoyl)-3-methoxyfuran-2(5H)-one                                                                                                                                                                                                                                                                                                                                                                                                                                                                    | 0.02414 | 0.08676 | -1.32  | 0.24747 | 0.96512 | -1.26  | 0.12808 | 0.48338 | -1.83   | 0.75611 | 1.00000 | -1.22  |
| 397.2254 | 0.9  | tert-Butyl (2S,4S)-2-{4-[2-(azetidin-1-yl)-2-oxoethyl]piperazine-1-carbonyl}-4-fluoropyrrolidine-1-carboxylate; Lapyrium chloride; Carbanilic acid, m-butoxy-N-propyl-, 2-piperidinoethyl ester, hydrochloride                                                                                                                                                                                                                                                                                                                                     | 0.02709 | 0.09563 | -1.36  | 0.19173 | 0.85007 | -1.72  | 0.84600 | 1.00000 | -1.18   | 0.12930 | 0.50736 | -1.50  |
| 885.5501 | 8.6  | PI(38:4);Glc-GP(18:0/20:4(5Z,8Z,11Z,14Z))                                                                                                                                                                                                                                                                                                                                                                                                                                                                                                          | 0.01555 | 0.05948 | -1.41  | 0.92527 | 1.00000 | -1.26  | 0.58440 | 1.00000 | -1.21   | 0.00354 | 0.06280 | -1.72  |
| 742.5392 | 10.0 | PC(33:2); 1,2-Dioleoyl phosphatidyl ethanolamine                                                                                                                                                                                                                                                                                                                                                                                                                                                                                                   | 0.02838 | 0.09841 | -1.46  | 0.73613 | 1.00000 | -1.10  | 0.44402 | 1.00000 | -1.61   | 0.06043 | 0.30521 | -1.33  |
| 766.5394 | 9.9  | PC(35:4);PE(38:4);PE(36:4);PE(76:8);PE(P-38:4)                                                                                                                                                                                                                                                                                                                                                                                                                                                                                                     | 0.02770 | 0.09720 | -1.46  | 0.87379 | 1.00000 | 1.07   | 0.45001 | 1.00000 | -1.57   | 0.02924 | 0.21404 | -1.74  |
| 464.3009 | 0.7  | Glycocholic acid; 3a,7b,12a-Trihydroxyoxocholanyl-Glycine; Sodium glycocholate; Glycocholic Acid; N-[4-(Morpholin-4-yl)-2-[2-(morpholin-4-yl)ethyl]-2-(naphthalen-1-yl)butyl]-4,5-dihydro-1H-imidazol-2-amine                                                                                                                                                                                                                                                                                                                                      | 0.00001 | 0.00018 | -21.45 | 0.03772 | 0.28678 | -23.48 | 0.00045 | 0.01907 | -115.29 | 0.10245 | 0.43086 | -6.11  |
| 514.2835 | 0.6  | Taurocholic acid; Tauroursocolic acid; Taurallocholic acid; Taurocholate; Tauro-b-muricholic acid; Taurohydrocholate; Taurohydrocholic acid;Candoxatril;Atracurium (Quaternary alcohol);2,4-D, dimethylethylamine salt                                                                                                                                                                                                                                                                                                                             | 0.00187 | 0.01019 | -11.45 | 0.23853 | 0.95802 | -4.70  | 0.00780 | 0.08415 | -40.29  | 0.50386 | 1.00000 | -7.61  |
| 448.3059 | 0.7  | Chenodeoxycholic acid glycine conjugate; Glycoursodeoxycholic acid; Chenodeoxyglycocholic acid; Chenodeoxyglycocholate;Glycochenodeoxycholic acid;Glycodeoxycholate;N-(3 $\beta$ ,12 $\beta$ -dihydroxy-5 $\beta$ -cholan-24-oyl)-glycine                                                                                                                                                                                                                                                                                                          | 0.00008 | 0.00066 | -9.59  | 0.30006 | 1.00000 | -2.74  | 0.00189 | 0.03289 | -57.34  | 0.02839 | 0.21314 | -18.32 |
| 769.5014 | 5.1  | PG(36:4)                                                                                                                                                                                                                                                                                                                                                                                                                                                                                                                                           | 0.00000 | 0.00000 | -9.46  | 0.00148 | 0.04939 | -6.21  | 0.00003 | 0.00850 | -10.82  | 0.00001 | 0.00427 | -10.06 |
| 215.0310 | 0.6  | 2-C-Methyl-D-erythritol 4-phosphate; 2,4-Difluoro-9H-fluoren-9-one; 4,4,4-Trifluoro-1-phenyl-1,3-butanedione;                                                                                                                                                                                                                                                                                                                                                                                                                                      | 0.00094 | 0.00577 | -8.80  | 0.05430 | 0.37035 | -6.59  | 0.39566 | 1.00000 | -2.63   | 0.01831 | 0.16965 | -15.95 |
| 561.3787 | 2.8  | Cholesterol glucuronide; Rhodoxanthin                                                                                                                                                                                                                                                                                                                                                                                                                                                                                                              | 0.00347 | 0.01745 | -8.00  | 0.18430 | 0.84071 | -7.73  | 0.04327 | 0.25688 | -6.40   | 0.38760 | 0.98467 | -6.04  |
| 771.5172 | 6.9  | PG(36:3)                                                                                                                                                                                                                                                                                                                                                                                                                                                                                                                                           | 0.00000 | 0.00000 | -7.65  | 0.00148 | 0.04939 | -3.92  | 0.00035 | 0.01907 | -7.38   | 0.00006 | 0.00741 | -8.55  |
| 850.5600 | 8.3  | PE(0:0); PS(41:5)                                                                                                                                                                                                                                                                                                                                                                                                                                                                                                                                  | 0.00000 | 0.00005 | -7.39  | 0.00394 | 0.08338 | -9.94  | 0.00337 | 0.05029 | -10.45  | 0.00792 | 0.09768 | -3.25  |
| 806.4967 | 6.8  | PS(38:6)                                                                                                                                                                                                                                                                                                                                                                                                                                                                                                                                           | 0.00000 | 0.00006 | -7.31  | 0.00065 | 0.04128 | -9.36  | 0.03475 | 0.23684 | -6.23   | 0.00542 | 0.07680 | -12.31 |
| 712.4910 | 8.2  | PE(34:3); PC(31:3)                                                                                                                                                                                                                                                                                                                                                                                                                                                                                                                                 | 0.00000 | 0.00004 | -7.29  | 0.02999 | 0.24500 | -5.86  | 0.00152 | 0.02818 | -7.29   | 0.00164 | 0.04690 | -5.65  |
| 366.1080 | 0.6  | ethyl 6'-amino-5'-cyano-2,2'-dimethyl-1,3-dioxospiro[isoquinoline-4,4'-pyran]-3'-carboxylate;Chromone-2-carboxylic acid, 7-hydroxy-8-(1-piperidinomethyl)-, ethyl ester, hydrochloride;2-cyano-3-(2,3-dimethoxyphenyl)-N-(4-methyl-2-nitrophenyl)prop-2-enamide;2,4-dinitro-6-[2-(1,3,3-trimethylindol-2-ylidene)ethylidene]cyclohexa-2,4-dien-1-one;2,4,6-Trinitrophenol--3-methyl-1,5,6,7,8,8a-hexahydroimidazo[1,5-a]pyridine (1/1)                                                                                                             | 0.00000 | 0.00001 | -6.54  | 0.00513 | 0.09563 | -3.79  | 0.00133 | 0.02623 | -7.43   | 0.00091 | 0.03644 | -15.24 |
| 367.1048 | 0.6  | 3-O-Feruloylquinic acid;3-O-Caffeoyl-4-O-methylquinic acid; ;3-(4-Aminophenyl)-7-(isoquinolin-4-yl)thieno[3,2-c]pyridin-4-amine ;tert-Butyl 4-(((4-bromophenyl)methyl)amino)piperidine-1-carboxylate;Dihydrorhodamine 123;ethyl 6-amino-5-cyano-2,4-diphenyl-4H-pyran-3-carboxylate;Hexananilide, 4'-sulfanyl-;9-(9H-Fluoren-9-yl)-9H-xanthen;spiro[9H-anthracene-10,9'-xanthen];phenyl-(9-phenylfluoren-9-yl)methanone;2-(3-(4-Fluorophenyl)propoxy)-4-phenanthrenol                                                                              | 0.00000 | 0.00007 | -5.68  | 0.01452 | 0.16564 | -3.70  | 0.00386 | 0.05323 | -6.20   | 0.00663 | 0.08665 | -10.68 |
| 824.5436 | 7.7  | PS(39:4)                                                                                                                                                                                                                                                                                                                                                                                                                                                                                                                                           | 0.00001 | 0.00010 | -5.24  | 0.00924 | 0.13371 | -6.73  | 0.02092 | 0.17227 | -6.37   | 0.00294 | 0.06231 | -5.13  |
| 834.5285 | 8.5  | PS(40:6)                                                                                                                                                                                                                                                                                                                                                                                                                                                                                                                                           | 0.00001 | 0.00018 | -5.21  | 0.02999 | 0.24500 | -7.34  | 0.05576 | 0.31147 | -4.54   | 0.00068 | 0.03644 | -6.38  |
| 140.0107 | 0.6  | O-Phosphoethanolamine; 5-Hydroxymethyl-2-furanoate; (2E,4E)-5-carboxypenta-2,4-dienoate; 1-Hydroxy-2-aminoethylphosphonate; O-Phosphorylethanolamine; 3-nitro-1-oxidopyridazin-1-ium; 2-Hydroxy-5-nitropyrimidine                                                                                                                                                                                                                                                                                                                                  | 0.00002 | 0.00022 | -5.14  | 0.07402 | 0.46694 | -2.41  | 0.00819 | 0.08673 | -8.78   | 0.00407 | 0.06692 | -5.44  |
| 507.2714 | 0.9  | LPG(18:2); 26,26,26,27,27-hexafluoro-1alpha-hydroxyvitamin D3 / 26,26,26,27,27-hexafluoro-1alpha-hydroxycholecalciferol;2-[[2-[bis(2-hydroxyethyl)amino]-4,8-dimorpholin-4-yl]pyrimido[5,4-d]pyrimidin-6-yl]-[2-hydroxyethyl]amino]ethanol                                                                                                                                                                                                                                                                                                         | 0.00000 | 0.00007 | -5.12  | 0.05674 | 0.37808 | -3.83  | 0.04189 | 0.25688 | -2.85   | 0.00004 | 0.00741 | -7.94  |



S2 Table (continue)

L  
C  
-  
N  
E  
G  
-  
M  
S

|          |      |                                                                                                                                                                                                                                                                                                                                                                                                                                                                                                                                                                                                                                                                                                                                                                                                                                                                                                                                                                                                                                                                                                          |         |         |       |         |         |       |         |         |        |         |         |       |
|----------|------|----------------------------------------------------------------------------------------------------------------------------------------------------------------------------------------------------------------------------------------------------------------------------------------------------------------------------------------------------------------------------------------------------------------------------------------------------------------------------------------------------------------------------------------------------------------------------------------------------------------------------------------------------------------------------------------------------------------------------------------------------------------------------------------------------------------------------------------------------------------------------------------------------------------------------------------------------------------------------------------------------------------------------------------------------------------------------------------------------------|---------|---------|-------|---------|---------|-------|---------|---------|--------|---------|---------|-------|
| 468.1281 | 0.6  | BUCLADESINE;2-[4-(6-Amino-5-cyano-3-methyl-2,4-dihydropyranol[2,3-c]pyrazol-4-yl)phenoxy]-N-[2-(trifluoromethyl)phenyl]acetamide                                                                                                                                                                                                                                                                                                                                                                                                                                                                                                                                                                                                                                                                                                                                                                                                                                                                                                                                                                         | 0.00050 | 0.00326 | -5.02 | 0.24718 | 0.96512 | -1.42 | 0.01662 | 0.14708 | -3.09  | 0.06381 | 0.31534 | -3.42 |
| 524.2771 | 1.0  | LPE(22:6); Desmosine                                                                                                                                                                                                                                                                                                                                                                                                                                                                                                                                                                                                                                                                                                                                                                                                                                                                                                                                                                                                                                                                                     | 0.00000 | 0.00001 | -4.91 | 0.00091 | 0.04137 | -8.54 | 0.00548 | 0.06587 | -4.22  | 0.00086 | 0.03644 | -3.88 |
| 762.5079 | 8.6  | PE(38:6);PC(35:6);PE(P-38:6)                                                                                                                                                                                                                                                                                                                                                                                                                                                                                                                                                                                                                                                                                                                                                                                                                                                                                                                                                                                                                                                                             | 0.00007 | 0.00057 | -4.72 | 0.02279 | 0.22297 | -5.43 | 0.05638 | 0.31147 | -6.61  | 0.01520 | 0.14781 | -2.80 |
| 861.5495 | 8.8  | PI(36:2)                                                                                                                                                                                                                                                                                                                                                                                                                                                                                                                                                                                                                                                                                                                                                                                                                                                                                                                                                                                                                                                                                                 | 0.00000 | 0.00007 | -4.67 | 0.19165 | 0.85007 | -2.33 | 0.00008 | 0.01115 | -20.46 | 0.01383 | 0.14144 | -2.43 |
| 817.5011 | 4.4  | PG(40:8);Quinquenoside F1;LBPA(20:4(SZ,8Z,11Z,14Z)/20:4(SZ,8Z,11Z,14Z))                                                                                                                                                                                                                                                                                                                                                                                                                                                                                                                                                                                                                                                                                                                                                                                                                                                                                                                                                                                                                                  | 0.00005 | 0.00040 | -4.57 | 0.18367 | 0.84071 | -2.51 | 0.01189 | 0.11557 | -10.37 | 0.00355 | 0.06280 | -4.70 |
| 788.5433 | 8.1  | PS(36:1)                                                                                                                                                                                                                                                                                                                                                                                                                                                                                                                                                                                                                                                                                                                                                                                                                                                                                                                                                                                                                                                                                                 | 0.00000 | 0.00004 | -4.57 | 0.01748 | 0.18849 | -4.97 | 0.00056 | 0.02086 | -4.69  | 0.00873 | 0.09768 | -2.78 |
| 288.1188 | 0.6  | Ophthalmic acid;Chlophedianol;Tabtoxin;;(S)-3,4,5,6-Tetrahydro-5-methyl-1-phenyl-1H-2,5-benzoxazocine hydrochloride;Propiophenone, 3-(benzylmethylamino)-, hydrochloride;4-allyl-5-[1-(3,4-dimethylphenoxy)ethyl]-4H-1,2,4-triazole-3-thiol;Nefopam hydrochloride;Butamisolol                                                                                                                                                                                                                                                                                                                                                                                                                                                                                                                                                                                                                                                                                                                                                                                                                            | 0.00026 | 0.00183 | -4.56 | 0.33712 | 1.00000 | -1.85 | 0.12346 | 0.47233 | -3.45  | 0.00104 | 0.03860 | -6.50 |
| 283.0672 | 0.6  | Xanthosine;Mazindol;2(1H)-Quinolinone, 3-amino-6-chloro-1-methyl-4-phenyl-;N-[[Furan-2-yl)methyl]-N'-quinazolin-6-ylthiourea;Ethanol, 2,2'-((7-nitro-4-benzofurazanyl)imino)bis-, oxide;Nolatrexed;2-Chloro-5-nitro-3-(4,4,5,5-tetramethyl-1,3,2-dioxaborolan-2-yl)pyridine;Dibenz(b,f)imidazo(1,2-d)(1,4)oxazepine, 3-methyl-, hydrochloride;4-Chloro-2-(4-methoxyphenyl)-5-methylquinazoline;Dihydrosterigmatocystin;Atroviridin;O-Demethylforbexanthone;Demethoxykanugin;Cuneatin methyl ether;Fujikinetin methyl ether;3',4'-Dimethoxy-6,7-methylenedioxyisoflavone;Maximaisoflavone D;Derrustone;Tlatlancauyin;Irisolone methyl ether;Boeravinone A;5,7-Dimethoxy-3',4'-methylenedioxy-4-phenylcoumarin;Millettocalyxin A;Milletenin C;7,8-Dimethoxy-3',4'-methylenedioxyflavone;Jacareubin;Ophiopogonone A;NSC345136;Ethyl 3'-hydroxy-5'-(trifluoromethoxy)[1,1'-biphenyl]-4-carboxylate;2',4'-Dimethoxy-5-(trifluoromethyl)[1,1'-biphenyl]-3-carboxylic acid;7,9-Dimethoxy-6-phenyl-[1,3]dioxolo[4,5-g]chromen-8-one;2(1H)-Pyrimidinethione, 3,4-dihydro-1-(4-methyl-2-sulfonyl)-4,4,6-trimethyl- | 0.00003 | 0.00030 | -4.11 | 0.32362 | 1.00000 | -3.18 | 0.00360 | 0.05202 | -4.41  | 0.00237 | 0.05550 | -4.07 |
| 273.0372 | 0.6  | 1-Deoxy-D-alto-heptulose 7-phosphate; O,O-diethyl S-[2-(ethylsulfanyl)-ethyl]phosphorothioate                                                                                                                                                                                                                                                                                                                                                                                                                                                                                                                                                                                                                                                                                                                                                                                                                                                                                                                                                                                                            | 0.00000 | 0.00001 | -4.03 | 0.00698 | 0.11191 | -2.56 | 0.00074 | 0.02246 | -7.69  | 0.00008 | 0.00770 | -6.90 |
| 515.2865 | 0.6  | L-Olivosyl-oleandolide                                                                                                                                                                                                                                                                                                                                                                                                                                                                                                                                                                                                                                                                                                                                                                                                                                                                                                                                                                                                                                                                                   | 0.00867 | 0.03697 | -4.01 | 0.31552 | 1.00000 | -2.72 | 0.00992 | 0.09968 | -10.47 | 0.90885 | 1.00000 | -3.42 |
| 764.5228 | 9.2  | PC(35:5);PE(38:5);PE(P-38:5)                                                                                                                                                                                                                                                                                                                                                                                                                                                                                                                                                                                                                                                                                                                                                                                                                                                                                                                                                                                                                                                                             | 0.00001 | 0.00018 | -3.99 | 0.12757 | 0.66543 | -2.80 | 0.00212 | 0.03487 | -5.30  | 0.00544 | 0.07680 | -3.19 |
| 171.0051 | 0.6  | Glycerol 3-phosphate; sn-Glycerol 1-phosphate; DL-Glycerol 1-phosphate;Beta-Glycerophosphoric acid;((2-Chloroethyl)thio)benzene;Butane-1,4-diyl bis(thiocyanate);1-Chloro-4-((methylthio)methyl)benzene;4-Chloro-2,5-dimethylbenzenethiol;sn-Glycerol 3-phosphate;Phosphoric acid, diethyl p-(methylsulfonyl)phenyl ester                                                                                                                                                                                                                                                                                                                                                                                                                                                                                                                                                                                                                                                                                                                                                                                | 0.00000 | 0.00006 | -3.91 | 0.10341 | 0.61322 | -1.77 | 0.00083 | 0.02246 | -6.55  | 0.00173 | 0.04690 | -4.97 |
| 776.5234 | 9.2  | PC(36:6);PC(72:12);PE(39:6)                                                                                                                                                                                                                                                                                                                                                                                                                                                                                                                                                                                                                                                                                                                                                                                                                                                                                                                                                                                                                                                                              | 0.00001 | 0.00013 | -3.90 | 0.00328 | 0.07791 | -4.61 | 0.00843 | 0.08770 | -5.01  | 0.03763 | 0.25652 | -1.93 |
| 858.5255 | 9.7  | PS(42:8)                                                                                                                                                                                                                                                                                                                                                                                                                                                                                                                                                                                                                                                                                                                                                                                                                                                                                                                                                                                                                                                                                                 | 0.00000 | 0.00006 | -3.83 | 0.00376 | 0.08250 | -7.76 | 0.01304 | 0.12271 | -3.63  | 0.00355 | 0.06280 | -2.28 |
| 816.5746 | 9.4  | PS(38:1)                                                                                                                                                                                                                                                                                                                                                                                                                                                                                                                                                                                                                                                                                                                                                                                                                                                                                                                                                                                                                                                                                                 | 0.00000 | 0.00002 | -3.52 | 0.03888 | 0.29187 | -2.18 | 0.00004 | 0.00850 | -5.30  | 0.00814 | 0.09768 | -2.45 |
| 833.5176 | 7.3  | PI(34:2); PG(42:7)                                                                                                                                                                                                                                                                                                                                                                                                                                                                                                                                                                                                                                                                                                                                                                                                                                                                                                                                                                                                                                                                                       | 0.00207 | 0.01106 | -3.48 | 0.12368 | 0.66543 | -3.76 | 0.01261 | 0.12060 | -6.26  | 0.75493 | 1.00000 | -2.09 |
| 747.4954 | 8.5  | Azythromycin; PA(40:6); Bis(dodecylthio)diocystannane                                                                                                                                                                                                                                                                                                                                                                                                                                                                                                                                                                                                                                                                                                                                                                                                                                                                                                                                                                                                                                                    | 0.00003 | 0.00031 | -3.47 | 0.01730 | 0.18849 | -6.34 | 0.05262 | 0.30003 | -4.23  | 0.00674 | 0.08665 | -2.93 |
| 788.5249 | 8.9  | PE(40:7); PC(37:7)                                                                                                                                                                                                                                                                                                                                                                                                                                                                                                                                                                                                                                                                                                                                                                                                                                                                                                                                                                                                                                                                                       | 0.00000 | 0.00004 | -3.42 | 0.01249 | 0.15988 | -3.59 | 0.00104 | 0.02528 | -4.25  | 0.00440 | 0.06692 | -3.00 |
| 830.4942 | 8.7  | PS(40:8)                                                                                                                                                                                                                                                                                                                                                                                                                                                                                                                                                                                                                                                                                                                                                                                                                                                                                                                                                                                                                                                                                                 | 0.00000 | 0.00006 | -3.30 | 0.00689 | 0.11191 | -4.21 | 0.00339 | 0.05029 | -6.14  | 0.00841 | 0.09768 | -3.06 |
| 498.2886 | 0.6  | Tauroursodeoxycholic acid; ;Taurodeoxycholic acid;;5Î²-CHOLANIC ACID-3Î±, 12Î±-DIOL N-(2-SULPHOETHYL)-AMIDE;Taurochenodeoxycholic acid;N-bis[[1-hydroxy-2,2,6,6-tetramethylpiperidin-4-yl)oxy]phosphorylbutan-2-amine                                                                                                                                                                                                                                                                                                                                                                                                                                                                                                                                                                                                                                                                                                                                                                                                                                                                                    | 0.02017 | 0.07475 | -3.23 | 0.69486 | 1.00000 | -2.01 | 0.04251 | 0.25688 | -11.32 | 0.50785 | 1.00000 | -1.65 |
| 878.5906 | 9.5  | PE(0:0)                                                                                                                                                                                                                                                                                                                                                                                                                                                                                                                                                                                                                                                                                                                                                                                                                                                                                                                                                                                                                                                                                                  | 0.00011 | 0.00084 | -3.19 | 0.00887 | 0.13155 | -7.90 | 0.09554 | 0.42599 | -3.72  | 0.03881 | 0.26149 | -2.21 |
| 773.5327 | 8.3  | PG(36:2);PG(72:4);LBPA(18:1(9Z)/18:1(9Z));PA(O-40:4);PA(P-40:3)                                                                                                                                                                                                                                                                                                                                                                                                                                                                                                                                                                                                                                                                                                                                                                                                                                                                                                                                                                                                                                          | 0.00029 | 0.00199 | -3.16 | 0.22575 | 0.94275 | -1.73 | 0.18062 | 0.60386 | -4.64  | 0.00139 | 0.04566 | -8.88 |
| 845.6739 | 11.3 | TG(104:16);TG(52:8)                                                                                                                                                                                                                                                                                                                                                                                                                                                                                                                                                                                                                                                                                                                                                                                                                                                                                                                                                                                                                                                                                      | 0.00001 | 0.00018 | -3.15 | 0.04458 | 0.31849 | -1.62 | 0.00078 | 0.02246 | -5.26  | 0.05577 | 0.29445 | -2.42 |
| 800.5435 | 7.6  | PS(37:2)                                                                                                                                                                                                                                                                                                                                                                                                                                                                                                                                                                                                                                                                                                                                                                                                                                                                                                                                                                                                                                                                                                 | 0.00098 | 0.00580 | -3.00 | 0.12479 | 0.66543 | -3.89 | 0.05583 | 0.31147 | -3.17  | 0.10923 | 0.44981 | -3.13 |
| 859.5277 | 9.7  | PI(36:3)                                                                                                                                                                                                                                                                                                                                                                                                                                                                                                                                                                                                                                                                                                                                                                                                                                                                                                                                                                                                                                                                                                 | 0.00000 | 0.00006 | -3.00 | 0.00549 | 0.09859 | -3.90 | 0.01143 | 0.11300 | -2.66  | 0.00224 | 0.05541 | -2.60 |
| 856.6867 | 11.7 | PE(44:1);PC(41:1)                                                                                                                                                                                                                                                                                                                                                                                                                                                                                                                                                                                                                                                                                                                                                                                                                                                                                                                                                                                                                                                                                        | 0.00159 | 0.00897 | -2.94 | 0.06004 | 0.39127 | -2.08 | 0.75478 | 1.00000 | -2.84  | 0.00684 | 0.08665 | -3.06 |

S2 Table (continue)

L  
C  
-  
N  
E  
G  
-  
M  
S

|          |      |                                                                                                                                                                                                                                                                                                                                                                                                                                                                                                                                                                                                                                                         |         |         |       |         |         |       |         |         |       |         |         |       |
|----------|------|---------------------------------------------------------------------------------------------------------------------------------------------------------------------------------------------------------------------------------------------------------------------------------------------------------------------------------------------------------------------------------------------------------------------------------------------------------------------------------------------------------------------------------------------------------------------------------------------------------------------------------------------------------|---------|---------|-------|---------|---------|-------|---------|---------|-------|---------|---------|-------|
| 214.0477 | 0.6  | Glycerylphosphorylethanolamine;sn-glycero-3-Phosphoethanolamine; ;2-Phenylthiomorpholine-hydrogen chloride (1/1);3,4'-Difluoro[1,1'-biphenyl]-4-carbonitrile;2-Propanethiol, 1-(p-chloroanilino)-2-methyl-;Galactosamine hydrochloride;Glucosamine hydrochloride;NSC632482;D-Glucose, 3-amino-3-deoxy-, hydrochloride;(Carboxylatomethyl)trimethylammonium phosphate;cycloguanil;1H-Pyrrolo(2,3-d)pyrimidine-5-acetic acid, 2,3,4,7-tetrahydro-2,4-dioxo-1,3,6-trimethyl-;Methyl 4-(dimethoxyphosphoryl)piperidine-1-carboxylate;MLS003171529;NSC403094;2-Methyl-4'-(trifluoromethyl)[1,1'-biphenyl]-3-amine;Methyl 1-(5-nitropyridin-2-yl)-L-prolinate | 0.00023 | 0.00165 | -2.91 | 0.11243 | 0.64653 | -1.91 | 0.02312 | 0.18281 | -4.59 | 0.04236 | 0.26761 | -2.94 |
| 817.6423 | 10.7 | 3-Decaprenyl-4-hydroxybenzoic acid;TG(100:16);TG(50:8);2-decaprenyl-6-methoxy-1,4-benzoquinone                                                                                                                                                                                                                                                                                                                                                                                                                                                                                                                                                          | 0.00952 | 0.03977 | -2.90 | 0.41084 | 1.00000 | -1.37 | 0.09412 | 0.42284 | -3.78 | 0.27317 | 0.80882 | -1.90 |
| 785.6533 | 11.3 | SM(40:1)                                                                                                                                                                                                                                                                                                                                                                                                                                                                                                                                                                                                                                                | 0.00001 | 0.00017 | -2.75 | 0.04291 | 0.31034 | -1.63 | 0.00030 | 0.01907 | -8.15 | 0.09717 | 0.41453 | -2.28 |
| 790.5396 | 9.7  | PC(37:6);PE(40:6);PE(P-40:6)                                                                                                                                                                                                                                                                                                                                                                                                                                                                                                                                                                                                                            | 0.00003 | 0.00031 | -2.73 | 0.02369 | 0.22297 | -4.80 | 0.06328 | 0.33599 | -2.83 | 0.00342 | 0.06280 | -1.68 |
| 346.0544 | 0.6  | 2'-Deoxyguanosine 5'-monophosphate;3'-AMP;2-hydroxy-dAMP;7-alpha-D-Ribosyladenine 5'-phosphate;deoxyguanosine 5'-monophosphate (dGMP);2-Hydroxy-dAMP;PUBCHEM_17796798;(1,3-dioxoisindol-2-yl)methyl 4-(difluoromethoxy)benzoate;Pamabrom [USAN:USP];Anthraquinone, 1-amino-4-hydroxy-2-(mercaptophenyl)-;1H-Pyrazole-4-carboxamide, 4,5-dihydro-3,4-bis(4-chlorophenyl)-N-methyl-                                                                                                                                                                                                                                                                       | 0.00100 | 0.00589 | -2.65 | 0.05909 | 0.38933 | -2.59 | 0.07575 | 0.36520 | -3.59 | 0.17217 | 0.60745 | -1.85 |
| 509.2874 | 1.0  | LPG(18:1)                                                                                                                                                                                                                                                                                                                                                                                                                                                                                                                                                                                                                                               | 0.07299 | 0.20909 | -2.64 | 0.88367 | 1.00000 | -1.61 | 0.99858 | 1.00000 | -1.27 | 0.00432 | 0.06692 | -4.97 |
| 818.5692 | 9.5  | PE(42:6);PC(39:6)                                                                                                                                                                                                                                                                                                                                                                                                                                                                                                                                                                                                                                       | 0.00003 | 0.00029 | -2.54 | 0.00417 | 0.08523 | -5.64 | 0.03094 | 0.22375 | -3.53 | 0.04117 | 0.26761 | -1.93 |
| 805.5037 | 11.1 | N-di-Demethyl roxithromycin; PG(39:7)                                                                                                                                                                                                                                                                                                                                                                                                                                                                                                                                                                                                                   | 0.00000 | 0.00000 | -2.52 | 0.00009 | 0.01325 | -2.60 | 0.00044 | 0.01907 | -3.12 | 0.00006 | 0.00741 | -2.12 |
| 229.0097 | 0.6  | D-Ribulose 5-phosphate; Xylulose 5-phosphate; L-Ribulose 5-phosphate; L-Xylulose 5-phosphate; Endothal-disodium; Disodium endothal; 7-Hydroxy-4-trifluoromethylcoumarin; 5,5'-Dithiobis(1-methyltetrazole)                                                                                                                                                                                                                                                                                                                                                                                                                                              | 0.00010 | 0.00079 | -2.44 | 0.00131 | 0.04939 | -2.94 | 0.11306 | 0.45300 | -1.84 | 0.13875 | 0.53084 | -2.40 |
| 792.5545 | 10.0 | PC(37:5); PE(40:5)                                                                                                                                                                                                                                                                                                                                                                                                                                                                                                                                                                                                                                      | 0.00001 | 0.00008 | -2.41 | 0.02141 | 0.22274 | -2.14 | 0.01792 | 0.15632 | -2.96 | 0.00092 | 0.03644 | -1.86 |
| 619.2873 | 0.8  | 1-Arachidonoylglycerophosphoinositol; PI(20:4(5Z,8Z,11Z,14Z)/0:0);1-Benzyl-2-octadecyl-1H-benzimidazole-6-sulfonic acid                                                                                                                                                                                                                                                                                                                                                                                                                                                                                                                                 | 0.00052 | 0.00337 | -2.41 | 0.50093 | 1.00000 | -1.74 | 0.06688 | 0.33900 | -1.73 | 0.00371 | 0.06280 | -3.04 |
| 337.0936 | 0.6  | 3-O-p-Coumaroylquinic acid; ;alpha-Hydrojuglone 4-O-b-D-glucoside;Hydrojuglone glucoside;1-Caffeoyl-4-deoxyquinic acid;N-(tert-Butoxycarbonyl)-5-chloro-L-tryptophan;Benzhydryl 4-methylbenzenesulfonate;BIS(ETHOXYCARBONYLMETHYL) BENZENE-1,4-DICARBOXYLATE;1,2,4,5-Benzenetetracarboxylic acid, dipropyl ester;4-Methylumbelliferyl-galactopyranoside                                                                                                                                                                                                                                                                                                 | 0.00000 | 0.00005 | -2.40 | 0.02614 | 0.23395 | -2.31 | 0.00150 | 0.02818 | -2.47 | 0.00254 | 0.05575 | -2.00 |
| 880.6061 | 9.7  | PS(43:4)                                                                                                                                                                                                                                                                                                                                                                                                                                                                                                                                                                                                                                                | 0.00019 | 0.00141 | -2.39 | 0.00809 | 0.12301 | -3.04 | 0.10177 | 0.43420 | -1.76 | 0.08744 | 0.38408 | -1.82 |
| 349.0936 | 0.6  | 3-Feruloyl-1,5-quinolactone;6-[2,3-Dihydroxy-1-(hydroxymethyl)propyl]-1,2-dihydro-7-hydroxy-9-methoxy-cyclopenta[c][1]benzopyran-3,4-dione;CAY10648;4-[(1-benzoyl-3-methyl-5-oxo-4H-pyrazol-4-yl)diazenyl]benzoic acid;2,3-diphenyl-5-(trifluoromethyl)quinoxaline;N~1~,N~3~-Bis(2-nitrophenyl)benzene-1,3-diamine                                                                                                                                                                                                                                                                                                                                      | 0.00000 | 0.00001 | -2.36 | 0.00100 | 0.04237 | -2.27 | 0.00128 | 0.02623 | -1.83 | 0.00184 | 0.04734 | -3.34 |
| 831.4976 | 8.7  | PI(34:3)                                                                                                                                                                                                                                                                                                                                                                                                                                                                                                                                                                                                                                                | 0.00000 | 0.00006 | -2.36 | 0.01246 | 0.15988 | -2.44 | 0.00611 | 0.06840 | -2.79 | 0.01927 | 0.17295 | -1.53 |
| 911.5642 | 8.7  | PI(40:5)                                                                                                                                                                                                                                                                                                                                                                                                                                                                                                                                                                                                                                                | 0.00097 | 0.00580 | -2.36 | 0.47846 | 1.00000 | -1.49 | 0.03969 | 0.25688 | -5.50 | 0.02233 | 0.17893 | -3.30 |
| 788.5232 | 8.8  | PE(40:7); PC(37:7)                                                                                                                                                                                                                                                                                                                                                                                                                                                                                                                                                                                                                                      | 0.00623 | 0.02776 | -2.36 | 0.27484 | 1.00000 | -3.43 | 0.12961 | 0.48338 | -3.66 | 0.19948 | 0.64995 | -1.16 |
| 773.5329 | 8.2  | PG(36:2); PG(72:4); LBPA(18:1(9Z)/18:1(9Z))                                                                                                                                                                                                                                                                                                                                                                                                                                                                                                                                                                                                             | 0.02999 | 0.10278 | -2.36 | 0.74202 | 1.00000 | -1.11 | 0.87972 | 1.00000 | -3.22 | 0.00861 | 0.09768 | -6.74 |

S2 Table (continue)

L  
C  
-  
N  
E  
G  
-  
M  
S

|          |      |                                                                                                                                                                                                                                                                                                                                                                                                                                                                                                                                                                                                                                                                                                                                                                                                                                                                                                                                                                                                                                     |         |         |       |         |         |       |         |         |       |         |         |       |
|----------|------|-------------------------------------------------------------------------------------------------------------------------------------------------------------------------------------------------------------------------------------------------------------------------------------------------------------------------------------------------------------------------------------------------------------------------------------------------------------------------------------------------------------------------------------------------------------------------------------------------------------------------------------------------------------------------------------------------------------------------------------------------------------------------------------------------------------------------------------------------------------------------------------------------------------------------------------------------------------------------------------------------------------------------------------|---------|---------|-------|---------|---------|-------|---------|---------|-------|---------|---------|-------|
| 289.0724 | 0.6  | Epicatechin; Catechin; ;3-Hydroxyphloretin;gamma-Pyrufuluran;alpha-Cotonefuran;cis-3 and trans-2-Hexenyl propionate;Marshrin;Fonsecin;Cartorimine;6-Hydroxy-alpha-pyrufuluran;Luteoforol;Robinetinidol; ;Mesquitol;(2R-cis)-2-(2,5-Dihydroxyphenyl)-3,4-dihydro-2H-1-benzopyran-3,5,7-triol;(2R,3R)-3,5,7,3',5'-Pentahydroxyflavan;Fisetinidol-4beta-ol; Fisetinidol-4alpha-ol; Epifisetinidol-4alpha-ol; ent-Fisetinidol-4beta-ol; ent-Epifisetinidol-4beta-ol;Oritin-4beta-ol; Epioritin-4alpha-ol; Epioritin-4beta-ol;Nubigenol;3,4,2',4',alpha-Pentahydroxydihydrochalcone;2,8-Dihydroxy-3,4,7-trimethoxydibenzofuran;Ptaeroglycol;Mikanolide;Isolepimericin; Plumericin;Chloroxuron;cis-3,4-Leucopelargonidin;Cianidanol;dimethyl 5,9-dioxo-7,8-dihydro-6H-benzo[7]annulene-6,8-dicarboxylate;[1,2,5]Oxadiazolo[3,4-d]pyridazine, diphenyl-, 1-oxide;(-)-Epicatechin;Gerfelin;Naphthoquinone, 2-chloro-3-(4-methylpiperazin-1-yl);-1,3-Disiloxanediol, 1,3-dimethyl-1,3-diphenyl-                                              | 0.00002 | 0.00025 | -2.35 | 0.05518 | 0.37183 | -1.91 | 0.02897 | 0.21748 | -2.46 | 0.00174 | 0.04690 | -3.48 |
| 179.0544 | 0.6  | D-Glucose; D-Galactose; D-Mannose; Beta-D-Glucose; Allose; Alpha-D-Glucose; Beta-D-Galactose; L-Gulose; L-Galactose; Alpha-D-Glucopyranoside; D-Glucopyranoside; 3(S)-hydroxy-all-cis-8,11,14,17-eicosatetraenoyl-CoA; D-Aldose; alpha-D-Mannose; D-Allose; beta-D-Mannose; D-Altrose; D-Gulose; D-Idose; D-Talose; L-Altrose; L-Idose;Myoinositol; Scyllitol; Levoinositol; 1L-chiro-Inositol; muco-Inositol; scyllo-Inositol;3-Deoxyarabinohehexonic acid;Dihydroxyacetone (dimer);Glycoprotein-phospho-D-mannose; Galactose;D-Fuconate; L-Fuconate; L-Rhamnonate;D-Hamamelose; beta-D-Hamamelopyranose;2-Deoxy-D-gluconate;1,3-Dihydroxyacetone;tetrahydrobenzothiepine-1-oxide;2,3,4,5-tetrahydro-1-benzothiepin-5-ol;1,3-Dihydroxyacetone dimer;NSC625042;alpha-L-Sorbopyranose                                                                                                                                                                                                                                                | 0.00000 | 0.00006 | -2.32 | 0.00077 | 0.04128 | -2.15 | 0.01489 | 0.13583 | -2.32 | 0.01749 | 0.16466 | -1.55 |
| 326.0626 | 0.6  | Fluazifop;O-Desmethyloxotolrestat;Asn-Ser-OH;2-Methoxy-5-[2-methoxy-5-(trifluoromethyl)phenyl]pyridine-3-carboxylic acid;Glysobuzole;2-(4-Fluorophenyl)-5-[(2-methyl-5-nitrophenyl)methyl]thiophene                                                                                                                                                                                                                                                                                                                                                                                                                                                                                                                                                                                                                                                                                                                                                                                                                                 | 0.00621 | 0.02776 | -2.27 | 0.94017 | 1.00000 | -1.04 | 0.03180 | 0.22458 | -3.32 | 0.05663 | 0.29445 | -3.16 |
| 792.5541 | 10.2 | PC(37:5); PE(40:5)                                                                                                                                                                                                                                                                                                                                                                                                                                                                                                                                                                                                                                                                                                                                                                                                                                                                                                                                                                                                                  | 0.02833 | 0.09841 | -2.25 | 0.39647 | 1.00000 | -1.70 | 0.49990 | 1.00000 | -2.04 | 0.16537 | 0.60289 | -2.02 |
| 714.5077 | 9.1  | PE(34:2); PC(31:2); 1-Palmitoyl-2-linoleoyl PE                                                                                                                                                                                                                                                                                                                                                                                                                                                                                                                                                                                                                                                                                                                                                                                                                                                                                                                                                                                      | 0.00478 | 0.02269 | -2.24 | 0.40753 | 1.00000 | -2.07 | 0.20275 | 0.64295 | -2.80 | 0.06864 | 0.32716 | -2.47 |
| 353.1594 | 0.7  | Valganciclovir;1H-Indole-2-carboxamide, N-(2-ethoxyphenyl)-3-(2-hydrazinoethoxy)-;1,3-Propanediamine, N'-(2-methoxy-1-nitro-9-acridinyl)-N,N-dimethyl-;Morphinan-3,14-diol, 6-azido-4,5-epoxy-17-(2-propenyl)-(5-alpha,6-beta)-                                                                                                                                                                                                                                                                                                                                                                                                                                                                                                                                                                                                                                                                                                                                                                                                     | 0.00000 | 0.00001 | -2.17 | 0.00516 | 0.09563 | -2.27 | 0.00017 | 0.01441 | -5.18 | 0.00488 | 0.07230 | -1.69 |
| 467.1551 | 0.6  | PRIM-O-GLUCOSYLICMIFUGIN;AC1NPXPU;N-[(4-tert-butylphenyl)methylideneamino]-4-(4-pyrrolidin-1-ylsulfonylphenyl)-1,3-thiazol-2-amine;Strychnine phosphate dihydrate                                                                                                                                                                                                                                                                                                                                                                                                                                                                                                                                                                                                                                                                                                                                                                                                                                                                   | 0.01602 | 0.06089 | -2.15 | 0.03057 | 0.24500 | -2.51 | 0.47887 | 1.00000 | -1.99 | 0.67667 | 1.00000 | -1.70 |
| 540.0524 | 0.6  | Cyclic ADP-ribose;GW 4064                                                                                                                                                                                                                                                                                                                                                                                                                                                                                                                                                                                                                                                                                                                                                                                                                                                                                                                                                                                                           | 0.00276 | 0.01410 | -2.15 | 0.29142 | 1.00000 | -1.98 | 0.06403 | 0.33599 | -3.15 | 0.13473 | 0.51879 | -2.69 |
| 756.5531 | 9.4  | PC(34:2);PC(68:4);PE(37:2)                                                                                                                                                                                                                                                                                                                                                                                                                                                                                                                                                                                                                                                                                                                                                                                                                                                                                                                                                                                                          | 0.00002 | 0.00023 | -2.07 | 0.06777 | 0.43215 | -1.76 | 0.00556 | 0.06587 | -2.39 | 0.00834 | 0.09768 | -2.32 |
| 764.5229 | 9.4  | PC(35:5), PE(38:5); PE(P-38:5)                                                                                                                                                                                                                                                                                                                                                                                                                                                                                                                                                                                                                                                                                                                                                                                                                                                                                                                                                                                                      | 0.01995 | 0.07442 | -2.03 | 0.36847 | 1.00000 | -2.15 | 0.56832 | 1.00000 | -2.69 | 0.08549 | 0.37830 | -1.61 |
| 279.2317 | 8.8  | Linoleic acid; Linoelaidic acid; 9Z,12E-octadecadienoic acid; 9E,12Z-octadecadienoic acid;Bovinic acid; 9E,11E-Octadecadienoic acid; 10E,12Z-Octadecadienoic acid; Ricinenic acid;Mangiferic acid;Linalyl caprylate;Ethyl 2E,4Z-hexadecadienoate;5-Octadecynoic acid;Octadecadienoate;16-methyl-6Z,9Z-heptadecadienoic acid;16:2[2E,4E](4Me,6Me[S]);Sebaleic acid;Tariric acid;8-octadecynoic acid;Stearolic acid;Malvalic acid;Chaulmoogric acid;10E,12E-Hexadecadienyl acetate; 10E,12Z-Hexadecadienyl acetate; 10Z,12E-Hexadecadienyl acetate;11-Hexadecynyl acetate;Ethyl (Z,Z)-11,13-hexadecadienoate;(E)-3,7-Dimethyl-2,6-octadienyl octanoate; (Z)-3,7-Dimethyl-2,6-octadienyl octanoate;9-octadecen-4-olide; 9Z-octadecadien-4R-olide;9(Z),11(E)-Conjugated Linoleic Acid;5E,12Z-otadecadienoic acid;6-octadecynoic acid;C18:2n-12;6-Octadecynoic acid; Tariric acid; 6,7-Stearolic acid; 6-Stearolic acid;4-Dodecyl-5-ethyl-2(5H)-furanone;Hexadeca-7,11-dien-1-yl acetate (Z,E)-;trans-10,cis-12-Conjugated linoleic acid | 0.00003 | 0.00031 | -2.02 | 0.02878 | 0.24500 | -1.47 | 0.00326 | 0.05029 | -3.97 | 0.07603 | 0.34681 | -1.56 |
| 648.6290 | 12.0 | N-Lignoceroylsphingosine; Ceramide (d18:1/24:0);Cer(d18:0/24:1(15Z))                                                                                                                                                                                                                                                                                                                                                                                                                                                                                                                                                                                                                                                                                                                                                                                                                                                                                                                                                                | 0.00022 | 0.00159 | -1.98 | 0.01392 | 0.16401 | -2.35 | 0.04007 | 0.25688 | -2.30 | 0.17046 | 0.60745 | -1.56 |

S2 Table (continue)

L  
C  
-  
N  
E  
G  
-  
M  
S

|          |      |                                                                                                                                                                                                                                                                                                                                                                                                                                                                                                                                                                                                                                                                                                                                                                                                                                                                                                                                                                                                                                                                                                      |         |         |       |         |         |       |         |         |       |         |         |       |
|----------|------|------------------------------------------------------------------------------------------------------------------------------------------------------------------------------------------------------------------------------------------------------------------------------------------------------------------------------------------------------------------------------------------------------------------------------------------------------------------------------------------------------------------------------------------------------------------------------------------------------------------------------------------------------------------------------------------------------------------------------------------------------------------------------------------------------------------------------------------------------------------------------------------------------------------------------------------------------------------------------------------------------------------------------------------------------------------------------------------------------|---------|---------|-------|---------|---------|-------|---------|---------|-------|---------|---------|-------|
| 807.4976 | 8.9  | PI(32:1);Hebevoside I                                                                                                                                                                                                                                                                                                                                                                                                                                                                                                                                                                                                                                                                                                                                                                                                                                                                                                                                                                                                                                                                                | 0.00378 | 0.01882 | -1.98 | 0.19133 | 0.85007 | -1.61 | 0.18096 | 0.60386 | -2.44 | 0.16546 | 0.60289 | -1.96 |
| 783.4973 | 9.1  | Ginsenoside C; Gypenoside LXXV                                                                                                                                                                                                                                                                                                                                                                                                                                                                                                                                                                                                                                                                                                                                                                                                                                                                                                                                                                                                                                                                       | 0.01406 | 0.05412 | -1.97 | 0.90706 | 1.00000 | -1.61 | 0.12902 | 0.48338 | -2.33 | 0.06638 | 0.32265 | -1.85 |
| 723.4957 | 8.8  | PA(38:4)                                                                                                                                                                                                                                                                                                                                                                                                                                                                                                                                                                                                                                                                                                                                                                                                                                                                                                                                                                                                                                                                                             | 0.00627 | 0.02776 | -1.96 | 0.83660 | 1.00000 | -1.37 | 0.89052 | 1.00000 | -1.98 | 0.00019 | 0.01227 | -5.59 |
| 620.5980 | 11.7 | Ceramide (d18:1/22:0)                                                                                                                                                                                                                                                                                                                                                                                                                                                                                                                                                                                                                                                                                                                                                                                                                                                                                                                                                                                                                                                                                | 0.00079 | 0.00486 | -1.92 | 0.40920 | 1.00000 | -1.48 | 0.04078 | 0.25688 | -2.27 | 0.02115 | 0.17416 | -1.64 |
| 840.5739 | 9.2  | PS(40:3)                                                                                                                                                                                                                                                                                                                                                                                                                                                                                                                                                                                                                                                                                                                                                                                                                                                                                                                                                                                                                                                                                             | 0.00272 | 0.01400 | -1.90 | 0.24901 | 0.96512 | -1.64 | 0.04185 | 0.25688 | -2.73 | 0.23291 | 0.71935 | -1.71 |
| 247.0624 | 0.6  | Coriandrone E; Propanoic acid, 2-hydroxy-3-[[4-hydroxy-1-naphthalenyl]oxy]-; EX-527; 1-Benzyl-4-carbamoylpyridin-1-ium chloride; 3-[[[(Thiophen-2-yl)methoxymethyl]phenyl]boronic acid; 9-Aminoacridine, monohydrochloride, monohydrate; N-(2-Phenylpyridin-3-yl)acetamide--hydrogen chloride (1/1); 2H-Pyran-2-one, 6-(2,4-dihydroxy-6-methylphenyl)-4-methoxy-; 4H-1-Benzopyran-2-carboxylic acid, 5-methoxy-4-oxo-, ethyl ester; Ethanone, 1-(4-amino-5-(p-chlorophenyl)-2-methyl-1H-pyrrol-3-yl)-; Propylsilanetriyl triacetate; Harmine hydrochloride; Methyl 4-(acetyloxy)-2-methyl-1-benzofuran-6-carboxylate; Ungeremine; (4R)-4-[[4-Cyanophenyl]methyl]-L-proline--hydrogen chloride (1/1); 3-Acetyl-6-methoxy-1,2-phenylene diacetate; 2(3H)-Benzoxazolone, 6-chloro-3-(1-piperidinylmethyl)-; Toluene-2,4,5-triol, triacetate; (4,6,7-trimethoxy-1-benzofuran-3-yl) acetate; Pyrido(2,3,4,5-lmn)phenanthridine-5,10-dione, 2,7-diamino-4,9-dihydro-; 5,6,7,8-Tetramethoxycoumarin; Metomidate hydrochloride; Pyrrole-3-carboxylic acid, 4-amino-5-phenyl-, ethyl ester, monohydrochloride | 0.00670 | 0.02943 | -1.90 | 0.11817 | 0.65765 | -1.78 | 0.12103 | 0.47103 | -2.17 | 0.47853 | 1.00000 | -1.83 |
| 831.6588 | 11.0 | TG(102:16); TG(51:8); 2-Decaprenyl-6-methoxy-3-methyl-1,4-benzoquinone                                                                                                                                                                                                                                                                                                                                                                                                                                                                                                                                                                                                                                                                                                                                                                                                                                                                                                                                                                                                                               | 0.00180 | 0.00989 | -1.90 | 0.25690 | 0.98284 | -1.38 | 0.09823 | 0.42856 | -2.07 | 0.05595 | 0.29445 | -2.14 |
| 830.6642 | 9.8  | PC(39:0); PE(42:0)                                                                                                                                                                                                                                                                                                                                                                                                                                                                                                                                                                                                                                                                                                                                                                                                                                                                                                                                                                                                                                                                                   | 0.00240 | 0.01273 | -1.89 | 0.86093 | 1.00000 | -1.47 | 0.00861 | 0.08806 | -3.23 | 0.08153 | 0.36350 | -1.52 |
| 771.6377 | 11.0 | SM(39:1)                                                                                                                                                                                                                                                                                                                                                                                                                                                                                                                                                                                                                                                                                                                                                                                                                                                                                                                                                                                                                                                                                             | 0.00140 | 0.00799 | -1.88 | 0.24875 | 0.96512 | -1.35 | 0.06970 | 0.34734 | -2.36 | 0.06073 | 0.30521 | -2.07 |
| 859.6901 | 11.6 | TG(106:16); TG(53:8)                                                                                                                                                                                                                                                                                                                                                                                                                                                                                                                                                                                                                                                                                                                                                                                                                                                                                                                                                                                                                                                                                 | 0.00005 | 0.00045 | -1.81 | 0.00171 | 0.05347 | -2.37 | 0.03181 | 0.22458 | -2.63 | 0.18547 | 0.62809 | -1.58 |
| 799.6690 | 11.6 | SM(41:1)                                                                                                                                                                                                                                                                                                                                                                                                                                                                                                                                                                                                                                                                                                                                                                                                                                                                                                                                                                                                                                                                                             | 0.00008 | 0.00062 | -1.79 | 0.00275 | 0.07405 | -2.33 | 0.03031 | 0.22375 | -2.57 | 0.20870 | 0.67261 | -1.48 |
| 850.4827 | 9.1  | PS(0:0), Chivosazole B                                                                                                                                                                                                                                                                                                                                                                                                                                                                                                                                                                                                                                                                                                                                                                                                                                                                                                                                                                                                                                                                               | 0.00179 | 0.00989 | -1.78 | 0.18211 | 0.84071 | -2.48 | 0.25691 | 0.75795 | -2.19 | 0.04166 | 0.26761 | -1.42 |
| 805.5682 | 8.8  | PA(44:5)                                                                                                                                                                                                                                                                                                                                                                                                                                                                                                                                                                                                                                                                                                                                                                                                                                                                                                                                                                                                                                                                                             | 0.00001 | 0.00017 | -1.77 | 0.10289 | 0.61322 | -1.33 | 0.00028 | 0.01907 | -5.75 | 0.04429 | 0.26761 | -1.78 |
| 292.0428 | 0.6  | 1-(3-Bromophenyl)-3-tert-butyl-1H-pyrazol-5-amine                                                                                                                                                                                                                                                                                                                                                                                                                                                                                                                                                                                                                                                                                                                                                                                                                                                                                                                                                                                                                                                    | 0.00003 | 0.00028 | -1.74 | 0.00071 | 0.04128 | -1.96 | 0.02029 | 0.16949 | -1.49 | 0.22120 | 0.70049 | -1.31 |
| 803.6275 | 10.3 | TG(49:8)                                                                                                                                                                                                                                                                                                                                                                                                                                                                                                                                                                                                                                                                                                                                                                                                                                                                                                                                                                                                                                                                                             | 0.00577 | 0.02629 | -1.69 | 0.44079 | 1.00000 | -1.34 | 0.11109 | 0.45122 | -2.17 | 0.11154 | 0.45617 | -2.49 |
| 915.5988 | 8.8  | Glycerol 2-(9Z,12Z-octadecadienoate) 1-hexadecanoate 3-O-[alpha-D-galactopyranosyl-(1->6)-beta-D-galactopyranoside]; OH-Chlorobactene glucoside laurate                                                                                                                                                                                                                                                                                                                                                                                                                                                                                                                                                                                                                                                                                                                                                                                                                                                                                                                                              | 0.00005 | 0.00042 | -1.68 | 0.27141 | 1.00000 | -1.20 | 0.00210 | 0.03487 | -2.16 | 0.01382 | 0.14144 | -1.48 |
| 742.6075 | 10.1 | TG(44:1)                                                                                                                                                                                                                                                                                                                                                                                                                                                                                                                                                                                                                                                                                                                                                                                                                                                                                                                                                                                                                                                                                             | 0.02434 | 0.08693 | -1.66 | 0.91119 | 1.00000 | 1.10  | 0.22351 | 0.67279 | -1.94 | 0.07272 | 0.33430 | -1.64 |
| 724.4819 | 12.2 | Spirolide E                                                                                                                                                                                                                                                                                                                                                                                                                                                                                                                                                                                                                                                                                                                                                                                                                                                                                                                                                                                                                                                                                          | 0.00189 | 0.01021 | -1.65 | 0.94135 | 1.00000 | 1.04  | 0.07882 | 0.37695 | -1.91 | 0.00243 | 0.05550 | -1.68 |
| 766.6175 | 9.9  | 1-(10-methylhexadecanyl)-2-(8-[3]-ladderane-octanyl)-sn-glycerophosphocholine; GlcCer(d18:2/21:0); GalCer(d18:2/21:0)                                                                                                                                                                                                                                                                                                                                                                                                                                                                                                                                                                                                                                                                                                                                                                                                                                                                                                                                                                                | 0.02874 | 0.09909 | -1.64 | 0.84913 | 1.00000 | -1.02 | 0.48110 | 1.00000 | -1.92 | 0.03122 | 0.22576 | -1.80 |
| 241.0103 | 0.6  | Inositol cyclic phosphate; 6-Deoxy-5-ketofructose 1-phosphate; 5-Dimethyldithiocarbamylpicolinic acid; 2-(Ethylsulphonyl)benzothiazol-6-amine; 2,4-Dinitrophenyl methyl carbonate; NSC522047; Aureothricin; Germane, trimethyl(4-(methylthio)phenyl)-; Ethyl 3-amino-4-cyano-5-(methylsulfanyl)thiophene-2-carboxylate; Ethyl heptafluorobutyrate; 5-[[2-Bromophenyl]methyl]tetrazolidine                                                                                                                                                                                                                                                                                                                                                                                                                                                                                                                                                                                                                                                                                                            | 0.01114 | 0.04495 | -1.64 | 0.92262 | 1.00000 | -1.05 | 0.15790 | 0.55079 | -1.39 | 0.02443 | 0.19061 | -2.09 |
| 826.5603 | 8.6  | PS(39:3)                                                                                                                                                                                                                                                                                                                                                                                                                                                                                                                                                                                                                                                                                                                                                                                                                                                                                                                                                                                                                                                                                             | 0.00394 | 0.01945 | -1.61 | 0.26343 | 0.99837 | -1.19 | 0.09310 | 0.42143 | -2.37 | 0.16572 | 0.60289 | -1.48 |
| 742.5390 | 8.8  | PC(33:2); PE(36:2); PE(72:4); 1,2-Dioleoyl phosphatidyl ethanolamine                                                                                                                                                                                                                                                                                                                                                                                                                                                                                                                                                                                                                                                                                                                                                                                                                                                                                                                                                                                                                                 | 0.00004 | 0.00035 | -1.57 | 0.13831 | 0.70704 | -1.28 | 0.00113 | 0.02585 | -4.04 | 0.04530 | 0.26863 | -1.38 |
| 878.5132 | 10.1 | PS(0:0)                                                                                                                                                                                                                                                                                                                                                                                                                                                                                                                                                                                                                                                                                                                                                                                                                                                                                                                                                                                                                                                                                              | 0.01092 | 0.04437 | -1.56 | 0.95895 | 1.00000 | -1.15 | 0.17135 | 0.58063 | -1.85 | 0.01491 | 0.14734 | -1.92 |
| 743.6062 | 10.3 | SM(37:1); PE(40:1)                                                                                                                                                                                                                                                                                                                                                                                                                                                                                                                                                                                                                                                                                                                                                                                                                                                                                                                                                                                                                                                                                   | 0.00251 | 0.01318 | -1.55 | 0.26435 | 0.99837 | -1.38 | 0.09202 | 0.41977 | -2.07 | 0.09279 | 0.40162 | -2.55 |
| 217.0512 | 0.6  | Liqcoumarin; 8-Hydroxy-2-methoxy-6-methyl-1,4-naphthoquinone; 4-Methylumbelliferyl acetate; Piperic acid; 2-Hydroxy-6-oxo-6-phenylhexa-2,4-dienoate; 2,2',3'-Trihydroxydiphenylether; Aristolindiquinone; 2,7-Dihydroxy-5-methyl-1-naphthoate; (2-Methyl-4-oxo-4H-1-benzopyran-8-yl)acetic acid; (7R)-7-Methyl-7H-furo[3,2-h][2]benzopyran-3,9(2H,6H)-dione; 3,3'-(1,4-Phenylene)bis-2-propenoic acid; 2-oxo-2-(1-oxo-3,4-dihydro-2H-naphthalen-2-yl)acetic acid; 3-benzoyl-4-methoxy-2H-furan-5-one; 2,3-Dimethoxy-1,4-naphthoquinone; 4-(Furan-2-yl)-3-methoxybenzoic acid; Acifran; 2-[[3,4-Dihydroxyphenyl]methylidene]-5-methylfuran-3(2H)-one; [5-(4-Methylphenyl)thiophen-2-yl]boronic acid; Quinhydrone; Silane, trimethoxy(3,3,3-trifluoropropyl)-; [1,1'-Biphenyl]-3,3',5,5'-tetrol                                                                                                                                                                                                                                                                                                        | 0.01308 | 0.05154 | -1.53 | 0.42439 | 1.00000 | -1.44 | 0.13433 | 0.49785 | -2.22 | 0.27491 | 0.80882 | -1.17 |
| 802.5605 | 8.8  | PT(18:0/18:1(9Z)); PS(37:1)                                                                                                                                                                                                                                                                                                                                                                                                                                                                                                                                                                                                                                                                                                                                                                                                                                                                                                                                                                                                                                                                          | 0.00002 | 0.00027 | -1.52 | 0.11383 | 0.64653 | -1.27 | 0.00080 | 0.02246 | -3.42 | 0.04034 | 0.26576 | -1.34 |
| 770.5702 | 9.8  | PC(72:4); PC(36:2); PE(39:2); Dioleoylphosphatidylcholine; GPCCho(18:2(2E,4E)/O-18:0)[U]; 1,2-Dioleoyl PC                                                                                                                                                                                                                                                                                                                                                                                                                                                                                                                                                                                                                                                                                                                                                                                                                                                                                                                                                                                            | 0.00581 | 0.02629 | -1.52 | 0.32707 | 1.00000 | -1.49 | 0.09767 | 0.42856 | -1.68 | 0.19621 | 0.64755 | -1.33 |
| 803.5638 | 8.8  | PA(44:6)                                                                                                                                                                                                                                                                                                                                                                                                                                                                                                                                                                                                                                                                                                                                                                                                                                                                                                                                                                                                                                                                                             | 0.00003 | 0.00032 | -1.52 | 0.12738 | 0.66543 | -1.28 | 0.00107 | 0.02528 | -3.67 | 0.04468 | 0.26761 | -1.36 |

\*Fold change between HCC-N and adj.N

| Metabolite                      | Mode | rt (min) | Monoisotopic mass (Da) | Identification*                                                                                                                         |
|---------------------------------|------|----------|------------------------|-----------------------------------------------------------------------------------------------------------------------------------------|
| fumaric acid                    | EI   | 11.2     | 116.01                 | UM=245, RI=1030.4, SS= 942, LP=245, 75, 246, 143                                                                                        |
| malic acid                      | EI   | 13.1     | 134.02                 | UM=233, RI=1180.2, SS=934, LP=233, 133, 75, 245                                                                                         |
| succinic acid                   | EI   | 10.7     | 118.02                 | UM=247, RI=996.5, SS=951, LP=75, 148, 247, 55                                                                                           |
| glucose                         | EI   | 18.1     | 180.06                 | UM=205, RI=1631.0, SS=859, LP=205, 319, 103, 160                                                                                        |
| lactic acid                     | EI   | 6.6      | 90.03                  | UM=117, RI=752.3, SS=953, LP= 117, 191, 148, 190                                                                                        |
| hypoxanthine†                   | EI   | 16.7     | 136.03                 | UM=265, RI=1492.2, SS=935, LP=265, 280, 266, 84                                                                                         |
|                                 | ESI- | 0.6      |                        | m/z= 135.0299, ppm=9, fragment ions = 138.019; 108.0212; 92.0254; 134.8931; 134.8636; 136.8914; 134.9011; 135.0289; 80.9644; 135.8908   |
| xanthosine†                     | EI   | 24.4     | 284.07                 | UM=325, RI=2391.1, SS=895, LP=325, 245, 230, 217                                                                                        |
|                                 | ESI- | 0.6      |                        | m/z= 283.0671, ppm=4, fragment ions = 151.026; 283.0682; 124.0075; 108.02; 150.0428; 214.0496; 171.0051; 117.0222; 133.0135; 89.0233    |
| adenosine monophosphate†        | EI   | 27.1     | 347.06                 | UM= 169, RI=2781.9, SS=934, LP=315, 169, 230, 192                                                                                       |
|                                 | ESI- | 0.6      |                        | m/z= 346.0544, ppm=3, fragment ions = 89.0245; 242.0795; 346.1278; 168.0444; 78.9585; 90.0278; 214.0479; 211.002; 152.997; 345.0321     |
| propionyl carnitine             | ESI+ | 0.6      | 217.13                 | m/z= 218.1391, ppm=2, fragment ions = 218.1395; 221.0196; 85.0288; 159.0658; 219.1429; 144.1036; 86.0324; 160.0711; 202.0661; 220.1457  |
| linoleic acid†                  | ESI- | 8.8      | 280.23                 | m/z=279.2317, ppm=4, fragment ions = 279.2319; 278.9878; 280.986; 280.2384; 282.9937; 282.9735; 216.988; 240.9896; 260.9781; 261.0001   |
| PC(34:2)                        | ESI+ | 8.8      | 757.56                 | m/z=758.57, ppm=0, fragments ions = 758.57; 476.98; 283.27; 265.00; 237.02                                                              |
| PC(38:3)                        | ESI+ | 10.3     | 811.60                 | m/z=812.6162, ppm=0, fragment ions = 184.0746; 812.6171; 813.6202; 814.6226; 185.0771; 627.5352; 184.1160; 628.5384; 812.5215; 184.2872 |
| PC(36:1)                        | ESI+ | 10.4     | 787.60                 | m/z=788.6164, ppm=0, fragment ions = 184.0737; 787.6017; 788.6042; 185.0765; 651.5328; 789.6071; 184.1149; 186.0779; 792.5530; 790.6093 |
| PC(38:2)                        | ESI+ | 10.5     | 813.62                 | m/z=814.632, ppm=0, fragment ions = 184.0745; 813.6199; 814.6221; 185.0782; 628.5385; 629.5414; 816.5525; 813.5264; 814.5308; 815.6257  |
| glycerol 3-phosphate            | ESI- | 0.6      | 172.01                 | m/z=171.0051, ppm=7, fragment ions = 78.9589; 171.0056; 146.9597; 96.9695; 118.966; 152.9915; 139.8937; 172.0104; 172.8294; 104.9954    |
| glycerylphosphoryl ethanolamine | ESI- | 0.6      | 215.05                 | m/z=214.0477, ppm=3, fragment ions = 140.0116; 78.9589; 214.0478; 152.9953; 215.0508; 140.0483; 141.0137; 214.0943; 171.0058; 96.9696   |
| glycerophospho choline          | ESI+ | 0.7      | 257.10                 | m/z=258.11, ppm=0, fragment ions = 104.10799; 125.0008; 184.0741; 86.0972; 140.0691; 258.1107; 98.9850; 261.1321; 166.0630; 105.1106    |
| coenzyme Q10†                   | ESI+ | 12.4     | 862.68                 | m/z=885.6731, ppm=0, fragments ions = 885.6714; 886.6742; 887.6779; 885.7438; 888.6804                                                  |

\*UM = unique mass selected by the deconvolution software, RI = Retention Index, SS = Similarity Score, top 4 Largest Peaks (LP) for GC-MS; precursor ion (m/z), ppm for LC-MS; fragment ions for LC-MS/MS

† Verified by comparison with authentic compounds
